# Supplementary material for: Synthesis of side-chain regioregular and main-chain alternating poly(bichalcogenophene)s and an ABC-type periodic poly(terchalcogenophene)
Source: Royal Society of Chemistry journal article supplement (doi:10.1039/d0sc00404a), 2020-01-01
Supplement: d0sc00404a1.pdf [file d0sc00404a1.pdf]

## Supporting Information

### Synthesis of Side-Chain Regioregular and Main-Chain Alternating Poly(bi chalcogenophenes) and an ABC-Type Periodic Poly(terchalcogenophene)

Huai-Hsuan Liu<sup>a</sup>, Wei-Wei Liang<sup>a</sup>, Yu-Ying Lai<sup>c</sup>, Yen-Chen Su<sup>a</sup>, Hau-Ren Yang<sup>c</sup>, Kuang-Yi Cheng<sup>a</sup>, Sheng-Cih Huang<sup>a</sup> and Yen-Ju Cheng<sup>ab\*</sup>

<sup>a</sup>Department of Applied Chemistry, National Chiao Tung University, 1001 University Road, Hsinchu, 30010, Taiwan

<sup>b</sup>Center for Emergent Functional Matter Science, National Chiao Tung University, 1001 University Road, Hsinchu, 30010, Taiwan

<sup>c</sup>Institute of Polymer Science and Engineering, National Taiwan University, No.1, Sec. 4, Roosevelt Rd., Taipei 10617, Taiwan

[Email: yjcheng@nctu.edu.tw](mailto:yjcheng@nctu.edu.tw)

### Table of Contents

|                                                          |    |
|----------------------------------------------------------|----|
| Experimental procedures .....                            | 2  |
| Synthetic Procedures.....                                | 4  |
| NMR Spectra of Intermediates and Polymers .....          | 14 |
| Procedure for $M_n$ versus Monomer Conversion Plot ..... | 16 |
| MALDI-TOF Mass Spectrometry of PSSeTe .....              | 17 |
| Characteristics of OFETs.....                            | 17 |
| NMR Spectra .....                                        | 19 |
| GPC Traces .....                                         | 47 |
| DFT Computation and Analysis .....                       | 49 |
| References.....                                          | 56 |

## Experimental Procedures

**General measurement and characterization.** UV data were collected by the HITACHI U-4100 spectrophotometer. The electrochemical cyclic voltammetry (CV) was conducted on a CH Instruments Model 611D. A carbon glass coated with a thin polymer film was used as the working electrode and Ag/Ag<sup>+</sup> electrode as the reference electrode, while 0.1 M tetrabutylammonium hexafluorophosphate (Bu<sub>4</sub>NPF<sub>6</sub>) in acetonitrile was the electrolyte. CV curves were calibrated using ferrocene as the standard, whose HOMO is set at -4.8 eV with respect to zero vacuum level. The HOMO energy levels were obtained from the equation  $\text{HOMO} = - (E_{\text{ox}}^{\text{onset}} - E_{(\text{ferrocene})}^{\text{onset}} + 4.8) \text{ eV}$ . The LUMO levels were obtained from the equation  $\text{LUMO} = - (E_{\text{red}}^{\text{onset}} - E_{(\text{ferrocene})}^{\text{onset}} + 4.8) \text{ eV}$ . High resolution mass spectra (HRMS) were obtained on a JEOL AccuTOF GCX (EI). MALDI spectra were recorded on an Bruker Autoflex III system using trans-2-[3-(4-tert-butylphenyl)-2-methyl-2-propenylidene]malononitrile (DCTB) as a matrix in THF (5 mg/mL). GIXRD measurements were performed at the BL23A station of the National Synchrotron Radiation Research Center (NSRRC), Taiwan. Polymer molecular weights were determined with a HLC-8321GPC/HT (1,2,4-trichlorobenzene, 140 °C, 1 mL/min flow rate) using Tosoh Bioscience LLC TSKgel GMHHR-HHT2 mixed-bed columns and narrow molecular weight distribution polystyrene standards.

**Film preparation for GIWAXRD.** The wafers with thermal grown 300 nm SiO<sub>2</sub> were ultrasonically cleaned in sequential detergent, water, acetone, isopropyl alcohol and dried under nitrogen purging, followed by UV/Ozone treatment for 20 min. The polychalcogenophene thin films were prepared from 20 mg/mL solutions in *o*DCB on 1.4 × 1.4 cm silicon wafers. The post-annealing of the thin films was carried out in the glovebox to prevent oxidation.

**OFET fabrication.** A n-type heavily doped Si wafer with a SiO<sub>2</sub> layer of 300 nm and a capacitance of 11.5 nF cm<sup>-2</sup> as the gate electrode and dielectric layer was ultrasonically cleaned sequentially in detergent, water and isopropyl alcohol. Octadecyltrichlorosilane (ODTS) was used as a self-assembled monolayer. The polychalcogenophene samples were

prepared from 20 mg/mL solutions in chloroform and were spin-coated on the ODTS-treated silicon wafers. The gold source and drain electrodes (40 nm in thickness) were then deposited on the organic layer by vacuum evaporation through a shadow mask, affording a bottom-gate, top-contact device configuration. OFET measurement was carried out at room temperature under a nitrogen atmosphere using an Agilent Technologies 4156C instrument. The mobility calculation was based on the equation  $I_{ds} = (W/2L)\mu C_i(V_g - V_t)^2$  in the saturation regime, where  $I_{ds}$  is the drain–source current, W is the channel width (1 mm), L is the channel length (100 mm),  $\mu$  is the field-effect mobility,  $C_i$  is the capacitance per unit area of the dielectric layer,  $V_g$  is the gate voltage, and  $V_t$  is the threshold voltage.

## Synthetic Procedures

All chemicals were purchased from Aldrich, Acros or TCI and used as received unless specified.  $^1\text{H}$  and  $^{13}\text{C}$  NMR spectra were obtained in deuterium-substituted chloroform by Varian 400 MHz spectrometers and 0.5 wt% TMS also used as reference. 3-hexyltellurophene<sup>1</sup>, compound 1<sup>2</sup>, compound 2<sup>3</sup>, compound 3<sup>4</sup> and compound SeS<sup>5</sup> were synthesized as reported.

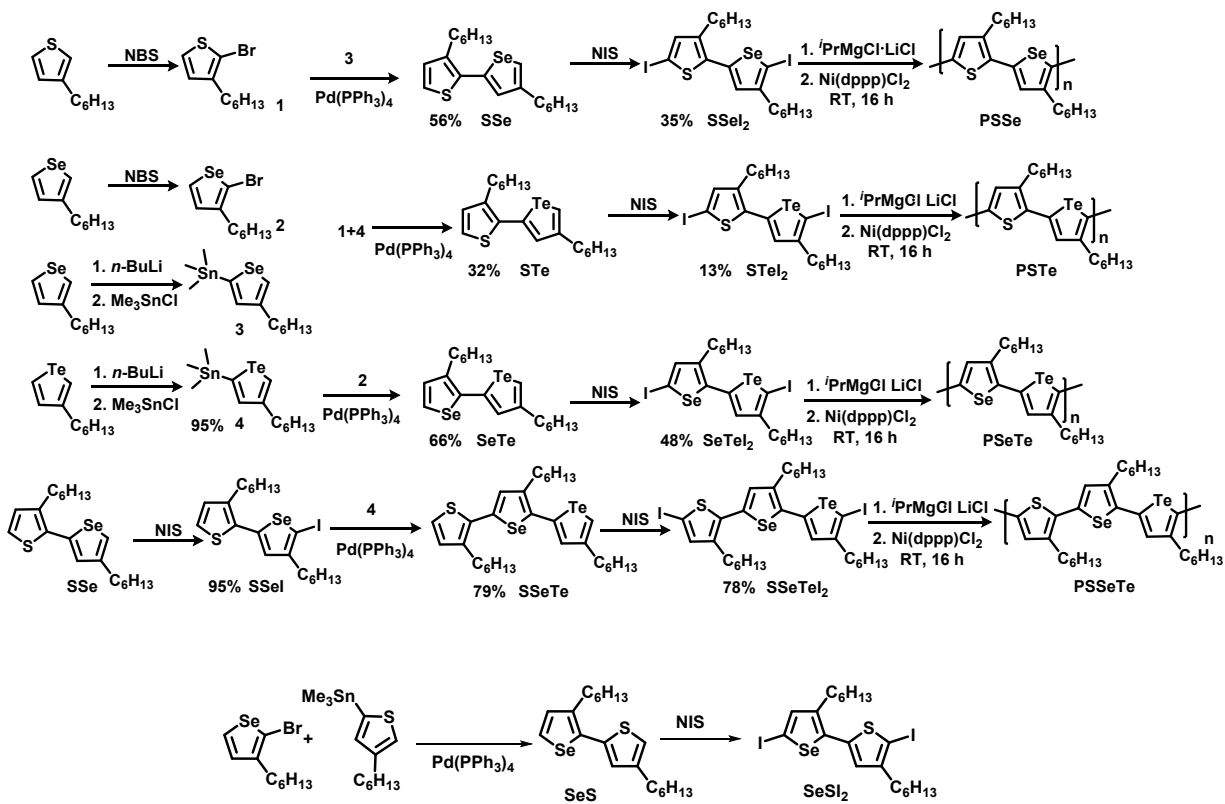

**Scheme S1.** Synthetic routes for  $\text{SSeI}_2$ ,  $\text{SeSI}_2$ ,  $\text{STeI}_2$ ,  $\text{SeTeI}_2$ , and  $\text{SSeTeI}_2$  monomers and their polymers.

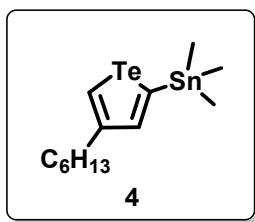

**Synthesis of 2-bromo-3-hexylselenophene (4).** To a solution of 3-hexyltellurophene (2.5

g, 9.40 mmol) in anhydrous THF (40 mL) was added a solution of 2.5 M *n*-BuLi (3.95 mL, 9.87 mmol) dropwisely under 0 °C for 1 h. Then a solution of 1 M trimethyltin chloride (9.4 mL, 9.40 mmol) was added. The reaction mixture was stirred at room temperature for 16 h then extracted with dichloromethane and water. The organic layer was collected and dried with MgSO<sub>4</sub>. After removal of the solvent under reduced pressure, a crude brown oil was obtain (3.84 g, 95 %), the crude compound was used for further reaction without purification.

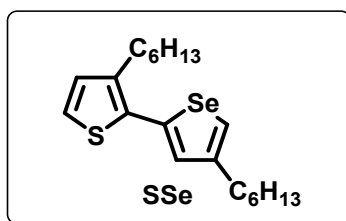

**Synthesis of 3-hexyl-2-(4-hexylselenophen-2-yl)thiophene (SSe).** A mixture of (4-hexylselenophen-2-yl)trimethylstannane **3** (2 g, 5.26 mmol), 2-bromo-3-hexylthiophene **1** (1.29 g, 5.26 mmol), tetrakis(triphenylphosphine)palladium (121 mg, 0.11 mmol) in toluene (50 mL) under N<sub>2</sub> was stirred at 120 °C for 16 h. After removal of the solvent under reduced pressure, the residue was purified by silica gel chromatography with hexane as the eluent to give a yellow oil (1.12 g, 56 %). <sup>1</sup>H NMR (400 MHz, CDCl<sub>3</sub>, δ ppm): 0.87-0.92 (m, 6H), 1.28-1.40 (m, 12H), 1.59-1.67 (m, 4H), 2.58 (t, 2H, *J* = 7.6 Hz), 2.73 (t, 2H, *J* = 8.0 Hz), 6.92 (d, 1H, *J* = 5.2 Hz), 7.13 (d, 1H, *J* = 5.6 Hz), 7.14 (s, 1H), 7.50 (d, 1H, *J* = 1.2 Hz). <sup>13</sup>C NMR (CDCl<sub>3</sub>, 100 MHz, δ ppm): 14.0, 14.1, 22.6, 29.0, 29.1, 29.2, 30.2, 30.7, 31.6, 31.7, 32.2, 123.3, 124.3, 129.9, 130.0, 133.3, 139.0, 140.1, 145.4. HRMS (C<sub>20</sub>H<sub>30</sub>SSe): calcd, 382.1228; found (EI<sup>+</sup>), 382.1228.

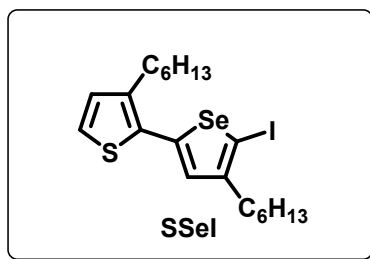

**Synthesis of 3-hexyl-2-(4-hexyl-5-iodoselenophen-2-yl) thiophene (SSeI).** *N*-iodosuccinimide (0.89 g, 3.9 mmol) was added in portions to a solution of SSe (1 g, 2.6 mmol) in DMF (50 mL). The mixture was stirred at room temperature for 3 h. The mixture was quenched in Na<sub>2</sub>S<sub>2</sub>O<sub>3</sub> aqueous solution, followed by the extraction with dichloromethane and water. The organic layer was collected and dried with MgSO<sub>4</sub>. After removal of the solvent under reduced pressure, the residue was purified by silica gel chromatography with hexane as the eluent to give a brown oil (1.27 g, 95%). <sup>1</sup>H NMR (400 MHz, CDCl<sub>3</sub>, δ ppm): 0.87-0.90 (m, 6H), 1.29-1.37 (m, 12H), 1.54-1.59 (m, 4H), 2.50 (t, 2H, *J* = 7.8 Hz), 2.68 (t, 2H, *J* = 8.0 Hz), 6.903 (d, 1H, *J* = 5.2 Hz), 6.905 (s, 1H), 7.15 (d, 1H, *J* = 5.2 Hz). <sup>13</sup>C NMR (CDCl<sub>3</sub>, 100 MHz, δ ppm): 14.0, 14.1, 22.6, 28.9, 29.2, 29.8, 30.7, 31.6, 34.0, 75.5, 123.9, 129.0, 130.0, 132.6, 139.7, 145.0, 149.5. HRMS (C<sub>20</sub>H<sub>29</sub>ISse): calcd, 508.0194; found (EI<sup>+</sup>), 508.0171.

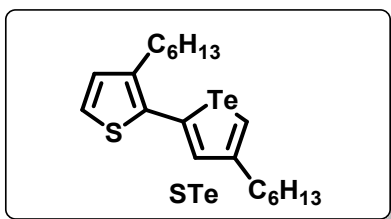

**Synthesis of 3-hexyl-2-(4-hexyltellurophen-2-yl)thiophene (STe).** A mixture of (4-hexyltellurophen-2-yl)trimethylstannane **4** (2.5 g, 5.81 mmol), 2-bromo-3-hexylthiophene **1** (1.43 g, 5.81 mmol), tetrakis(triphenylphosphine)palladium (134 mg, 0.12 mmol) in toluene (55 mL) under N<sub>2</sub> was stirred at 120 °C for 16 h. After removal of the solvent under reduced pressure, the residue was purified by silica gel chromatography with hexane as the eluent to give a yellow oil (0.8 g, 32 %). <sup>1</sup>H NMR (400 MHz, CDCl<sub>3</sub>, δ ppm): 0.90-0.94 (m, 6H), 1.29-1.42 (m, 12H), 1.61-1.67 (m, 4H), 2.61 (t, 2H, *J* = 7.6 Hz), 2.71 (t, 2H, *J* = 8.0 Hz), 6.92 (d, 1H, *J* = 5.2 Hz), 7.09 (d, 1H, *J* = 5.2 Hz), 7.59 (d, 1H, *J* = 1.2 Hz), 8.31 (d, 1H, *J* = 0.8 Hz). <sup>13</sup>C NMR (CDCl<sub>3</sub>, 100 MHz, δ ppm): 14.1, 14.1, 22.6, 29.0, 29.3, 29.4, 30.3, 30.6, 31.6, 31.7, 35.2, 118.9, 122.9, 130.1, 134.9, 137.6, 137.9, 138.1, 152.4. HRMS (C<sub>20</sub>H<sub>30</sub>STe): calcd, 432.1125; found (EI<sup>+</sup>), 432.1122.

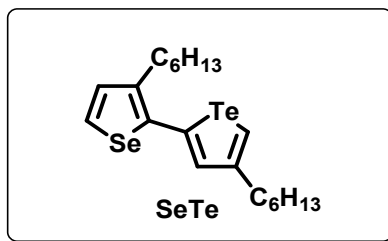

**Synthesis of 3-hexyl-2-(4-hexyltellurophen-2-yl)selenophene (SeTe).** A mixture of (4-hexyltellurophen-2-yl)trimethylstannane **4** (2.5 g, 5.81 mmol), 2-bromo-3-hexylselenophene **2** (1.71g, 5.81 mmol), 2-bromo-3-hexylthiophene (1.43 g, 5.81 mmol), tetrakis(triphenylphosphine)palladium (134 mg, 0.12 mmol) in toluene (55 mL) under N<sub>2</sub> was stirred at 120 °C for 16 h. After removal of the solvent under reduced pressure, the residue was purified by silica gel chromatography with hexane as the eluent to give a yellow oil (1.84 g, 66 %). <sup>1</sup>H NMR (400 MHz, CDCl<sub>3</sub>, δ ppm): 0.86-0.90 (m, 6H), 1.29-1.37 (m, 12H), 1.59-1.63 (m, 4H), 2.58 (m, 2H), 2.67 (t, 2H, *J* = 8.0 Hz), 7.19 (d, 1H, *J* = 6.0 Hz), 7.51 (d, 1H, *J* = 1.6 Hz), 7.74 (d, 1H, *J* = 5.6 Hz), 8.31 (t, 1H, *J* = 0.8 Hz). <sup>13</sup>C NMR (CDCl<sub>3</sub>, 100 MHz, δ ppm): 14.0, 14.1, 22.6, 29.0, 29.3, 30.2, 30.4, 30.6, 31.6, 31.7, 35.2, 119.2, 127.8, 133.6, 137.0, 138.6, 139.8, 142.4, 152.2. HRMS (C<sub>20</sub>H<sub>30</sub>SeTe): calcd, 480.0569; found (EI<sup>+</sup>), 480.0559.

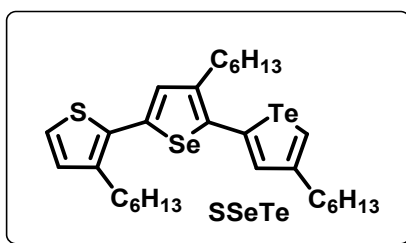

**Synthesis of 3-hexyl-2-(4-hexyl-5-(4-hexyltellurophen-2-yl)selenophen-2-yl)thiophene (SSeTe).** A mixture of (4-hexyltellurophen-2-yl)trimethylstannane (92.4 g, 0.217 mmol), SSeI (100 mg, 0.197 mmol), and tetrakis(triphenylphosphine)palladium(0) (11.4 mg, 0.01 mmol) in toluene (1.9 mL) under N<sub>2</sub> was stirred at 120 °C for 16 h. After removal of the solvent under reduced pressure, the residue was purified by silica gel chromatography with hexane as the eluent to give a yellow oil (127 mg, 79%). <sup>1</sup>H NMR (400 MHz, CDCl<sub>3</sub>, δ ppm): 0.86-0.90 (m, 9H), 1.29-1.40 (m, 18H), 1.60-1.66 (m, 6H), 2.58 (t, 2H, *J* = 7.6 Hz), 2.66 (t, 2H, *J* = 7.8 Hz), 2.75 (t, 2H, *J* = 7.8 Hz), 6.91 (d, 1H, *J* = 5.2 Hz), 7.130 (s, 1H),

7.131 (d, 1H,  $J = 5.2$  Hz), 7.52 (s, 1H), 8.32 (s, 1H),  $^{13}\text{C}$  NMR ( $\text{CDCl}_3$ , 100 MHz,  $\delta$  ppm): 14.1, 22.6, 29.0, 29.3, 29.4, 29.7, 30.3, 30.5, 30.6, 30.7, 31.7, 35.2, 119.4, 123.4, 130.2, 131.8, 133.0, 136.3, 137.7, 138.3, 139.3, 140.1, 142.5, 152.3. HRMS ( $\text{C}_{30}\text{H}_{44}\text{SSeTe}$ ): calcd, 646.1386; found ( $\text{EI}^+$ ), 646.1411.

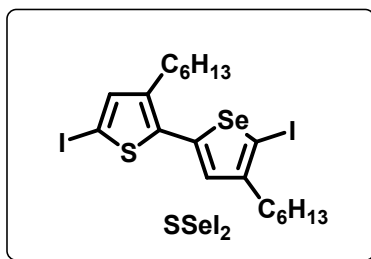

**Synthesis of 3-hexyl-2-(4-hexyl-5-iodoselenophen-2-yl)-5-iodothiophene ( $\text{SSeI}_2$ ).** To a solution of  $\text{SSe}$  (1 g, 2.62 mmol) and *p*-toluenesulfonic acid (1g, 5.24 mmol) in  $\text{CH}_2\text{Cl}_2$  (30 mL) was added *N*-iodosuccinimide (1.3 g, 5.76 mmol) in portions. The reaction was stirred at room temperature for 3 h. The mixture was then quenched in  $\text{Na}_2\text{S}_2\text{O}_3$  aqueous solution, and followed by the extraction with dichloromethane and water. The organic layer was collected and dried with  $\text{MgSO}_4$ . After removal of the solvent under reduced pressure, the residue was purified by silica gel chromatography with hexane as the eluent to give a brown oil (0.58 g, 35 %).  $^1\text{H}$  NMR (400 MHz,  $\text{CDCl}_3$ ,  $\delta$  ppm): 0.87-0.90 (m, 6H), 1.29-1.37 (m, 12H), 1.54-1.59 (m, 4H), 2.50 (t, 2H,  $J = 7.8$  Hz), 2.63 (t, 2H,  $J = 7.8$  Hz), 6.85 (s, 1H), 7.04 (s, 1H).  $^{13}\text{C}$  NMR ( $\text{CDCl}_3$ , 100 MHz,  $\delta$  ppm): 14.0, 14.1, 22.6, 28.9, 29.1, 29.8, 30.6, 31.5, 31.6, 33.9, 72.0, 76.4, 129.5, 138.6, 139.7, 141.5, 143.3, 149.6. HRMS ( $\text{C}_{20}\text{H}_{28}\text{I}_2\text{SSe}$ ): calcd, 633.9161; found ( $\text{EI}^+$ ), 633.9187.

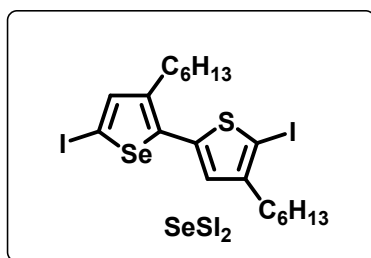

**Synthesis of 3-hexyl-2-(4-hexyl-5-iodothiophen-2-yl)-5-iodoselenophene ( $\text{SeSI}_2$ ).** To a solution of  $\text{SeS}$  (300 mg, 0.787 mmol) and *p*-toluenesulfonic acid (299 mg, 1.57 mmol) in



CH<sub>2</sub>Cl<sub>2</sub> (15 mL), *N*-iodosuccinimide (265 mg, 1.18 mmol) was added in portions, the reaction was stirred at room temperature for 3 h. The mixture was then quenched in Na<sub>2</sub>S<sub>2</sub>O<sub>3</sub> aqueous solution, and followed by the extraction with dichloromethane and water. The organic layer was collected and dried with MgSO<sub>4</sub>. After removal of the solvent under reduced pressure, the residue was purified by silica gel chromatography with hexane as the eluent to give a brown oil (230 mg, 46 %). <sup>1</sup>H NMR (400 MHz, CDCl<sub>3</sub>, δ ppm): 0.87-0.90 (m, 6H), 1.29-1.37 (m, 12H), 1.54-1.59 (m, 4H), 2.51 (t, 2H, *J* = 7.8 Hz), 2.62 (t, 2H, *J* = 7.8 Hz), 6.63 (s, 1H), 7.37 (s, 1H). <sup>13</sup>C NMR (CDCl<sub>3</sub>, 100 MHz, δ ppm): 14.1, 22.5, 22.6, 28.9, 29.1, 29.7, 29.8, 29.9, 30.7, 31.5, 31.6, 32.3, 73.8, 74.8, 127.3, 140.5, 141.5, 143.4, 143.5, 147.6. HRMS (C<sub>20</sub>H<sub>28</sub>I<sub>2</sub>S<sub>2</sub>Se): calcd, 633.9161; found (EI<sup>+</sup>), 633.9159.

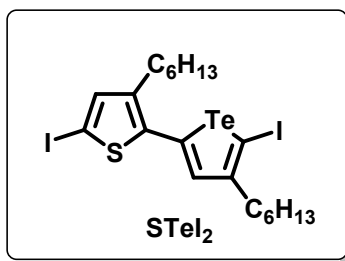

**Synthesis of 3-hexyl-2-(4-hexyl-5-iodotellurophen-2-yl)-5-iodothiophene (STeI<sub>2</sub>).** To a solution of **STe** (1 g, 2.31 mmol) and *p*-toluenesulfonic acid (0.88g, 4.62 mmol) in CH<sub>2</sub>Cl<sub>2</sub> (25 mL) was added *N*-iodosuccinimide (1.3 g, 5.08 mmol) in portions. The reaction was stirred at room temperature for 3 h. The mixture was then quenched in Na<sub>2</sub>S<sub>2</sub>O<sub>3</sub> aqueous solution, and followed by the extraction with dichloromethane and water. The organic layer was collected and dried with MgSO<sub>4</sub>. After removal of the solvent under reduced pressure, the residue was purified by silica gel chromatography with hexane as the eluent to give a brown oil (0.21 g, 13%). <sup>1</sup>H NMR (400 MHz, CDCl<sub>3</sub>, δ ppm): 0.87-0.90 (m, 6H), 1.26-1.36 (m, 12H), 1.55-1.59 (m, 4H), 2.51-2.59 (m, 2H), 7.03 (s, 1H), 7.20 (s, 1H). <sup>13</sup>C NMR (CDCl<sub>3</sub>, 100 MHz, δ ppm): 14.0, 14.1, 22.5, 22.6, 28.9, 29.0, 29.2, 29.8, 30.6, 31.5, 31.6, 36.5, 67.8, 71.6, 136.5, 138.0, 139.8, 140.6, 143.0, 155.4. HRMS (C<sub>20</sub>H<sub>28</sub>I<sub>2</sub>STe): calcd, 683.9058; found (EI<sup>+</sup>), 683.9062.

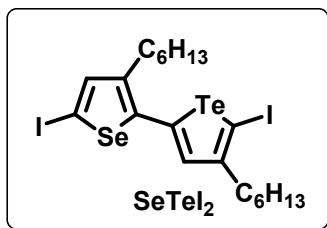

**Synthesis of 3-hexyl-2-(4-hexyl-5-iodotellurophen-2-yl)-5-iodoselenophene (SeTeI<sub>2</sub>).** *N*-iodosuccinimide (1.3 g, 4.58 mmol) was added to a solution of **SeTe** (1 g, 2.08 mmol) and *p*-toluenesulfonic acid (0.79g, 4.16 mmol) in CH<sub>2</sub>Cl<sub>2</sub> (25 mL) in portions. The reaction was stirred at room temperature for 3 h. The mixture was then quenched in Na<sub>2</sub>S<sub>2</sub>O<sub>3</sub> aqueous solution, and followed by the extraction with dichloromethane and water. The organic layer was collected and dried with MgSO<sub>4</sub>. After removal of the solvent under reduced pressure, the residue was purified by silica gel chromatography with hexane as the eluent to give a brown oil (0.73 g, 48 %). <sup>1</sup>H NMR (400 MHz, CDCl<sub>3</sub>, δ ppm): 0.87-0.91 (m, 6H), 1.30-1.35 (m, 12H), 1.53-1.57 (m, 4H), 2.52 (t, 2H, *J* = 8.0 Hz), 2.55 (t, 2H, *J* = 8.0 Hz), 7.13 (s, 1H), 7.36 (s, 1H). <sup>13</sup>C NMR (CDCl<sub>3</sub>, 100 MHz, δ ppm): 14.0, 14.1, 22.5, 22.6, 28.9, 29.2, 29.8, 30.0, 30.1, 31.5, 31.6, 36.5, 68.1, 73.3, 137.1, 140.2, 142.2, 143.8, 147.8, 155.3. HRMS (C<sub>20</sub>H<sub>28</sub>I<sub>2</sub>TeSe): calcd, 731.8502; found (EI<sup>+</sup>), 731.8507.

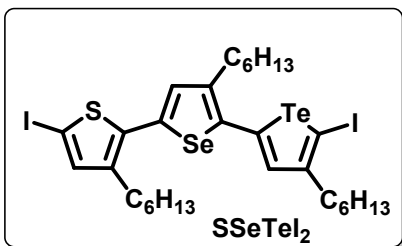

**Synthesis of 3-hexyl-2-(4-hexyl-5-(4-hexyl-5-iodohexyltellurophen-2-yl)selenophen-2-yl)-5-iodothiophene (SSeTeI<sub>2</sub>).** To a solution of **SSeTe** (0.5 g, 0.78 mmol), *p*-toluenesulfonic acid (0.29 g, 1.56 mmol) in CH<sub>2</sub>Cl<sub>2</sub> (25 mL) was added *N*-iodosuccinimide (0.44 g, 1.94 mmol) in portions. The mixture was stirred at room temperature for 3 h. The mixture was then quenched in Na<sub>2</sub>S<sub>2</sub>O<sub>3</sub> aqueous solution, followed by the extraction with dichloromethane and water. The organic layer was collected and dried with MgSO<sub>4</sub>. After removal of the solvent under reduced pressure, the residue was purified by silica gel chromatography with hexane as the eluent to give a yellow solid (0.54 g, 78%). <sup>1</sup>H NMR

(400 MHz, CDCl<sub>3</sub>,  $\delta$  ppm): 0.87-0.91 (m, 9H), 1.30-1.36 (m, 18H), 1.55-1.60 (m, 6H), 2.53 (t, 2H,  $J = 8.0$  Hz), 2.57 (t, 2H,  $J = 8.0$  Hz), 2.68 (t, 2H,  $J = 8.0$  Hz), 7.04 (s, 1H), 7.05 (s, 1H), 7.21 (s, 1H). <sup>13</sup>C NMR (CDCl<sub>3</sub>, 100 MHz,  $\delta$  ppm): 14.1, 22.61, 22.64, 29.0, 29.1, 29.2, 29.3, 29.7, 29.9, 30.59, 30.63, 31.63, 31.66, 31.68, 36.5, 67.3, 71.7, 132.1, 136.5, 136.6, 138.8, 139.9, 140.76, 140.79, 141.2, 142.5, 155.3. HRMS (C<sub>30</sub>H<sub>42</sub>I<sub>2</sub>STeSe): calcd, 897.9319; found (EI<sup>+</sup>), 897.9306.

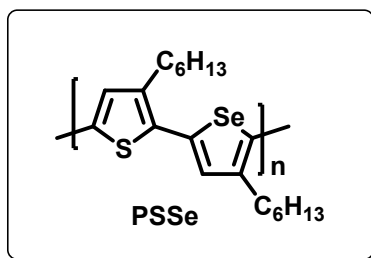

**Synthesis of poly(3-hexylselenophene-*alt*-3-hexylthiophene) (PSSe).** To a solution of 1.3 M isopropylmagnesium chloride lithium chloride complex (0.25 mL, 0.32 mmol) diluted by dried THF (8 mL) was added dropwisely a solution of SSeI<sub>2</sub> (200 mg, 0.32 mmol) in dried THF (8 mL) in a glovebox. After Grignard metathesis was completed (monitored by thin layer chromatography), [1,3-bis(diphenylphosphino)propane]dichloronickel(II) (1.7 mg, 0.0032 mmol) was added. The reaction was stirred at room temperature for 16 h. After PSSe was precipitated with 6 M HCl/MeOH solution and washed with methanol, a deep purple solid was yielded (43 mg, 36 %). <sup>1</sup>H NMR (400 MHz, CDCl<sub>3</sub>,  $\delta$  ppm): 0.91 (br, 6H), 1.25-1.43 (br, 12H), 1.68-1.70 (br, 4H), 2.76 (br, 4H), 6.92 (s, 1H), 7.19 (s, 1H). <sup>13</sup>C NMR (CDCl<sub>3</sub>, 100 MHz,  $\delta$  ppm): 13.90, 13.92, 22.5, 29.1, 29.2, 29.5, 30.39, 30.44, 30.5, 30.6, 31.6, 129.1, 131.6, 133.2, 135.2, 135.8, 138.0, 139.7, 141.6.

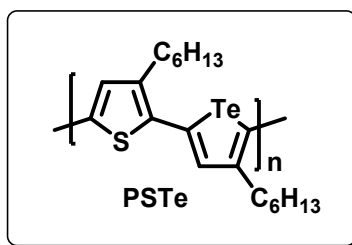

**Synthesis of poly(3-hexyltellurophene-*alt*-3-hexylthiophene) (PSTe).** To a solution of 1.3 M isopropylmagnesium chloride lithium chloride complex (0.22 mL, 0.29 mmol) diluted by dried THF (8 mL) was added dropwisely a solution of **STeI<sub>2</sub>** (200 mg, 0.29 mmol) in dried THF (8 mL) in a glovebox. After Grignard metathesis was completed (monitored by thin layer chromatography), [1,3-bis(diphenylphosphino)propane]dichloronickel(II) (1.6 mg, 0.0029 mmol) was added. The reaction was stirred at room temperature for 16 h. After **PSTe** was precipitated with 6 M HCl/MeOH solution and washed with methanol, a deep purple solid was yielded (56 mg, 44 %). <sup>1</sup>H NMR (400 MHz, CDCl<sub>3</sub>, δ ppm): 0.90-0.93 (br, 6H), 1.34-1.42 (br, 12H), 1.66-1.68 (br, 4H), 2.65-2.67 (br, 2H), 2.69-2.78 (br, 2H), 6.82 (s, 1H), 7.65 (s, 1H). <sup>13</sup>C NMR (CDCl<sub>3</sub>, 100 MHz, δ ppm): 14.0, 14.1, 22.7, 29.3, 29.4, 29.8, 30.6, 30.8, 31.75, 31.77, 32.5, 129.5, 131.4, 133.0, 137.7, 139.2, 139.7, 139.8, 148.2.

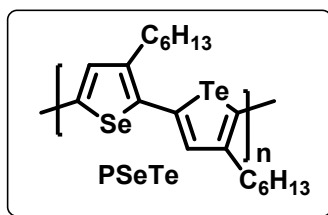

**Synthesis of poly(3-hexyltellurophene-*alt*-3-hexylselenophene) (PSeTe).** To a solution of 1.3 M isopropylmagnesium chloride lithium chloride complex (0.21 mL, 0.27 mmol) diluted by dried THF (8 mL) was added dropwisely a solution of **SeTeI<sub>2</sub>** (200 mg, 0.27 mmol) in dried THF (8 mL) in a glovebox. After Grignard metathesis was completed (monitored by thin layer chromatography), [1,3-bis(diphenylphosphino)propane]dichloronickel(II) (1.4 mg, 0.0027 mmol) was added. The reaction was stirred at room temperature for 16 h. After **PSeTe** was precipitated with 6 M HCl/MeOH solution and washed with methanol, a deep purple solid was yielded (70 mg, 53 %). <sup>1</sup>H NMR (400 MHz, CDCl<sub>3</sub>, δ ppm): 0.92-0.95 (br, 6H), 1.27-1.44 (br, 12H), 1.67 (br, 4H), 2.63 (br, 2H), 2.74 (br, 2H), 6.97 (s, 1H), 7.54 (s, 1H). <sup>13</sup>C NMR (CDCl<sub>3</sub>, 100 MHz, δ ppm): 14.05, 14.06, 22.7, 29.0, 29.3, 29.4, 30.3, 30.61, 30.63, 30.7, 30.87, 30.91, 31.76, 31.77, 32.5, 35.3, 132.9, 134.6, 134.8, 140.5, 140.8, 143.0, 143.9, 147.7.

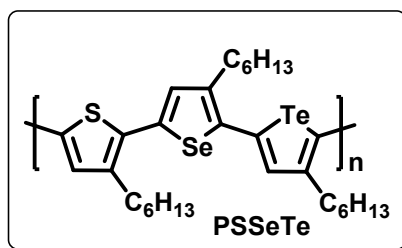

**Synthesis of ABC-type periodic terpolymer, poly(3-hexyltellurophene-*per*-3-hexylselenophene-*per*-3-hexylthiophene) (PSSeTe).** To a solution of 1.3 M isopropylmagnesium chloride lithium chloride complex (0.17 mL, 0.22 mmol) diluted by dried THF (8 mL) was added dropwisely a solution of **SSeTeI<sub>2</sub>** (200 mg, 0.22 mmol) in dried THF (8 mL) in a glovebox. After Grignard metathesis was completed (monitored by thin layer chromatography), [1,3-bis(diphenylphosphino)propane]dichloronickel(II) (1.2 mg, 0.0022 mmol) was added. The reaction was stirred at room temperature for 16 h. After **PSSeTe** was precipitated with 6 M HCl/MeOH solution and washed with methanol, a deep purple solid was yielded (110 mg, 77 %). <sup>1</sup>H NMR (400 MHz, CDCl<sub>3</sub>, δ ppm): 0.92-0.95 (br, 9H), 1.27-1.44 (br, 18H), 1.67 (br, 6H), 2.69 (br, 2H), 2.77 (br, 4H), 6.83 (s, 1H), 7.17 (s, 1H), 7.58 (s, 1H). <sup>13</sup>C NMR (CDCl<sub>3</sub>, 100 MHz, δ ppm): 14.05, 14.06, 22.68, 22.69, 29.0, 29.31, 29.34, 29.4, 29.7, 30.3, 30.6, 30.7, 30.8, 31.76, 31.77, 31.78, 32.5, 35.3, 129.5, 131.8, 131.9, 133.3, 135.0, 137.6, 140.0, 140.1, 140.5, 140.8, 142.5, 148.1.

## NMR Spectra of Intermediates and Polymers

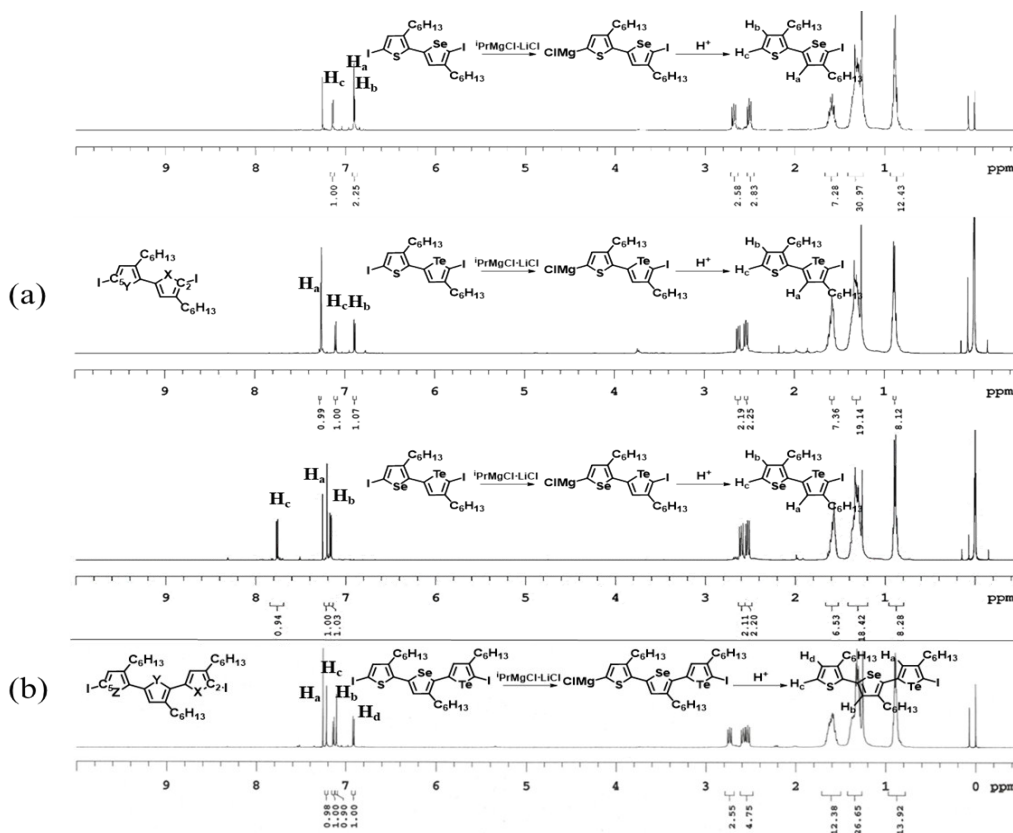

**Figure S1.**  $^1\text{H}$  NMR spectra of the crude products from Grignard metathesis/acidic quenching of (a)  $\text{SSeI}_2$ ,  $\text{STeI}_2$ , and  $\text{SeTeI}_2$  and (b)  $\text{SSeTeI}_2$ .

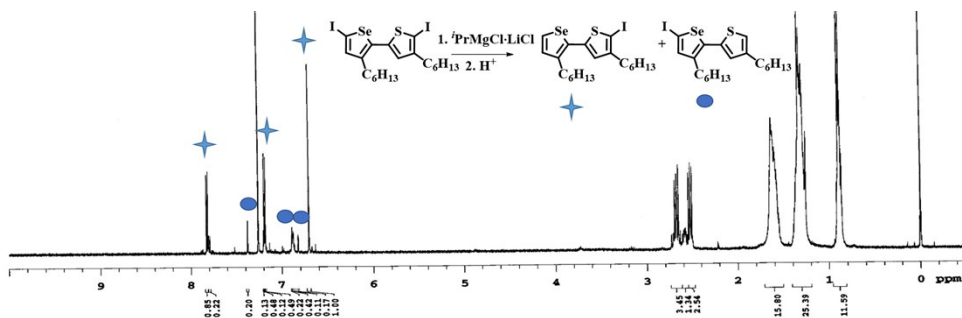

**Figure S2.** Crude  $^1\text{H}$ -NMR spectrum for Grignard metathesis of  $\text{SSeI}_2$  followed by acid quenching.

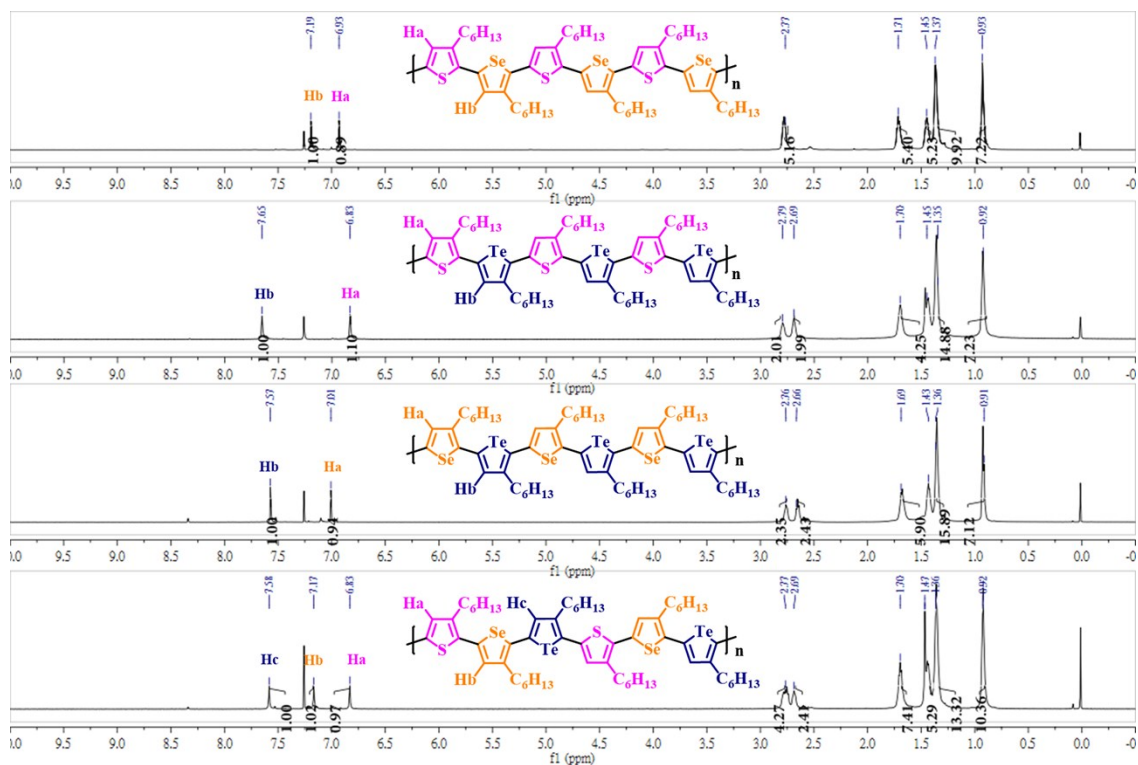

Figure S3.  $^1\text{H}$  NMR spectra of PSSe, PSTe, PSeTe, and PSSeTe.

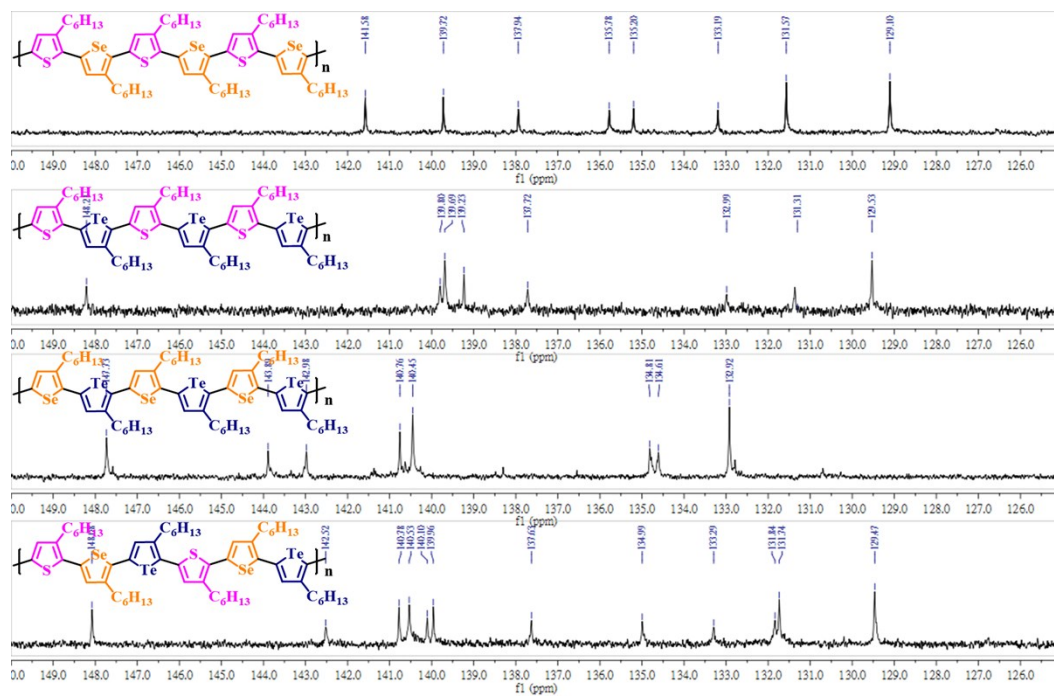

Figure S4.  $^{13}\text{C}$  NMR spectra (aromatic region) of PSSe, PSTe, PSeTe, and PSSeTe.

### Procedure for $M_n$ versus Monomer Conversion Plot

To a solution of isopropylmagnesium chloride lithium chloride complex (1.3 M, 0.169 mL, 0.22 mmol) diluted by dried THF (6 mL) was added dropwisely a solution of **STeI<sub>2</sub>** (150 mg, 0.22 mmol) with nonadecane (59 mg, 0.22 mmol) in dried THF (6 mL) as the internal standard. An aliquot was subjected to GC-MS analysis to determine the initial ratio of monomer to the internal standard (nonadecane). [1,3-bis(diphenylphosphino)propane]dichloronickel(II) (1.2 mg, 0.0022 mmol) was quickly added to the solution in one portion. Aliquots (1 mL) were taken periodically over a period of 5 min to determine the monomer conversion (GC-MS) and number average molecular weight (GPC).

**Table S1.**  $M_n$  and PDI versus monomer conversion of **PSTe**.

| Monomer conversion (%) | $M_n$ | PDI  |
|------------------------|-------|------|
| 8.3                    | 552   | 1.20 |
| 70.8                   | 10267 | 1.35 |
| 95.9                   | 14931 | 1.19 |
| 97.3                   | 15663 | 1.20 |
| 98.3                   | 16162 | 1.19 |

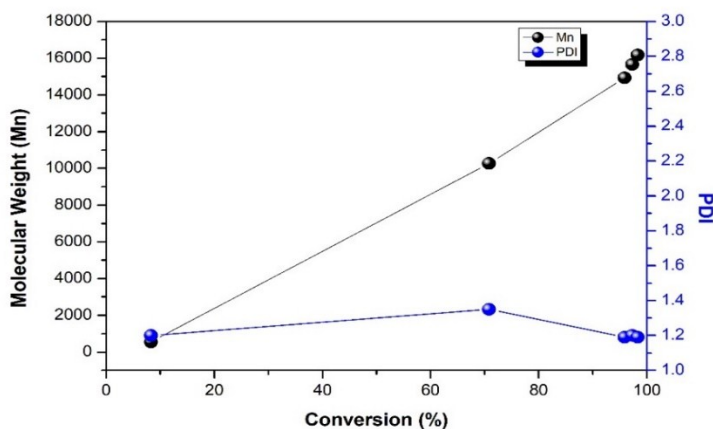

**Figure S5.** Dependence of  $M_n$  and PDI on monomer conversion for **PSTe**.



## MALDI-TOF Mass Spectrometry of PSSeTe

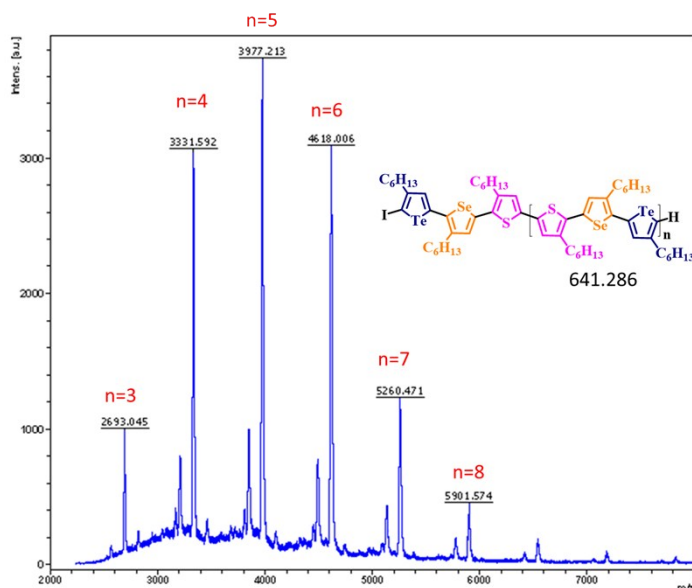

Figure S6. MALDI-TOF-MS of PSSeTe.

## Characteristics of OFETs

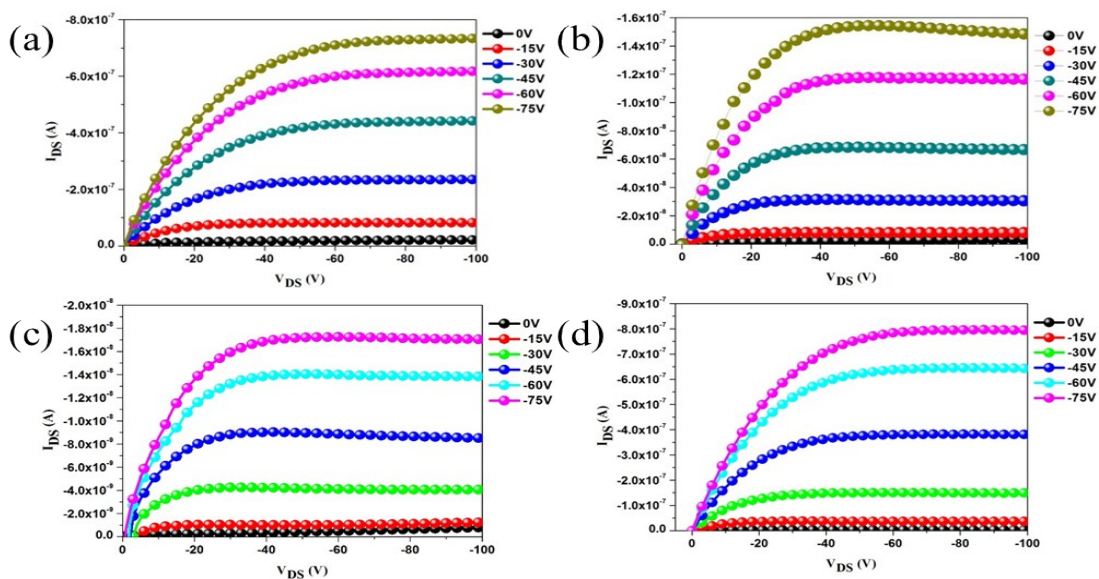

Figure S7. Output characteristics of OFETs based on (a) PSSe, (b) PSTe, (c) PSeTe, and (d) PSSeTe.

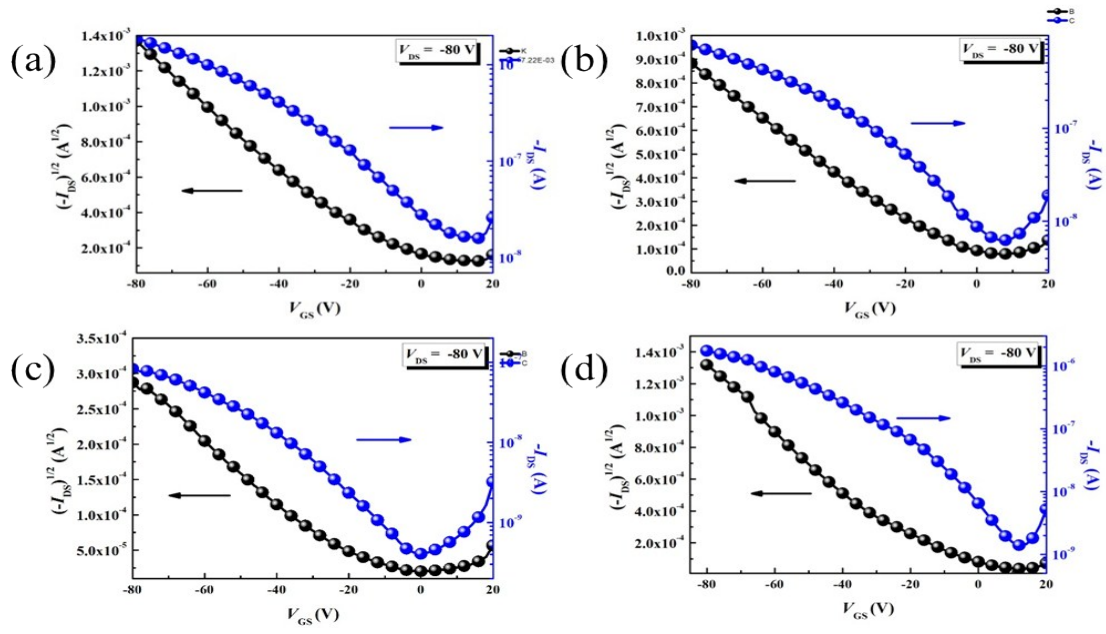

**Figure S8.** Transfer characteristics of OFETs based on (a) PSSe, (b) PSTe, (c) PSeTe, and (d) PSSeTe.

# NMR Spectra

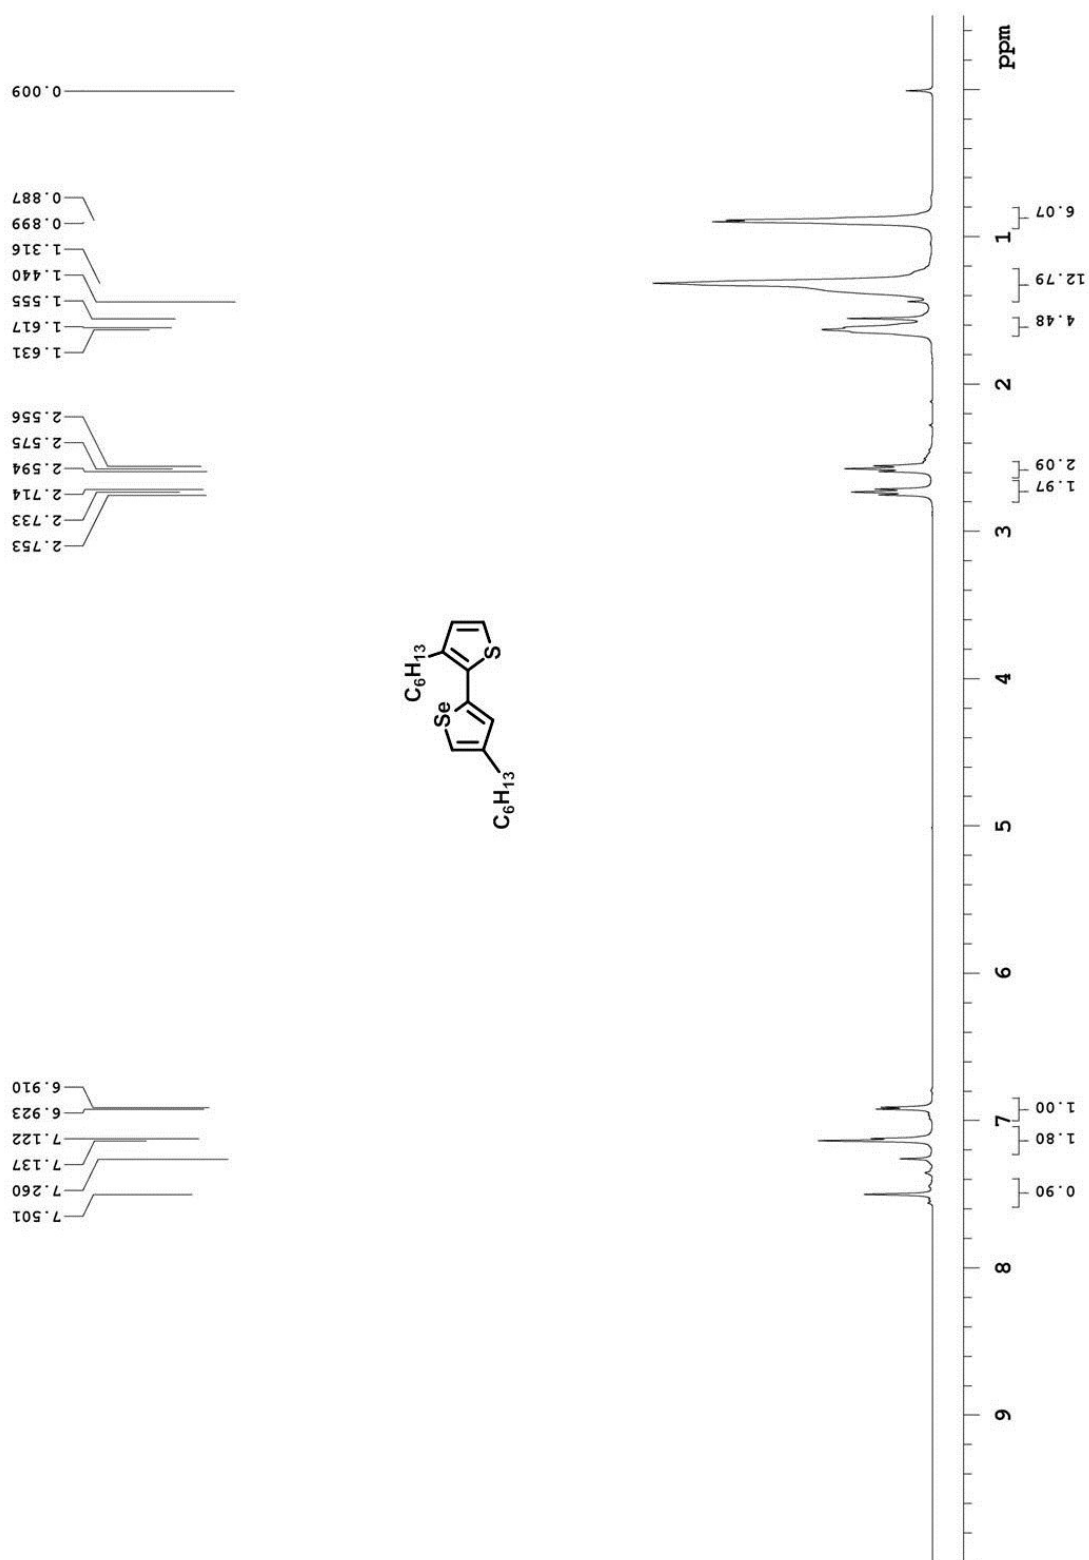

Figure S9.  $^1\text{H}$  NMR spectrum of SSe.

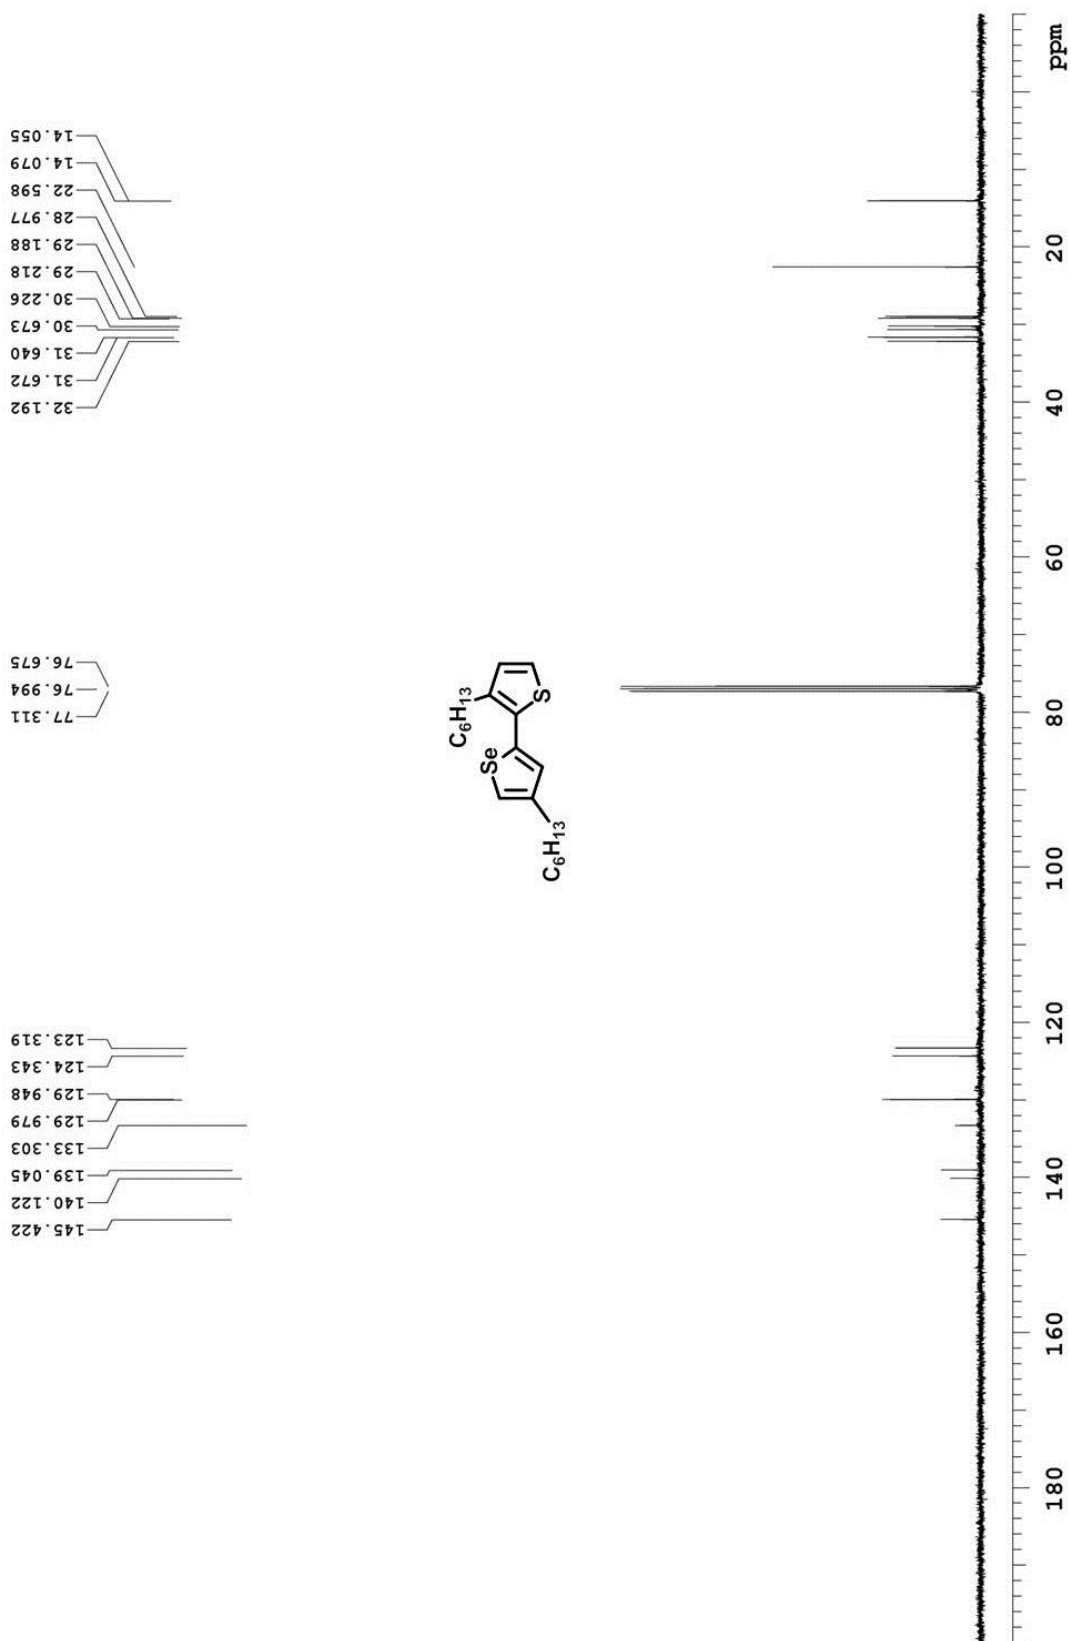

Figure S10.  $^{13}\text{C}$  NMR spectrum of SSe.

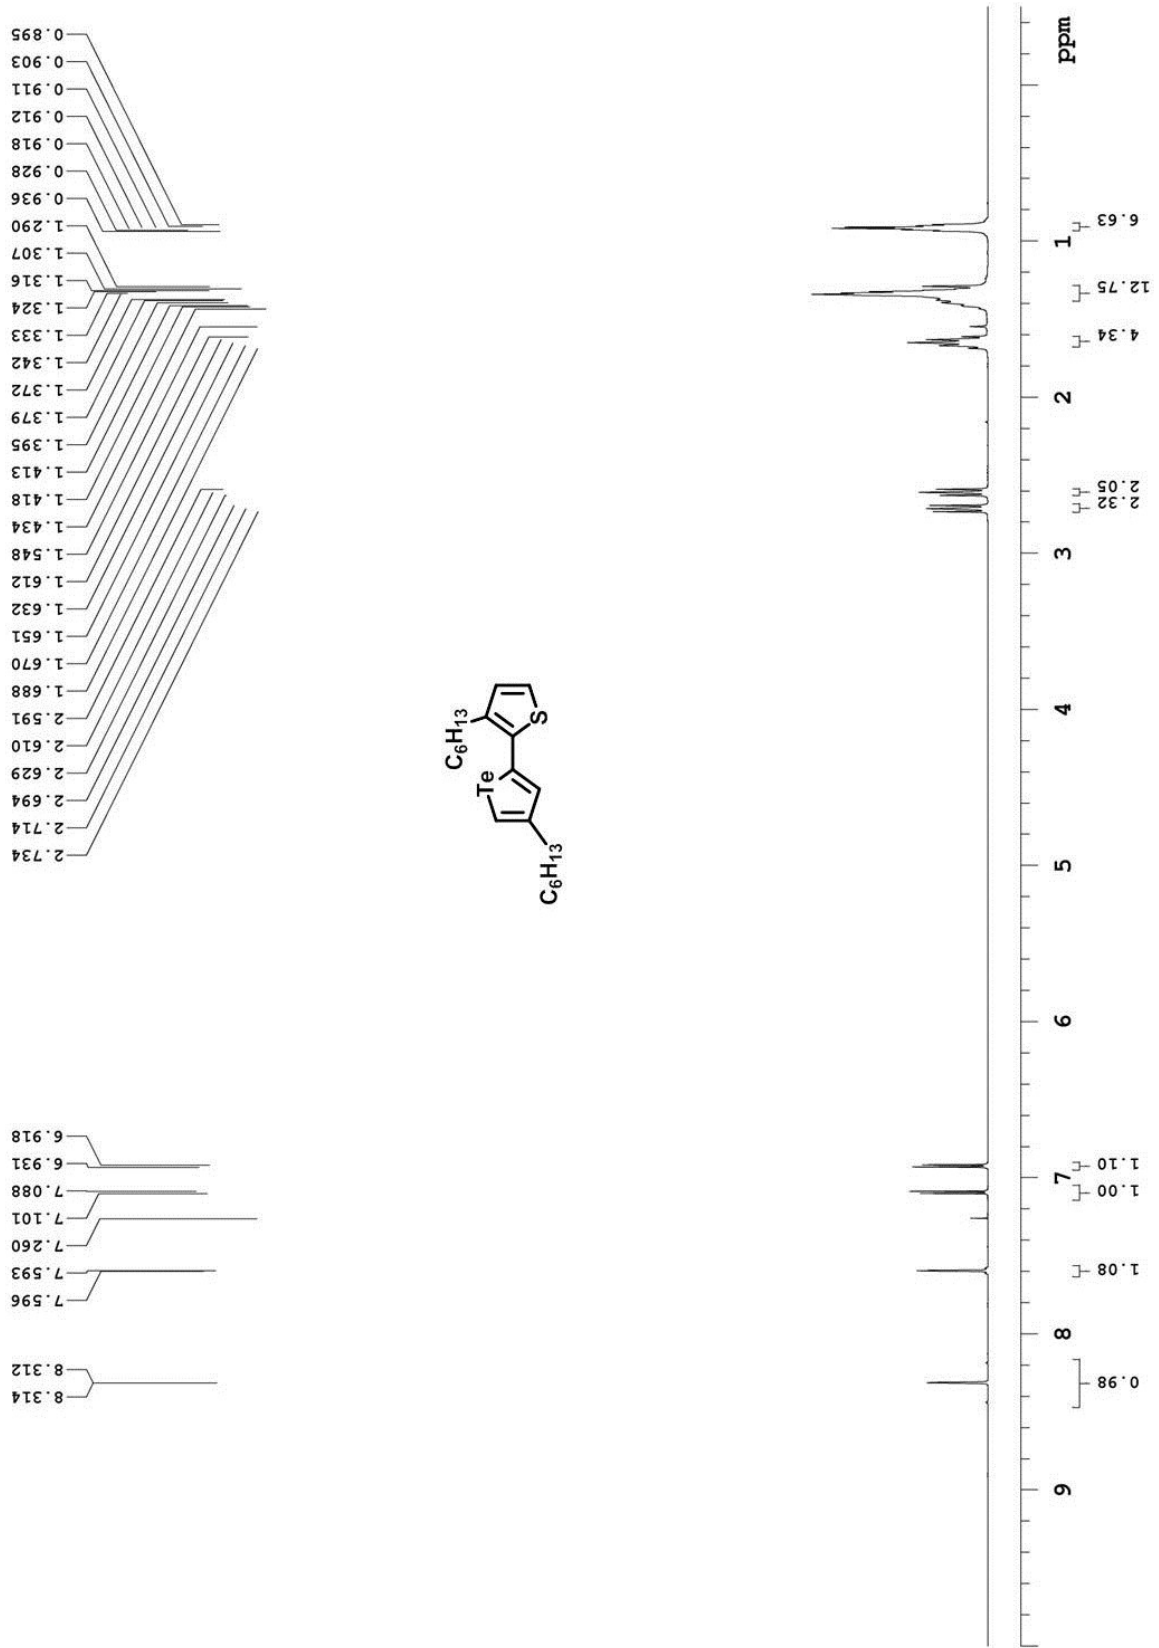

Figure S11. <sup>1</sup>H NMR spectrum of STe.  
S21

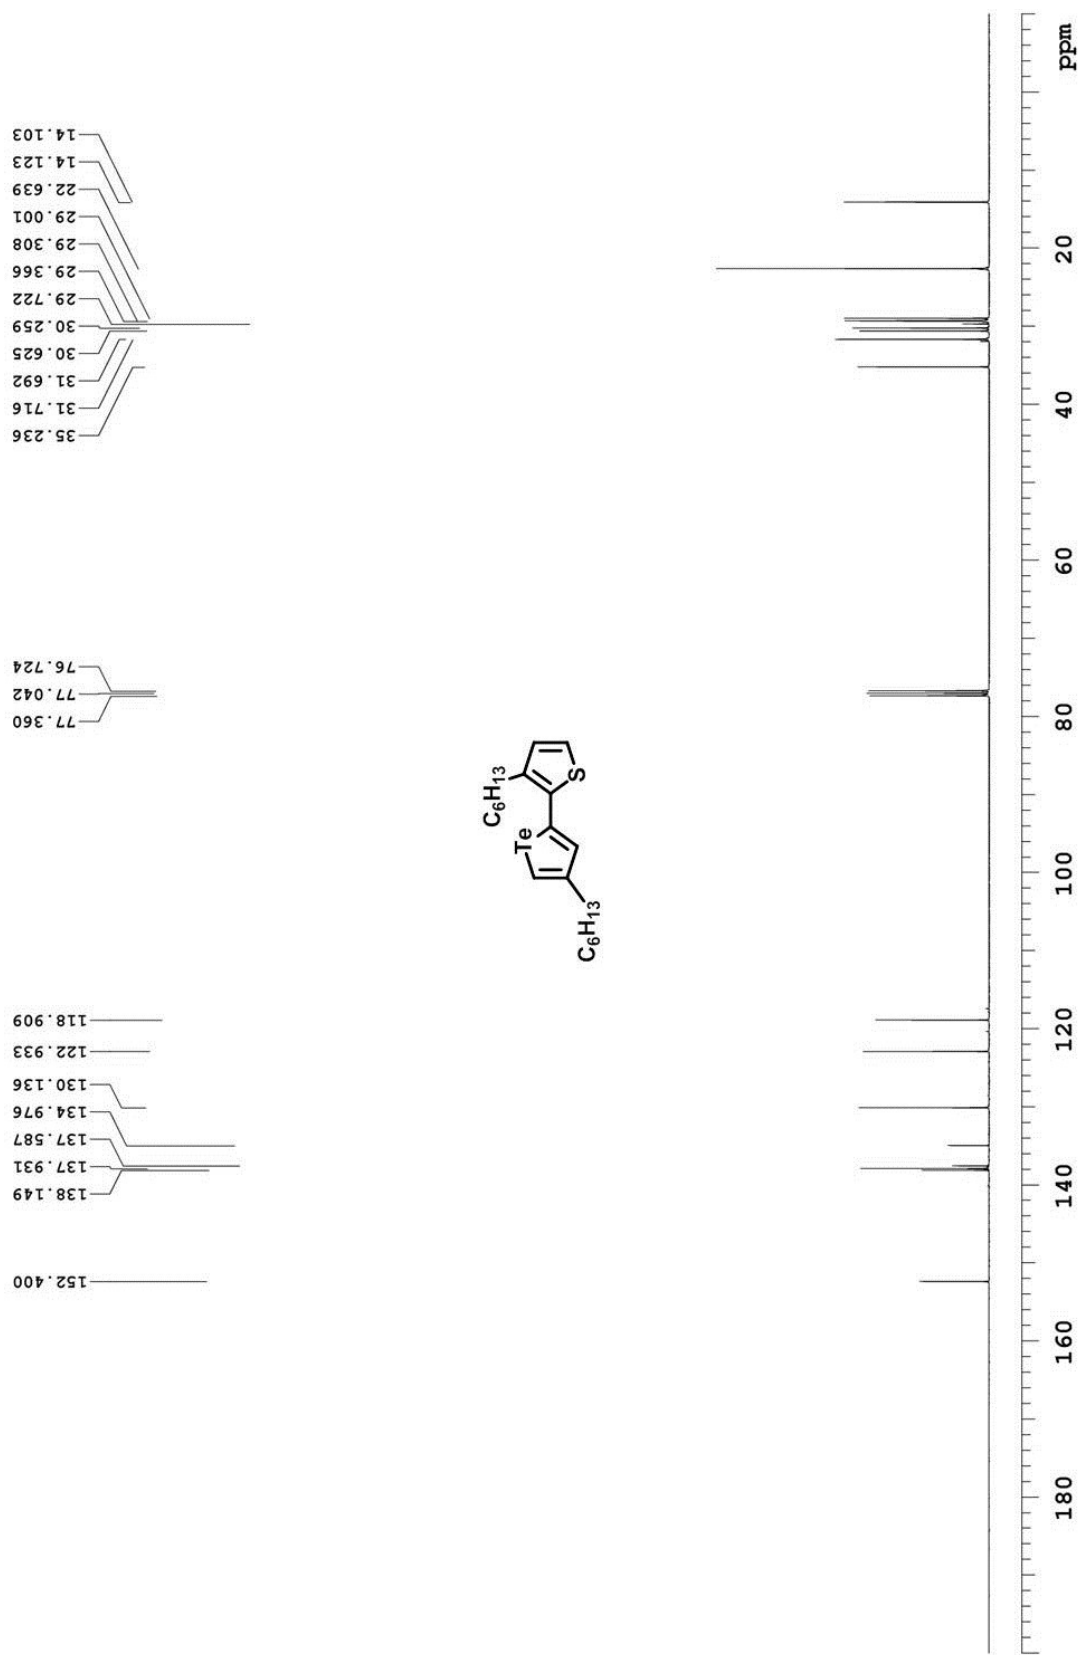

**Figure S12.**  $^{13}\text{C}$  NMR spectrum of STe.

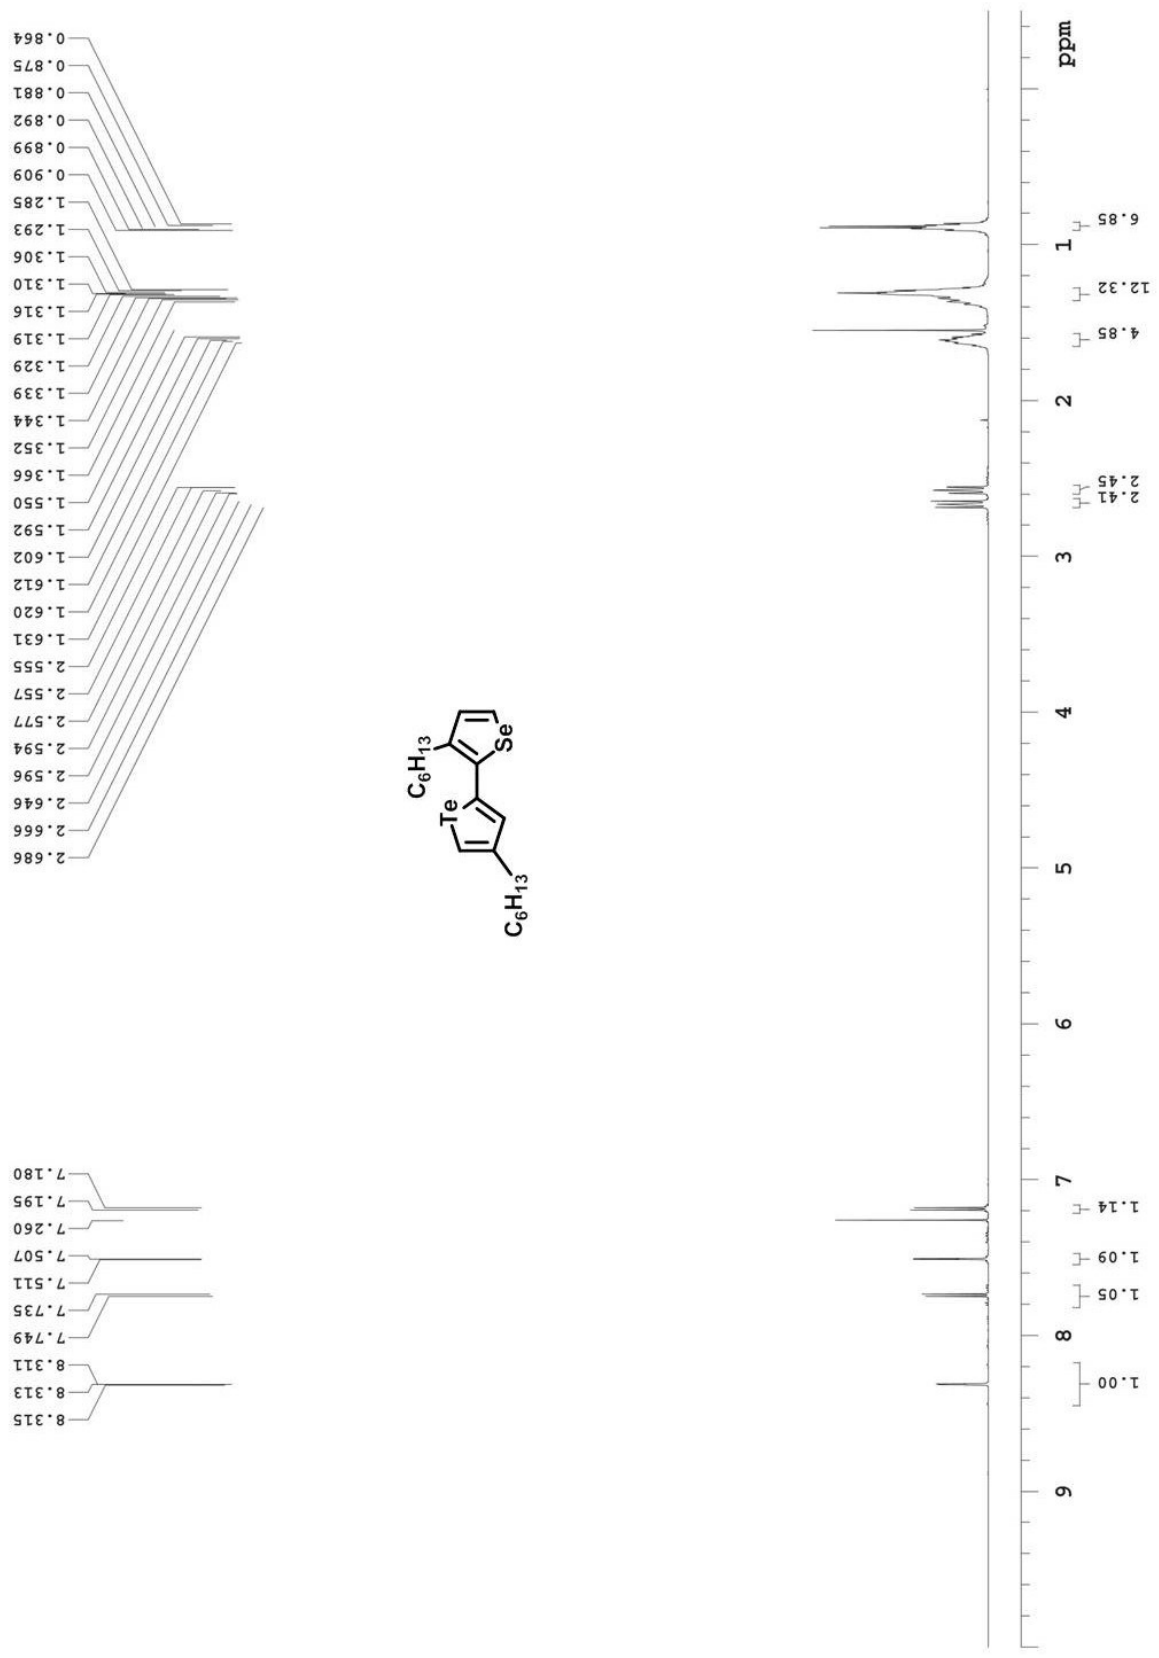

**Figure S13.**  $^1\text{H}$  NMR spectrum of SeTe.

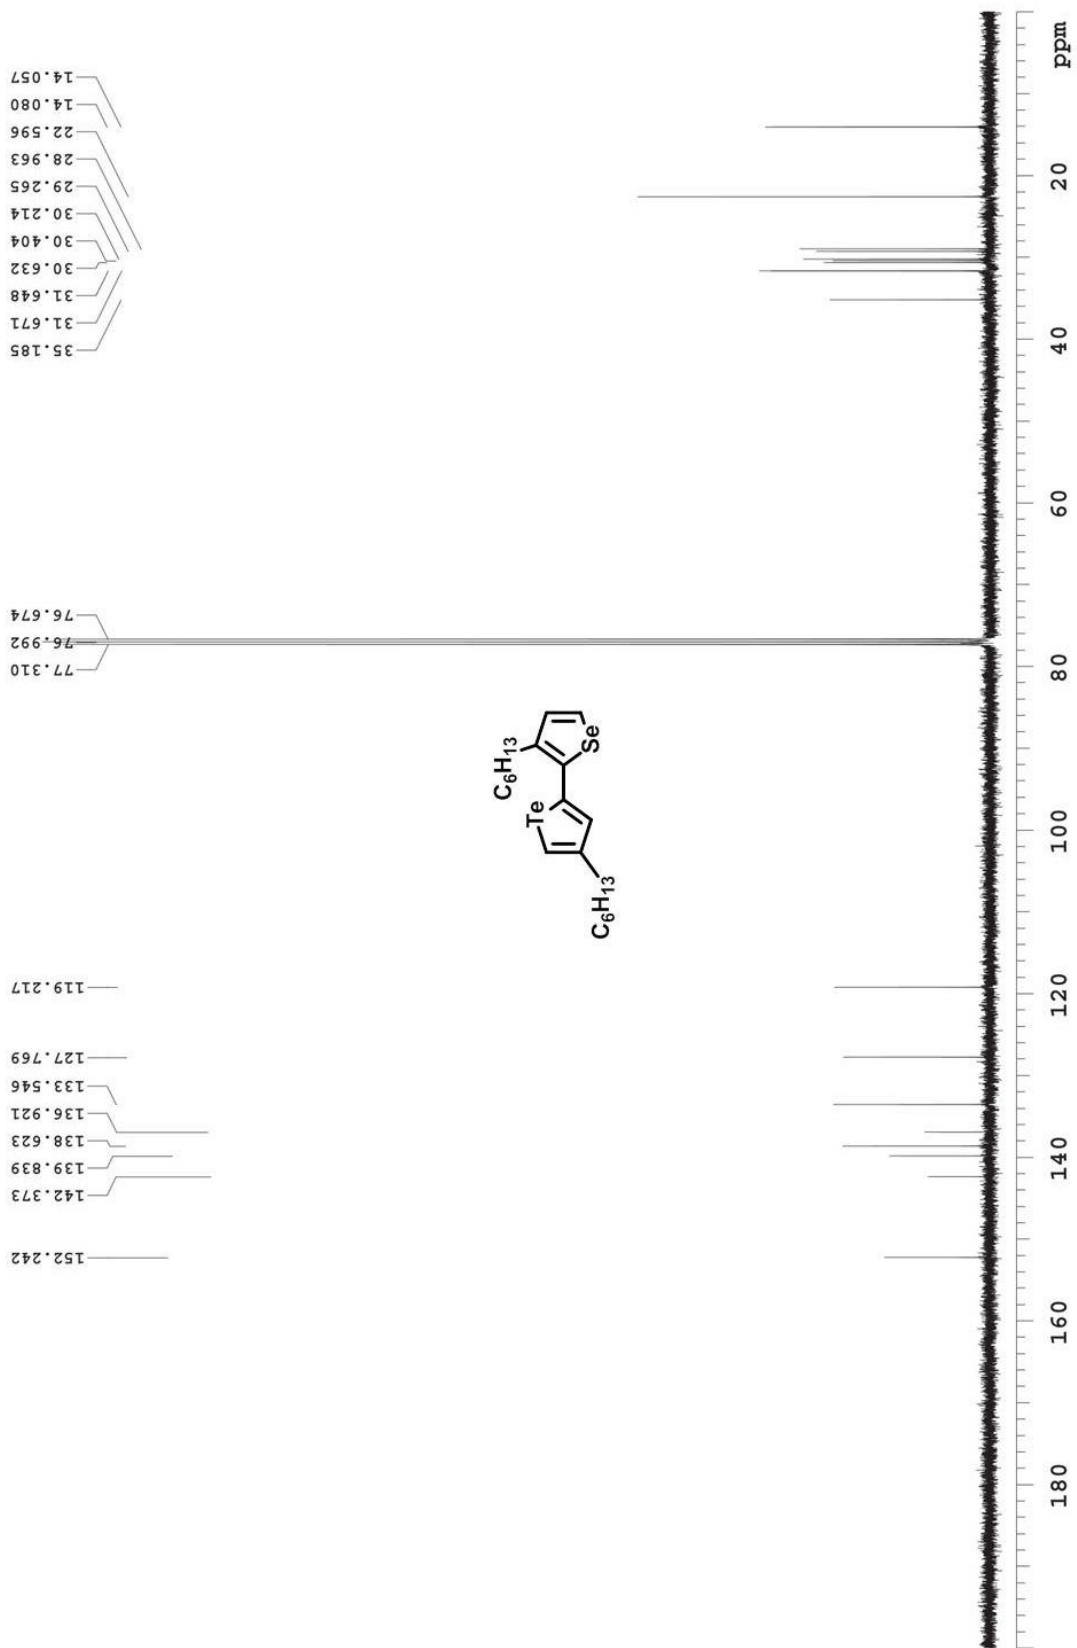

**Figure S14.**  $^{13}\text{C}$  NMR spectrum of SeTe.



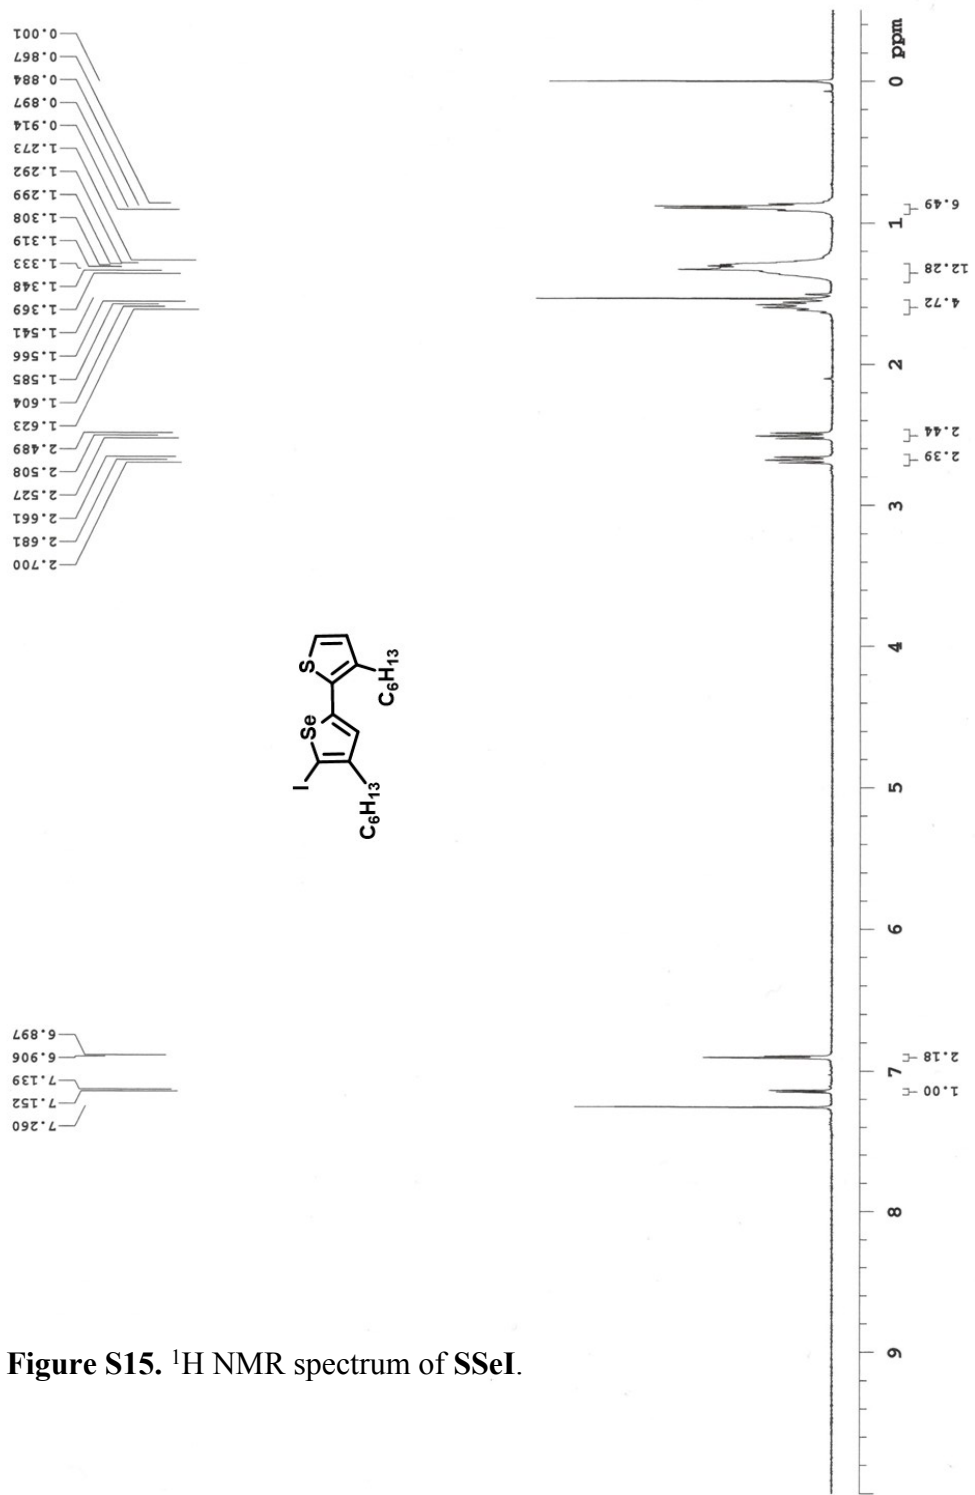

**Figure S15.**  $^1\text{H}$  NMR spectrum of SSeI.

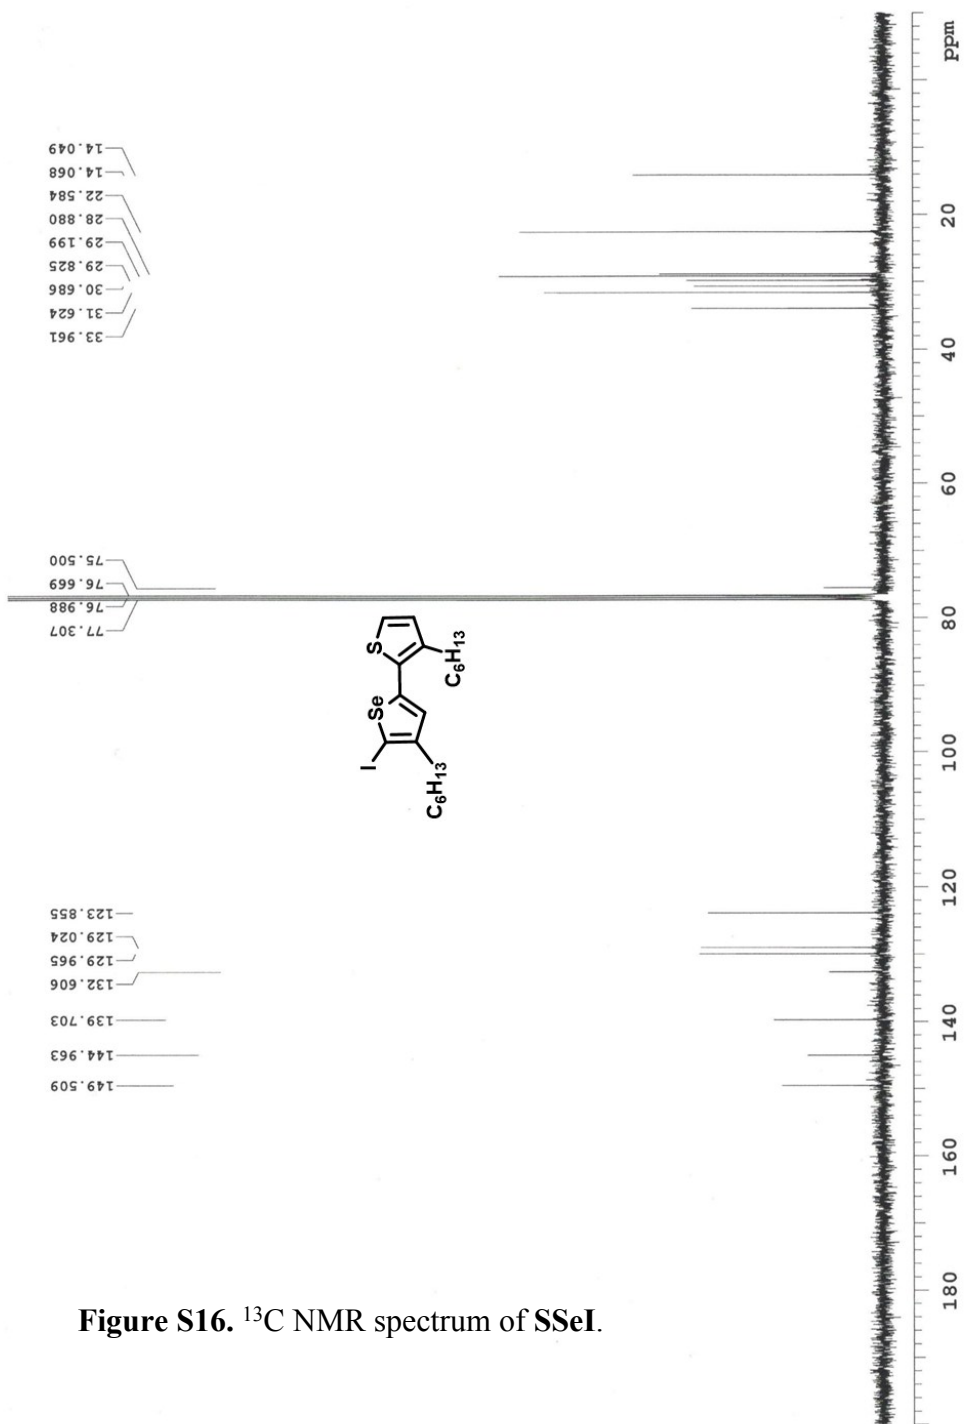

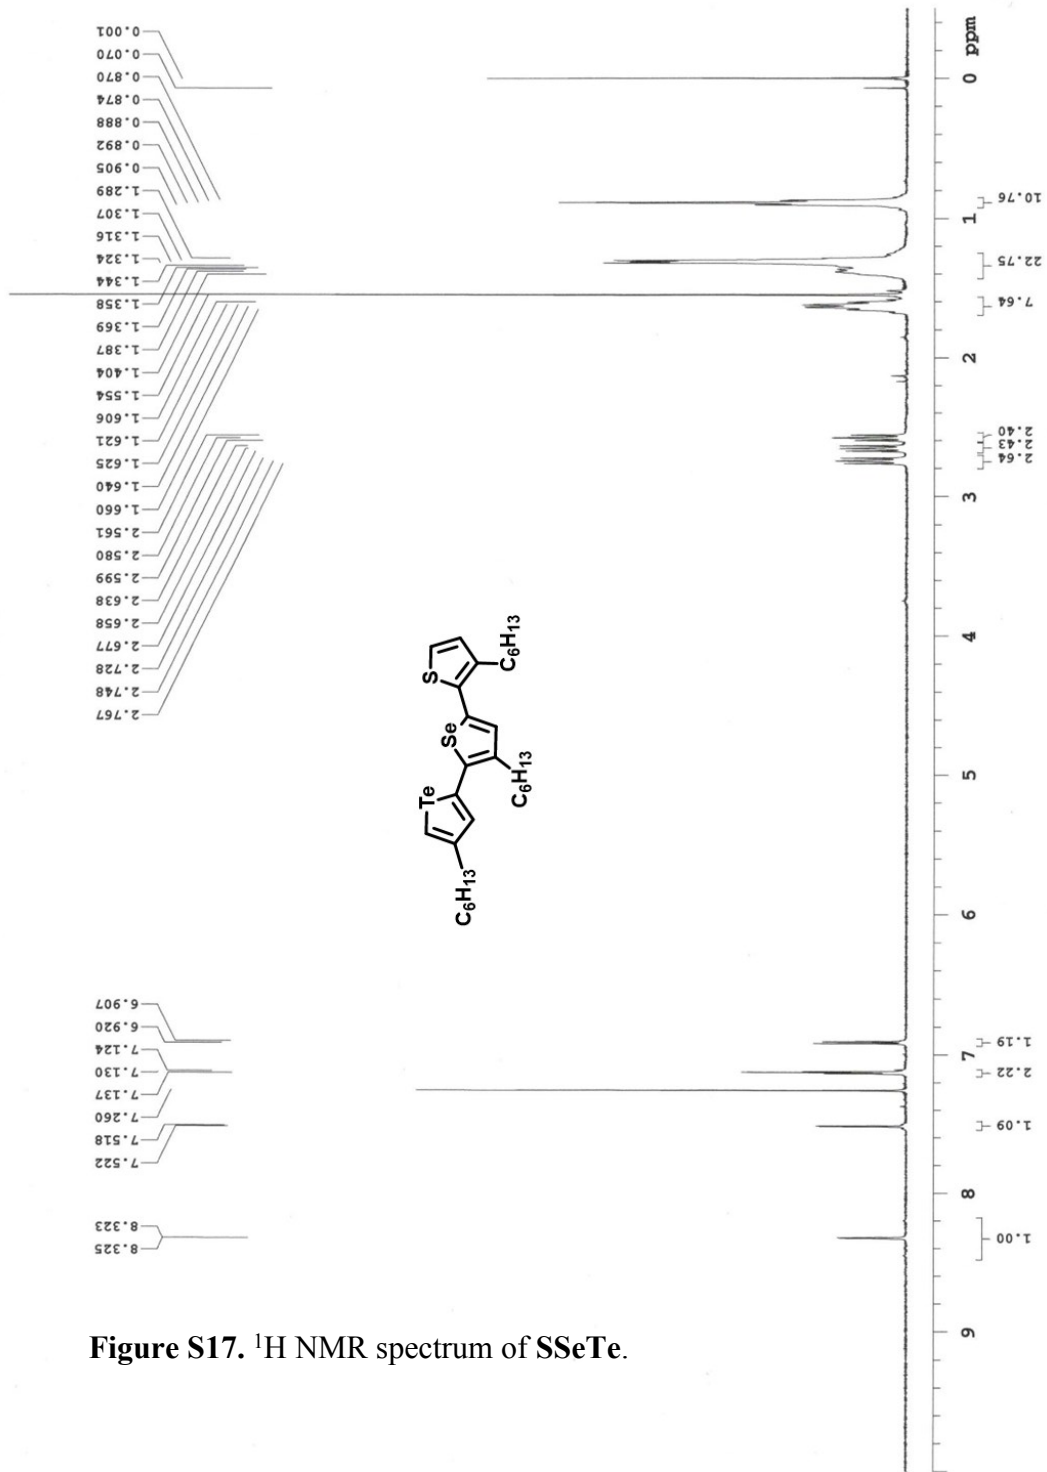

**Figure S17.** <sup>1</sup>H NMR spectrum of SSeTe.

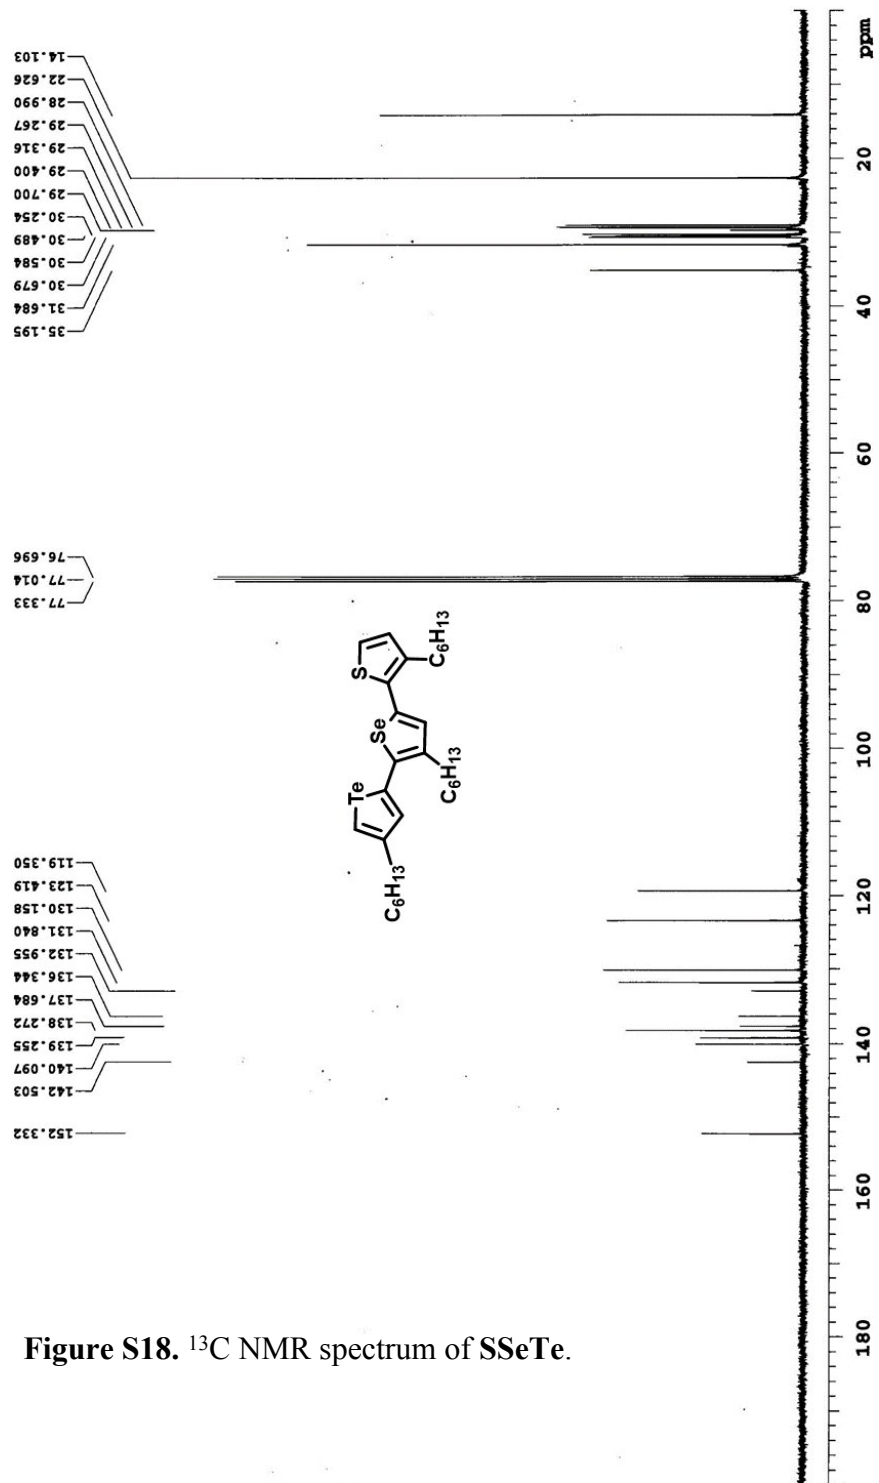

Figure S18.  $^{13}\text{C}$  NMR spectrum of SSeTe.

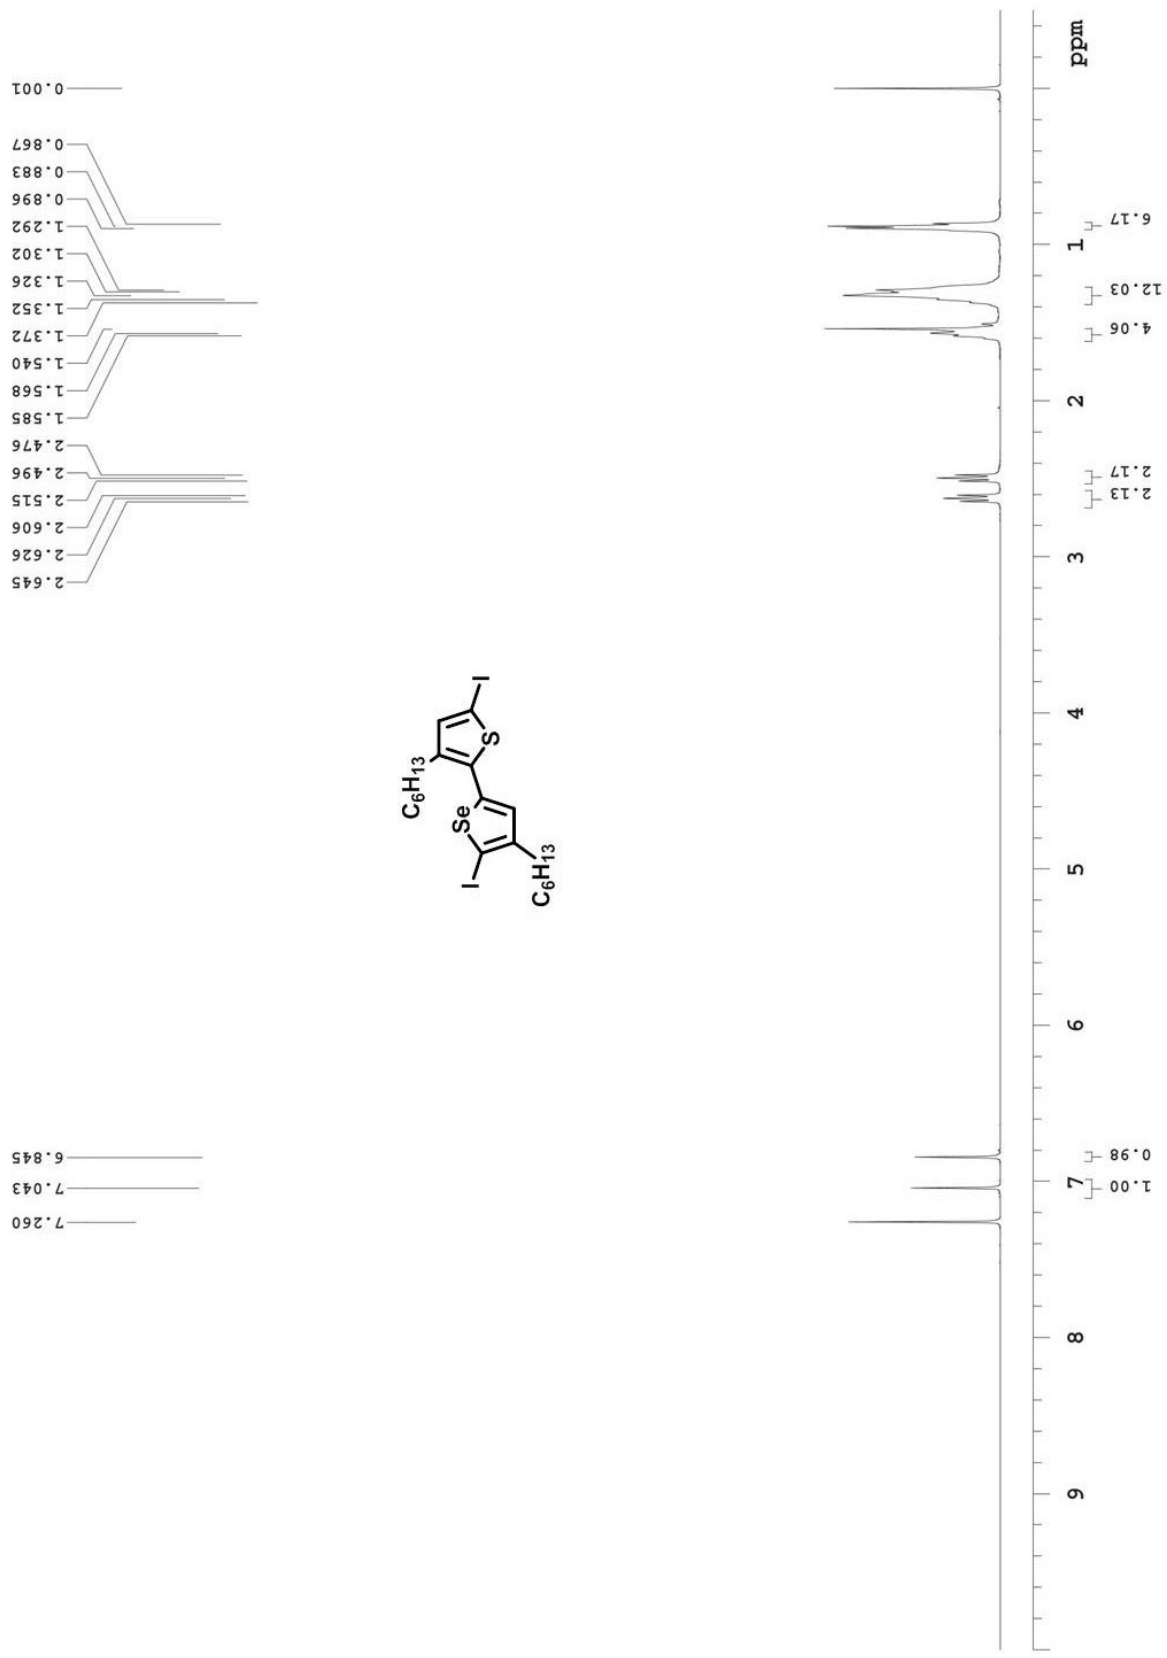

Figure S19. <sup>1</sup>H NMR spectrum of SSeI<sub>2</sub>.

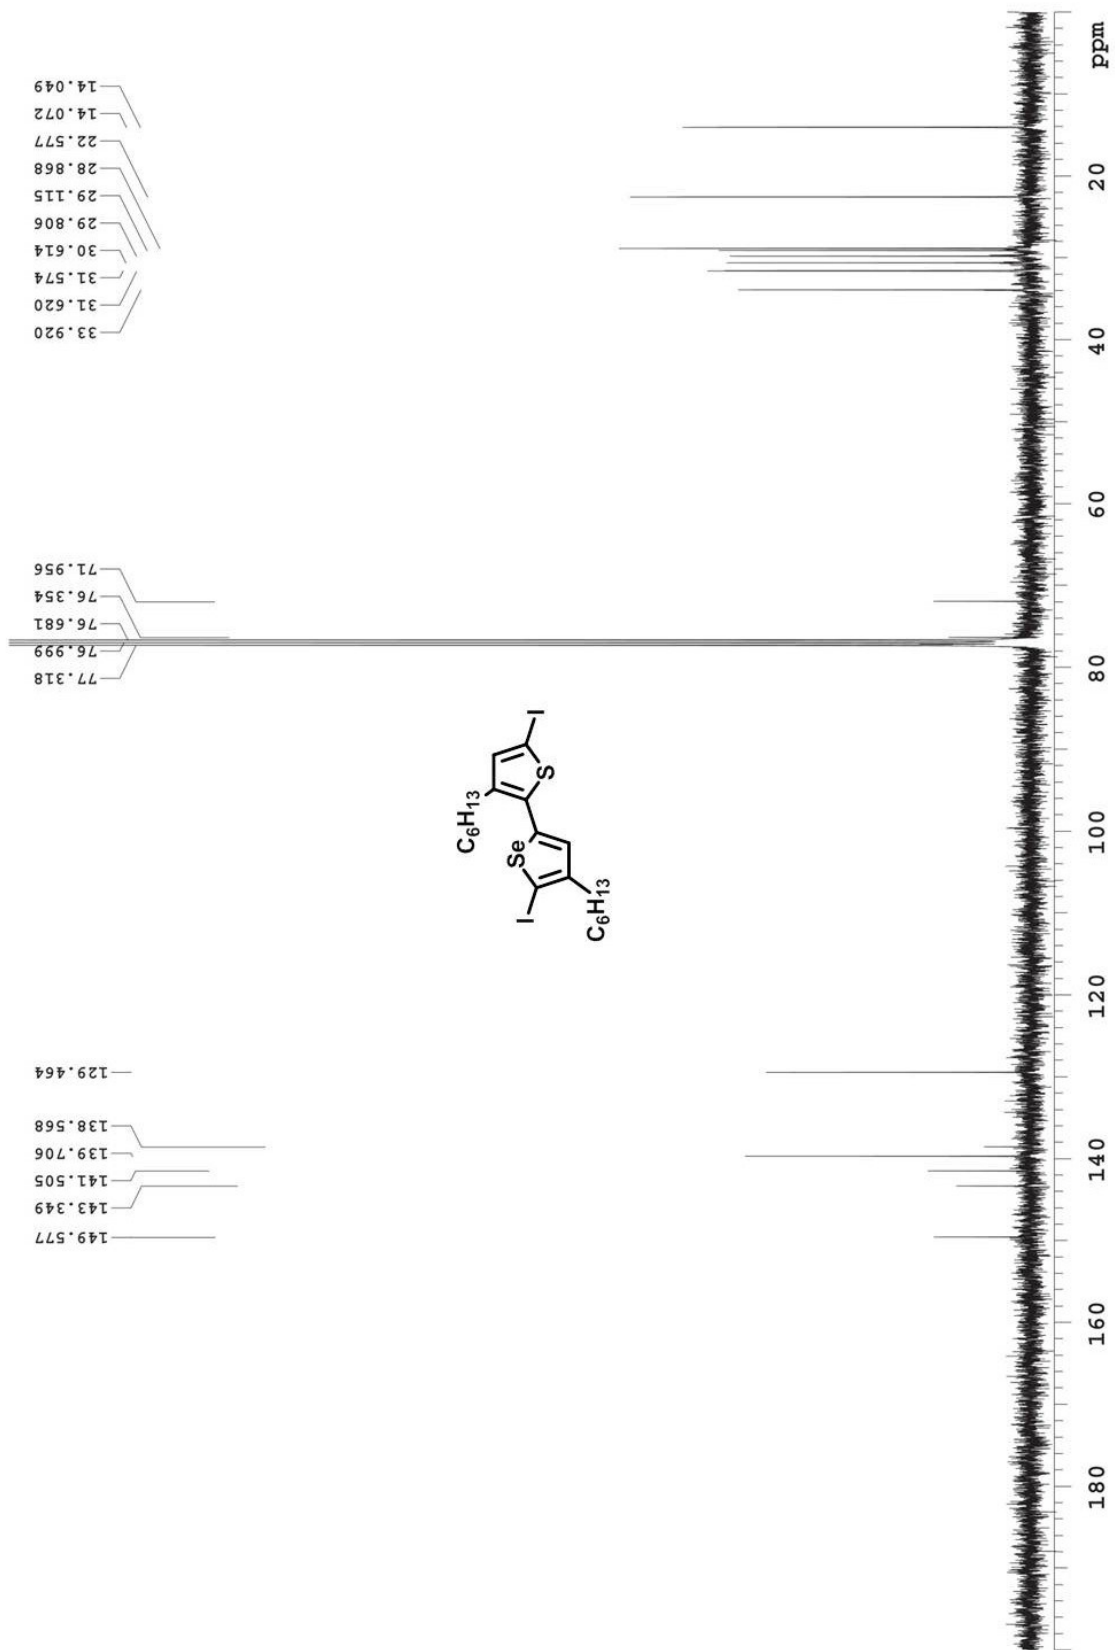

**Figure S20.**  $^{13}\text{C}$  NMR spectrum of  $\text{SSeI}_2$ .  
S30

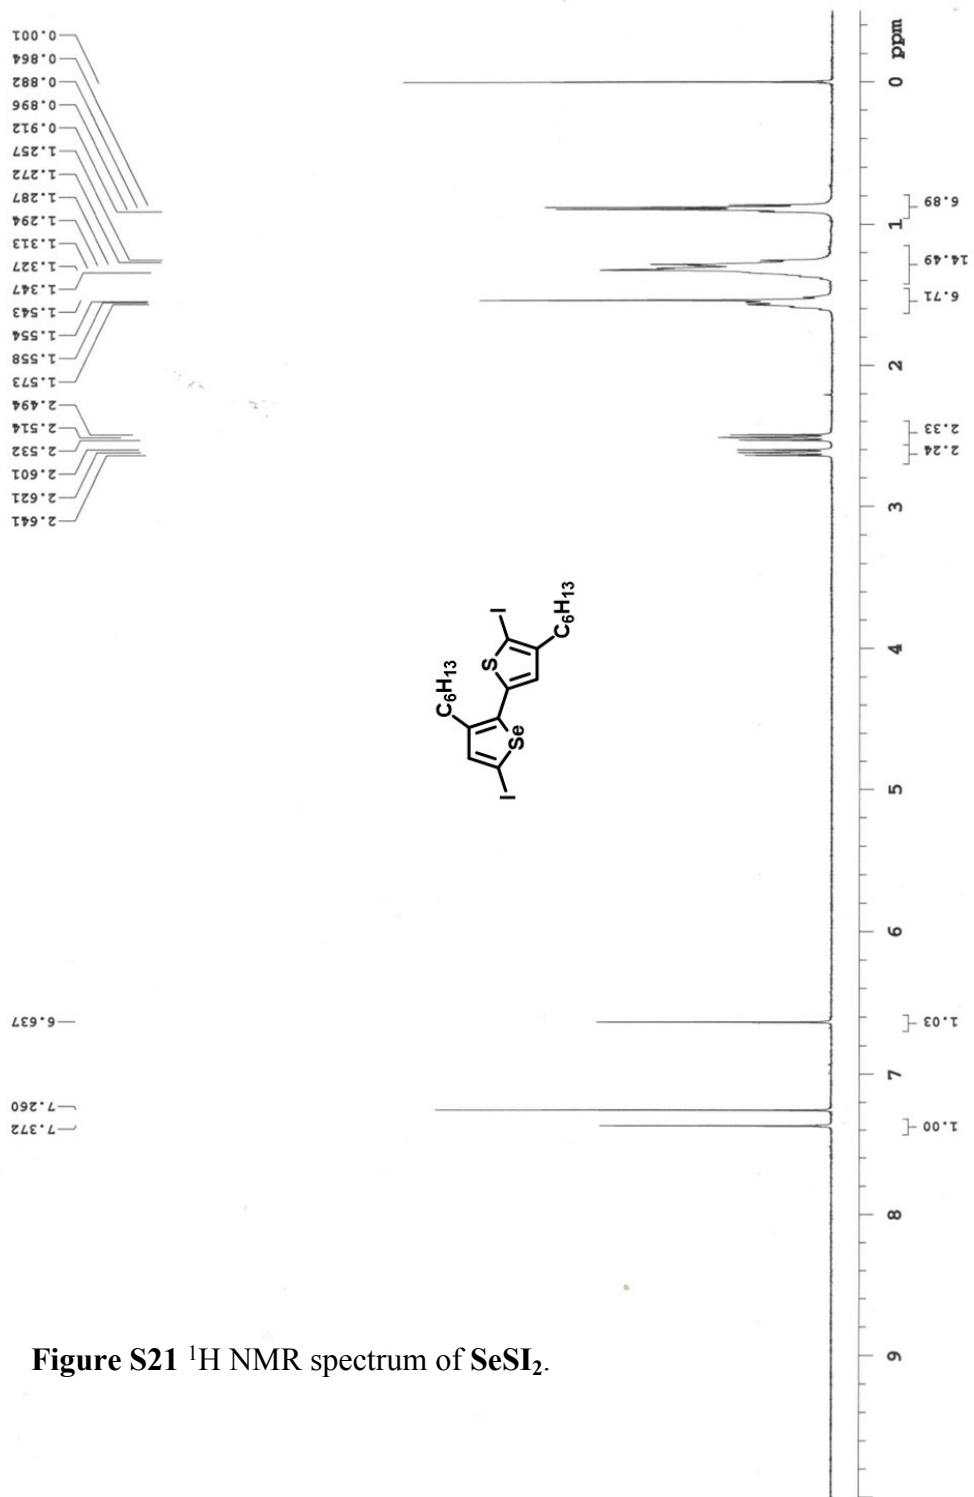

Figure S21 <sup>1</sup>H NMR spectrum of SeSI<sub>2</sub>.

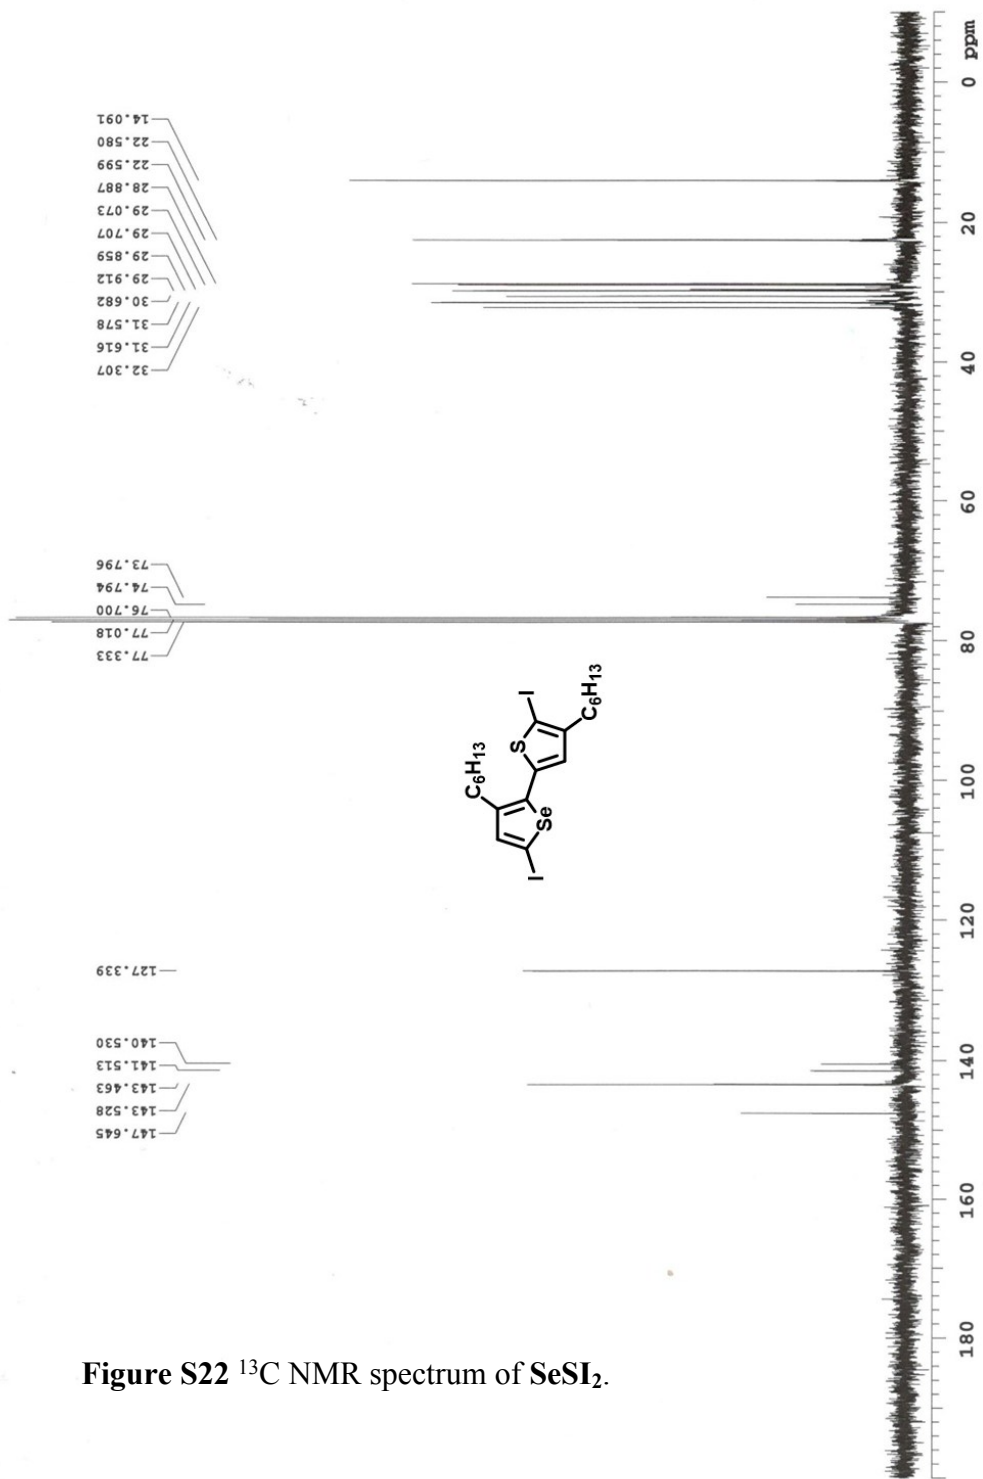

**Figure S22**  $^{13}\text{C}$  NMR spectrum of  $\text{SeSI}_2$ .



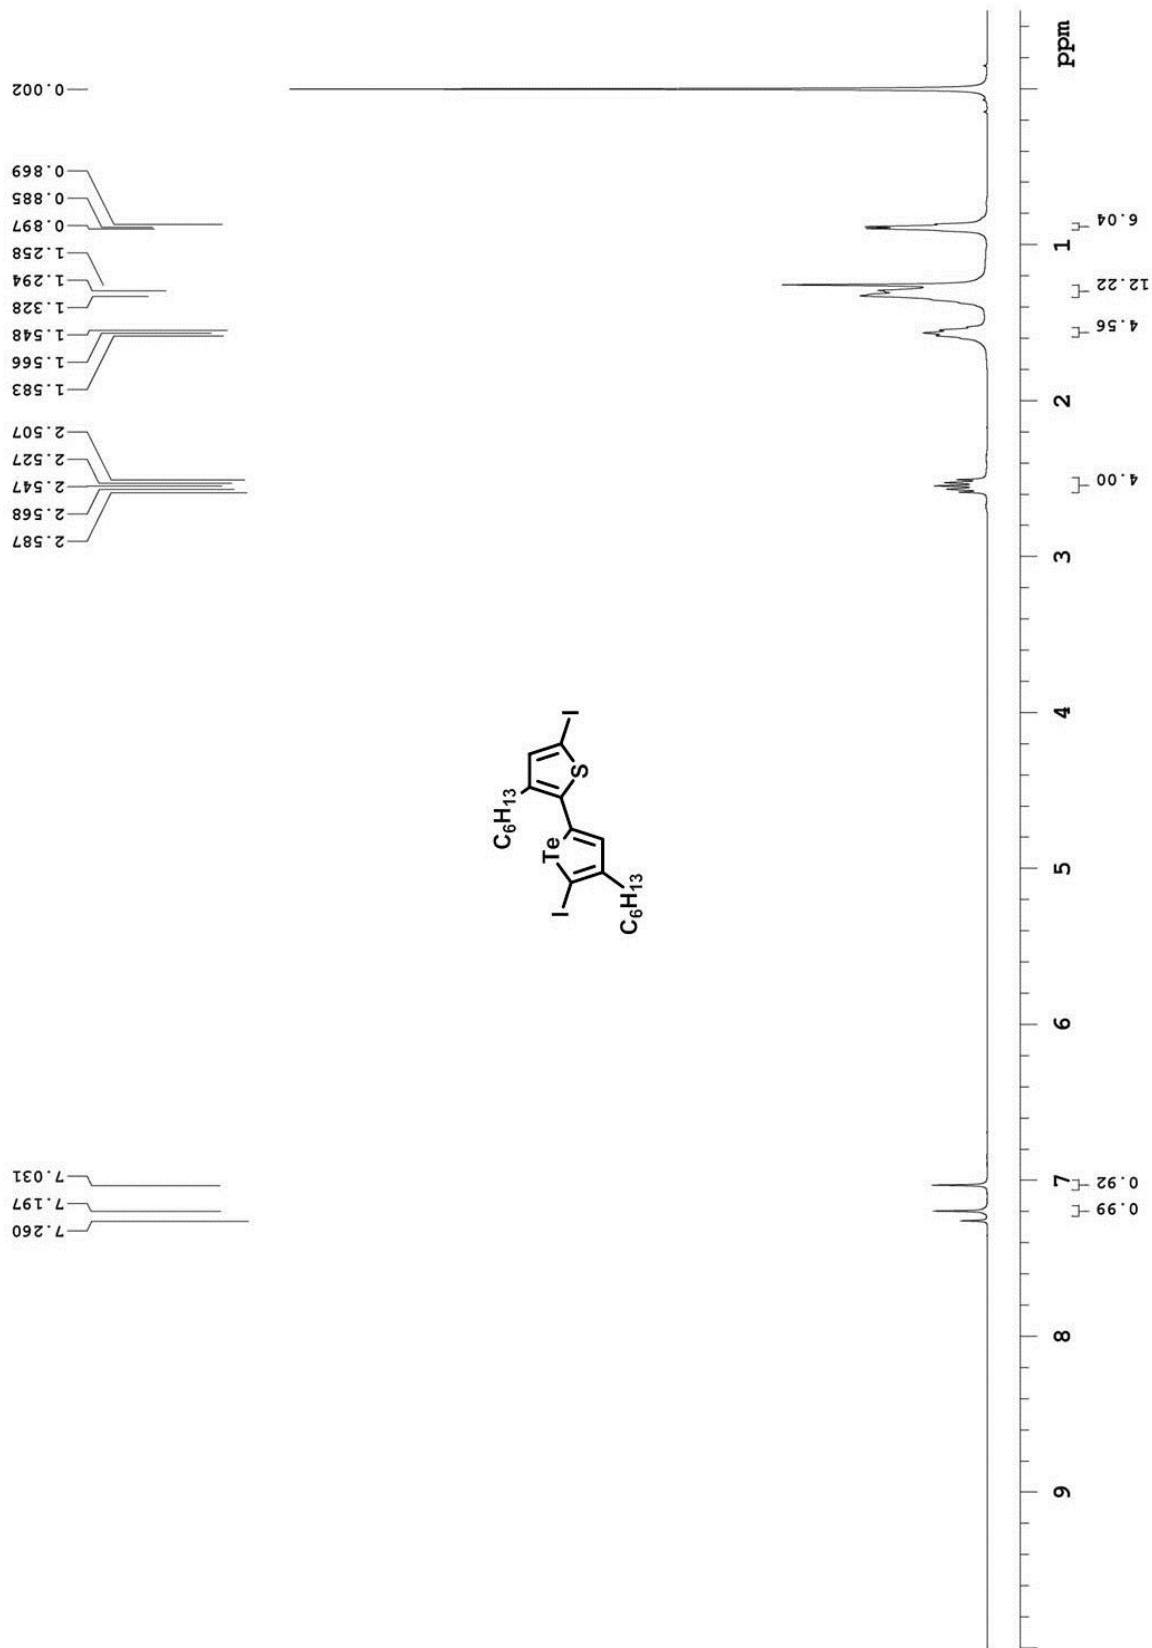

**Figure S23.**  $^1\text{H}$  NMR spectrum of  $\text{STeI}_2$ .

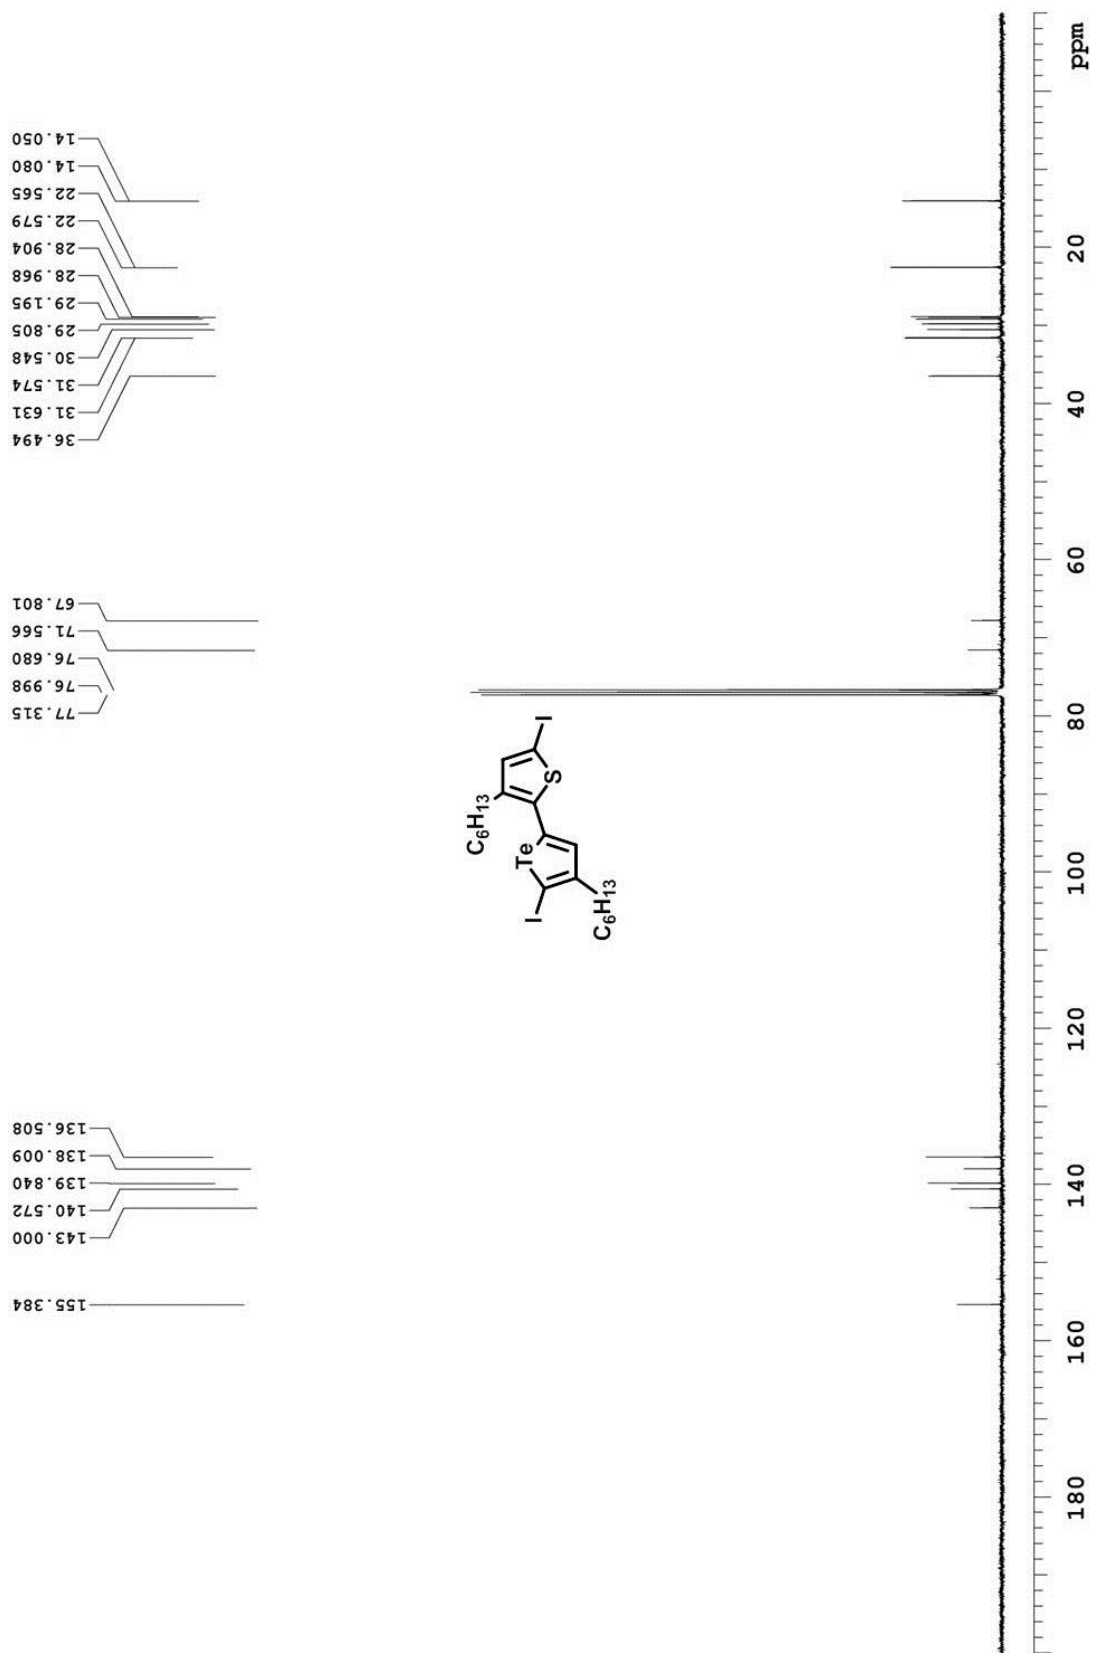

Figure S24.  $^{13}\text{C}$  NMR spectrum of  $\text{STeI}_2$ .  
S34

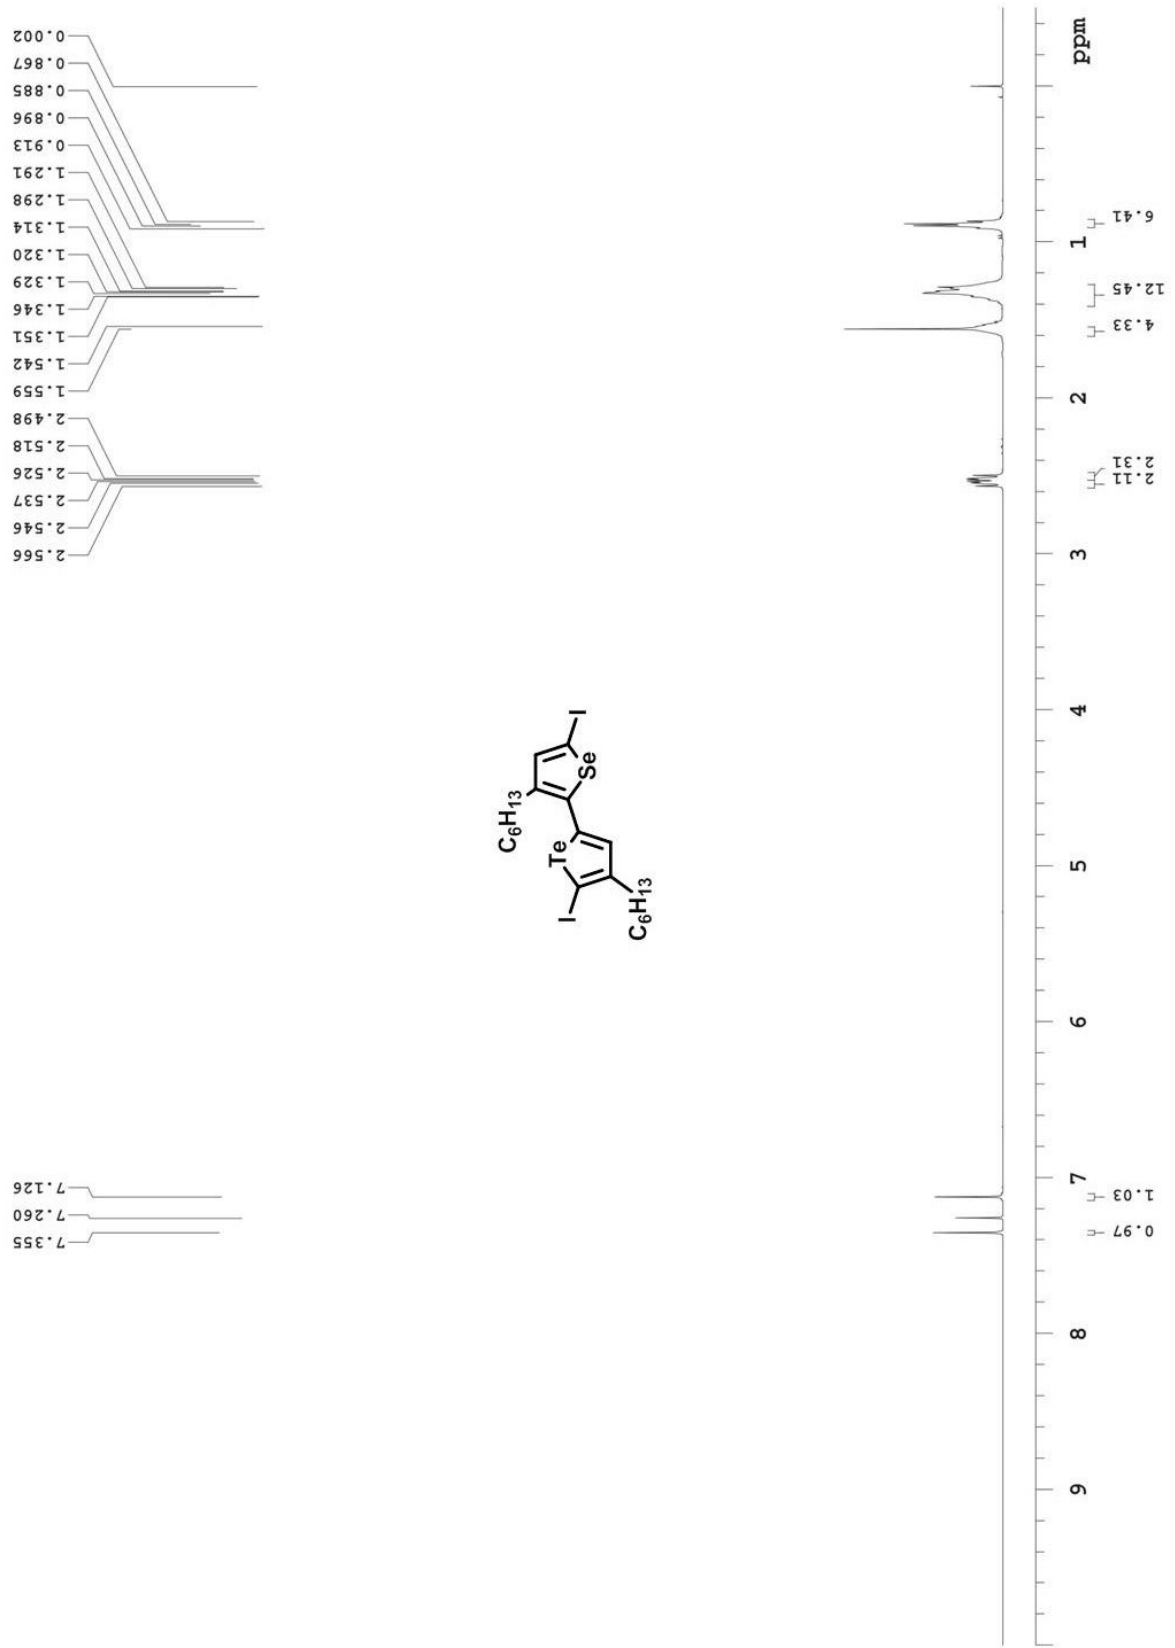

**Figure S25.** <sup>1</sup>H NMR spectrum of SeTeI<sub>2</sub>.  
S35

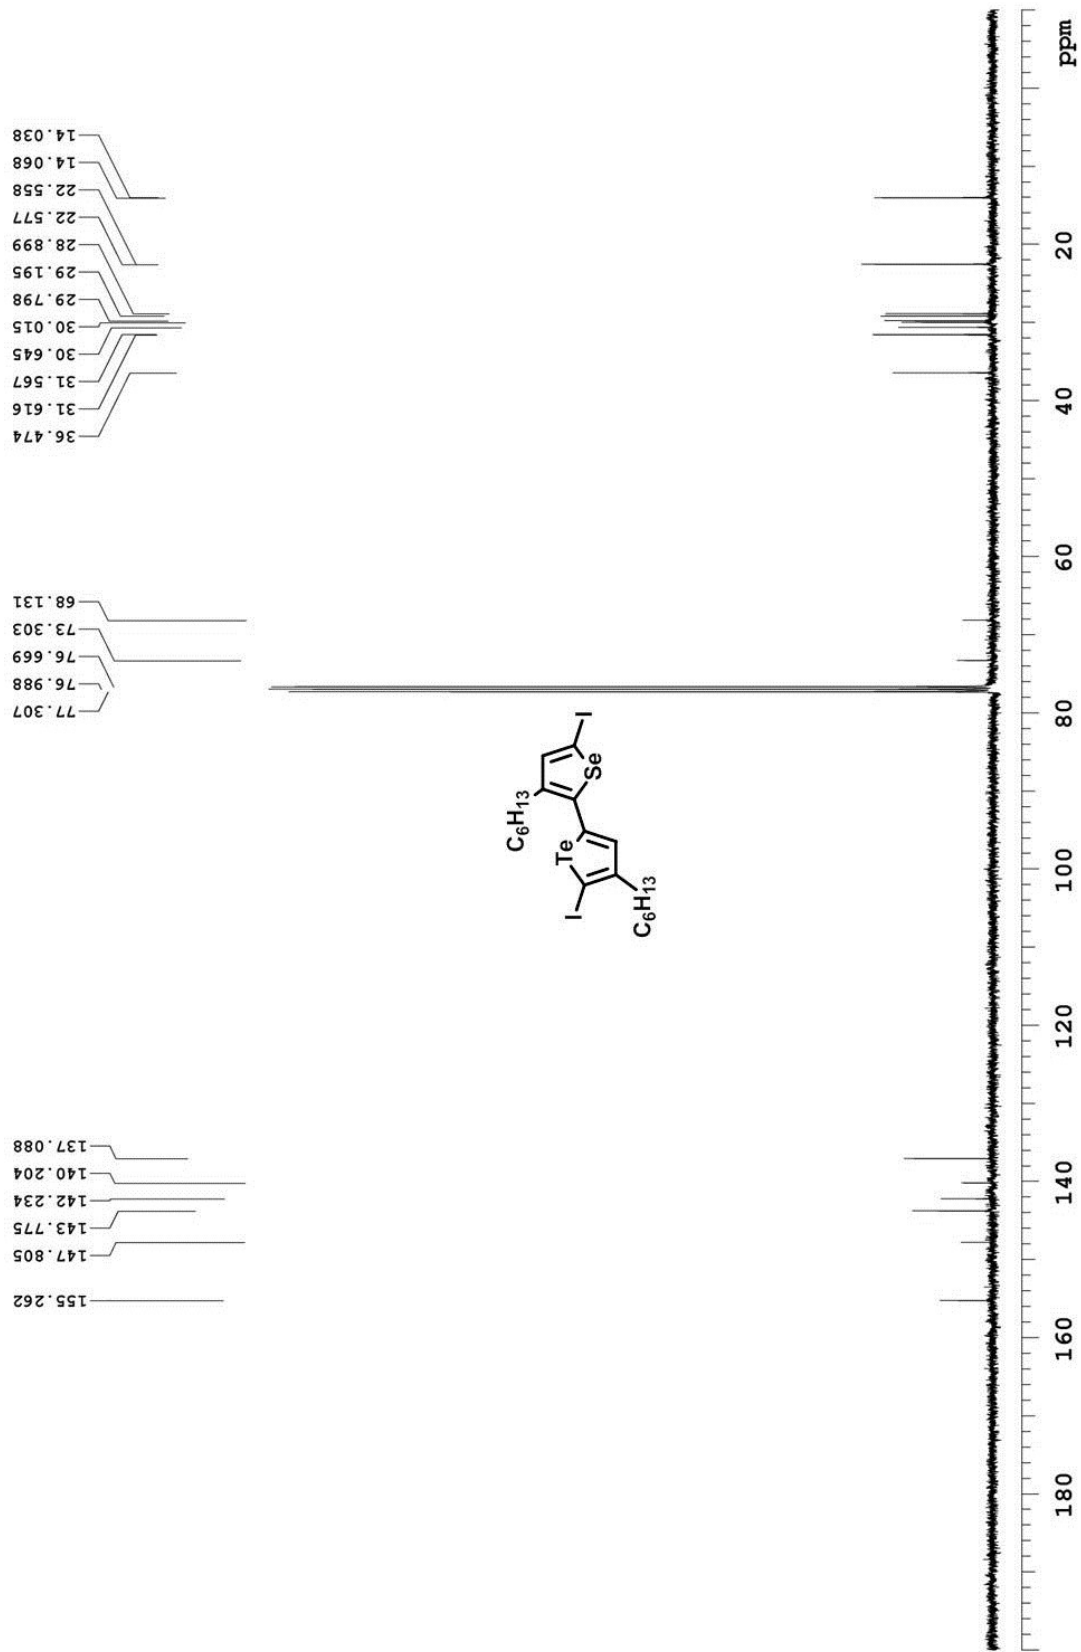

Figure S26.  $^{13}\text{C}$  NMR spectrum of  $\text{SeTeI}_2$ .  
S36

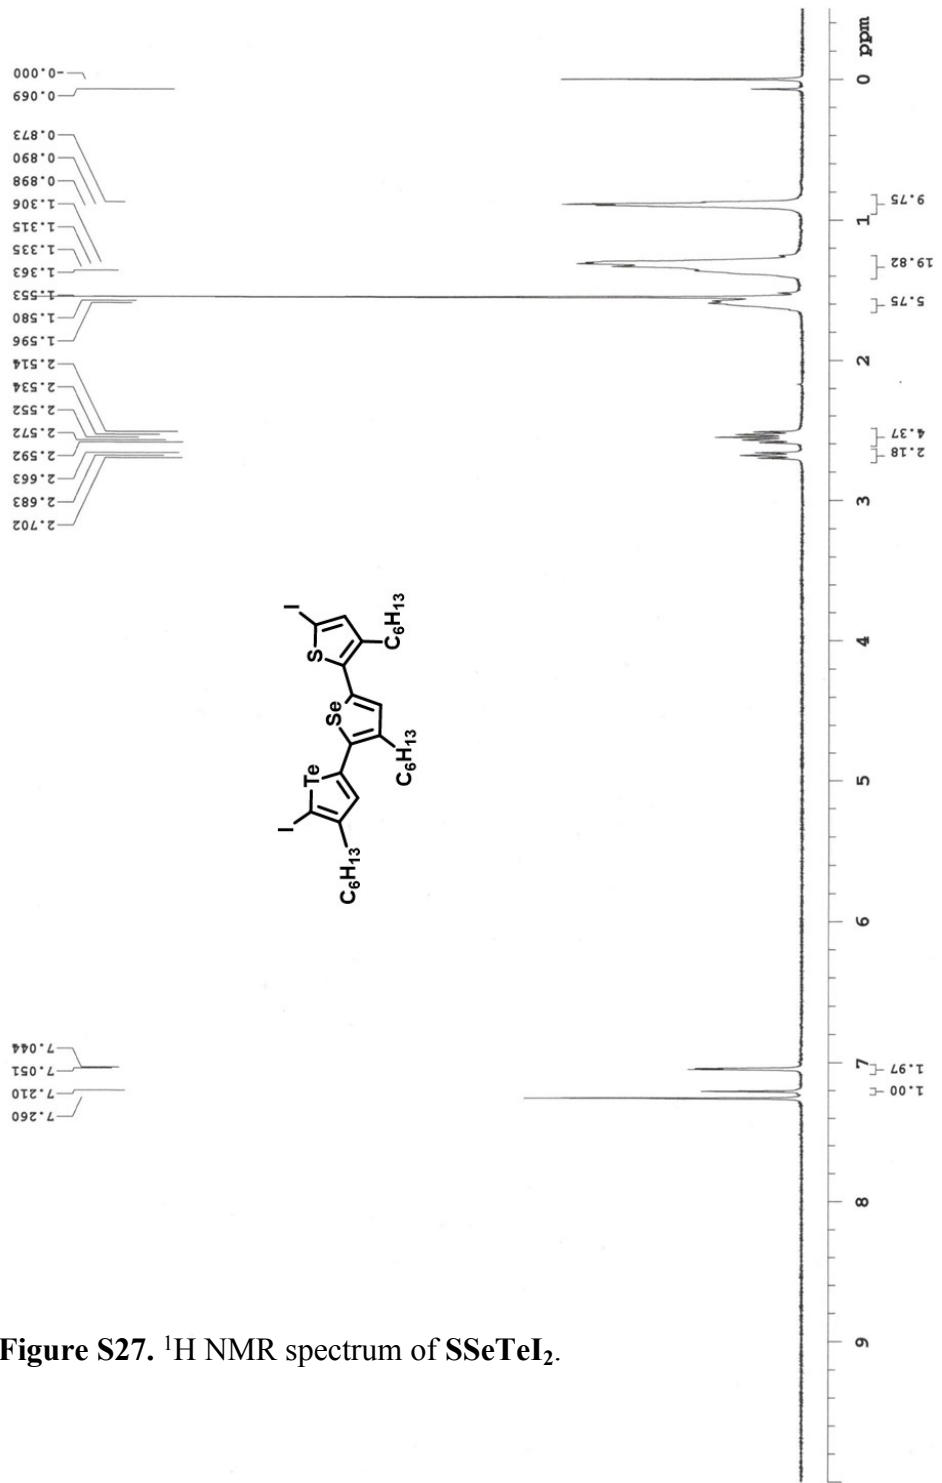

**Figure S27.**  $^1\text{H}$  NMR spectrum of  $\text{SSeTeI}_2$ .

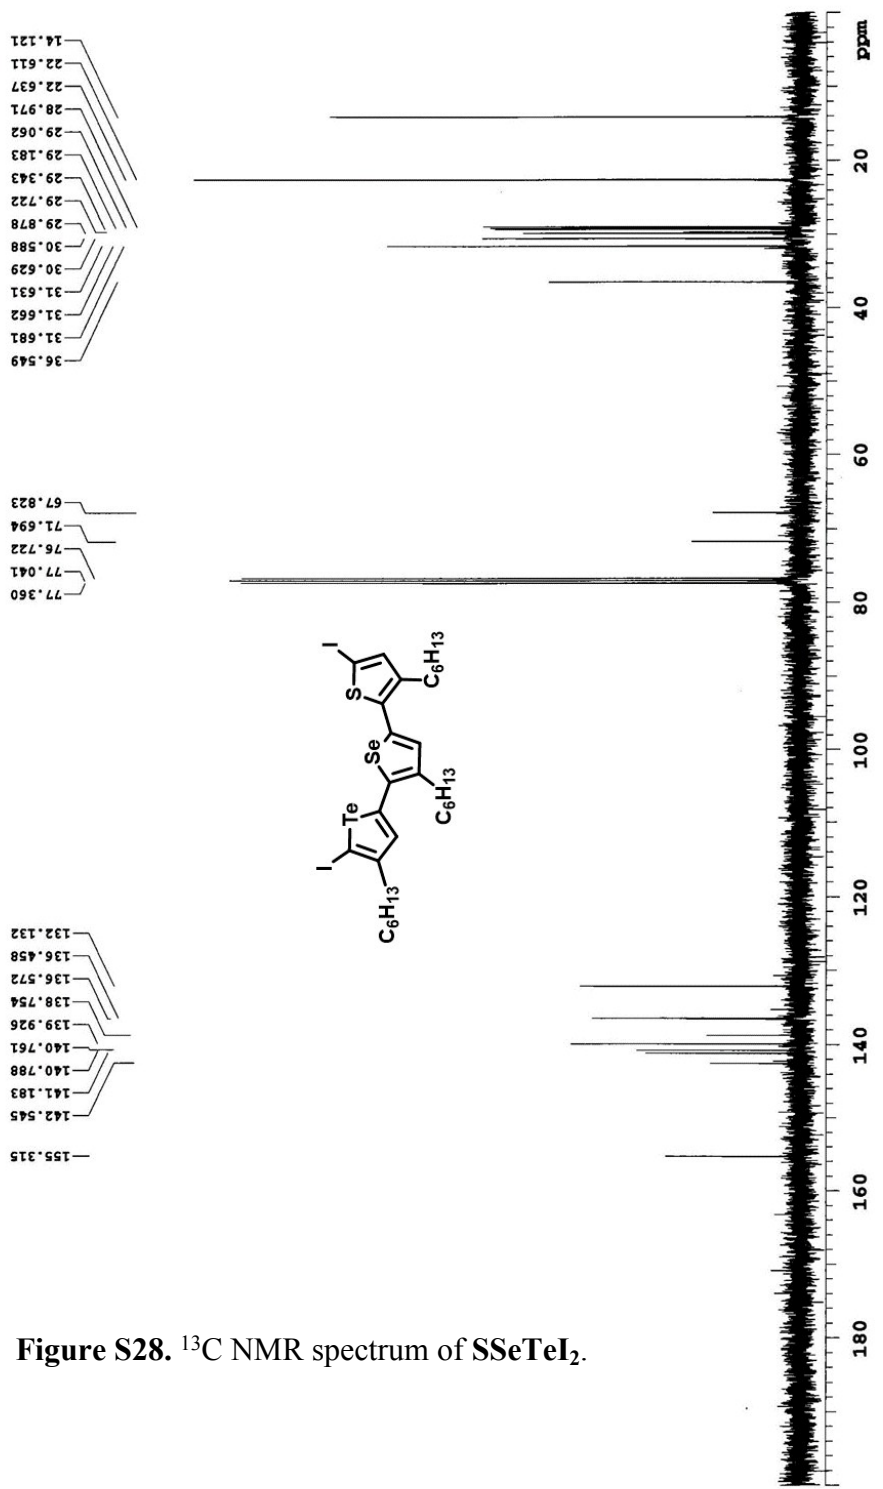

Figure S28. <sup>13</sup>C NMR spectrum of SSeTeI<sub>2</sub>.







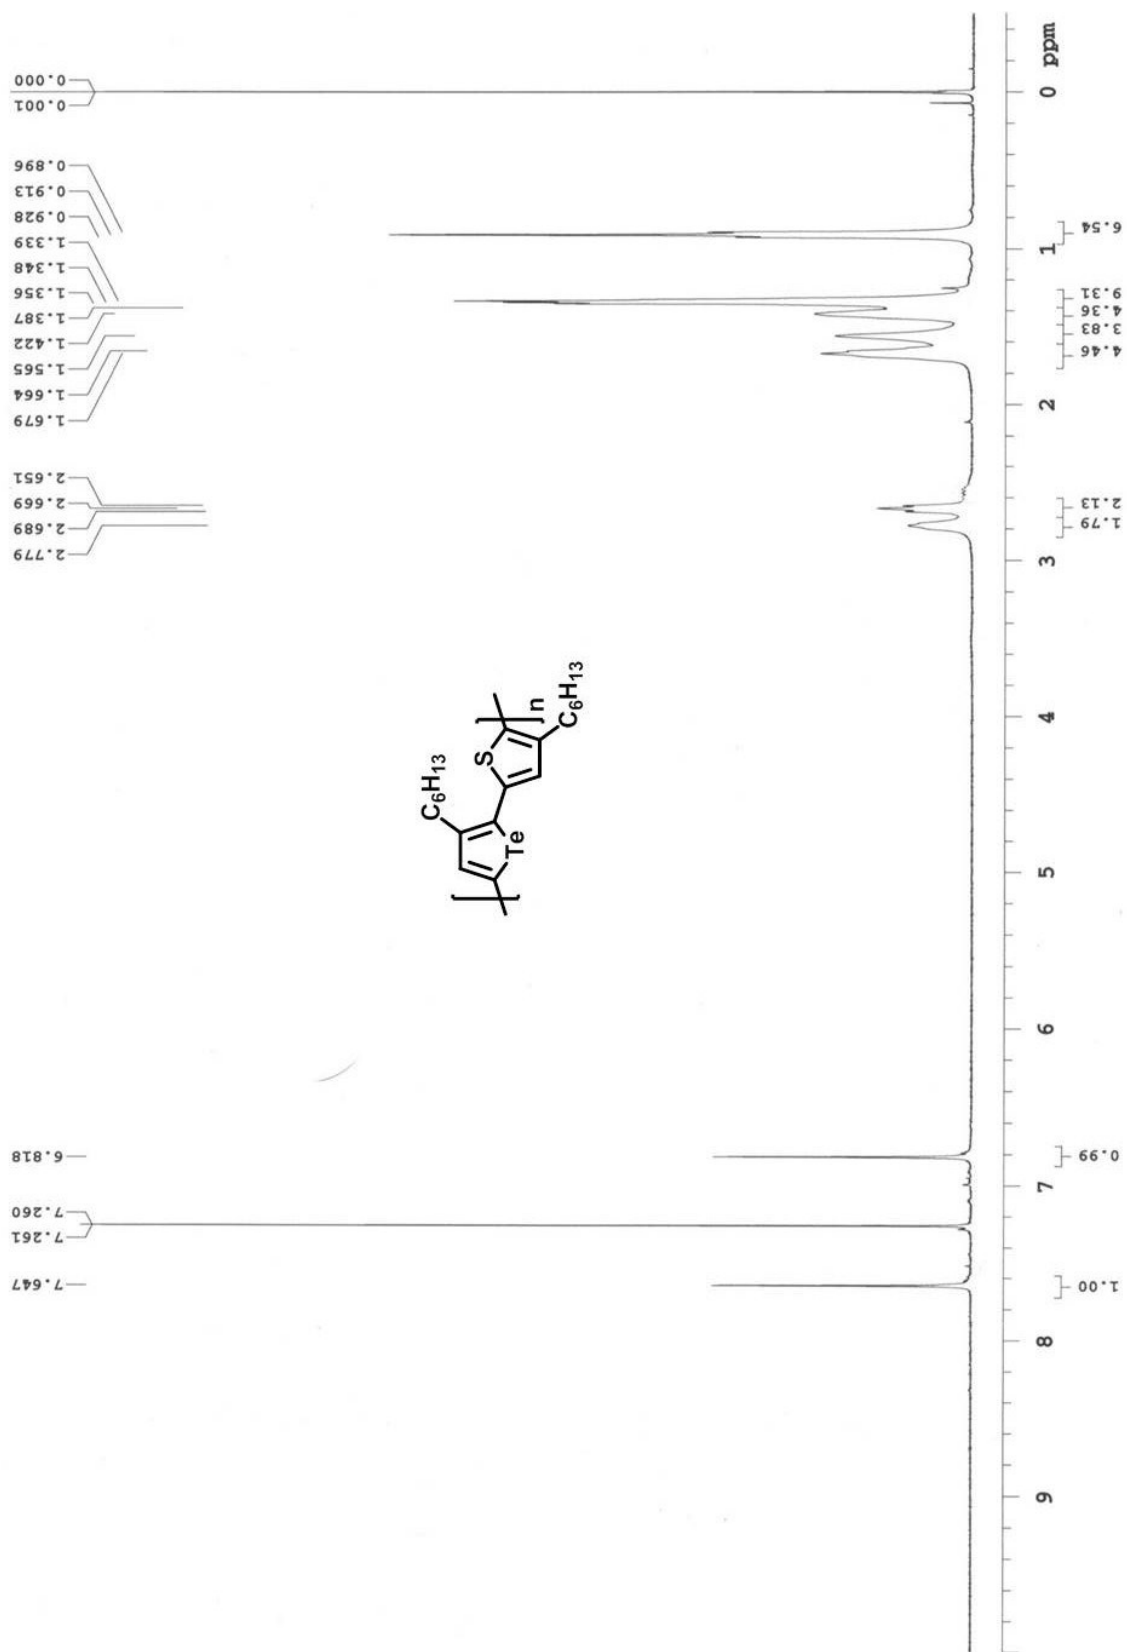

**Figure S31.**  $^1\text{H}$  NMR spectrum of PSTe.

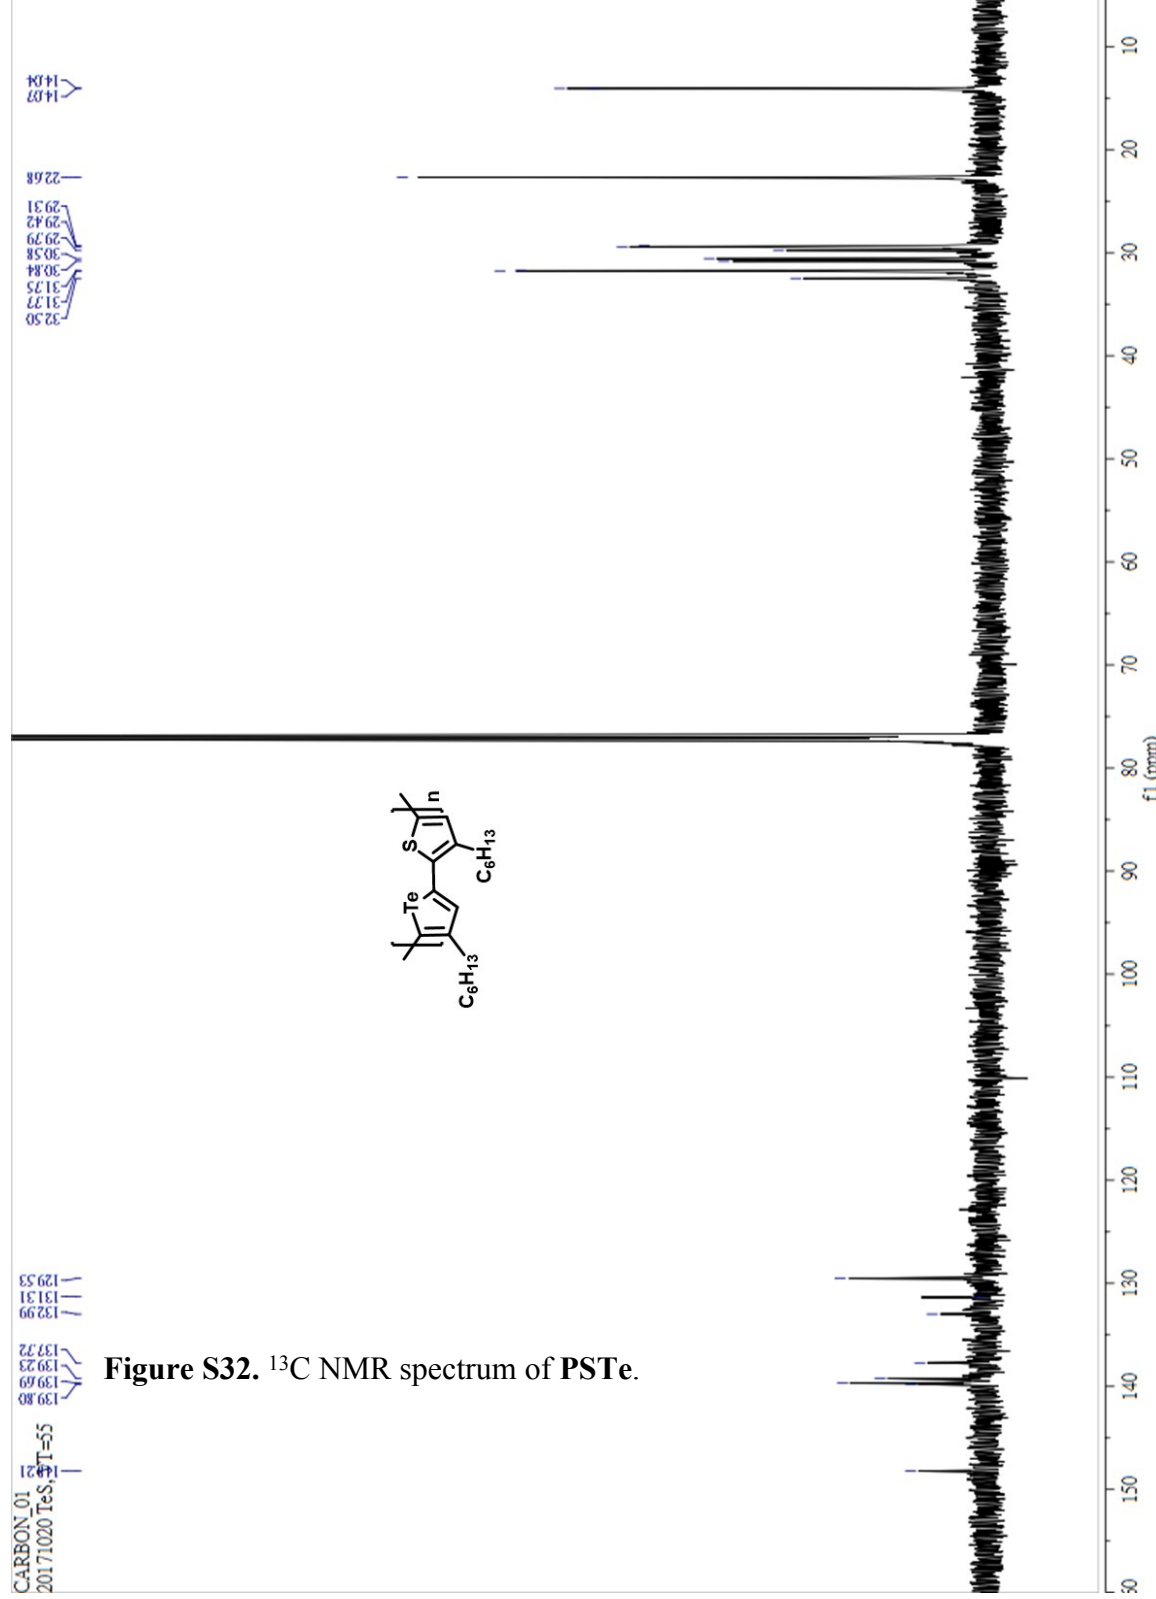

**Figure S32.**  $^{13}\text{C}$  NMR spectrum of PSTe.



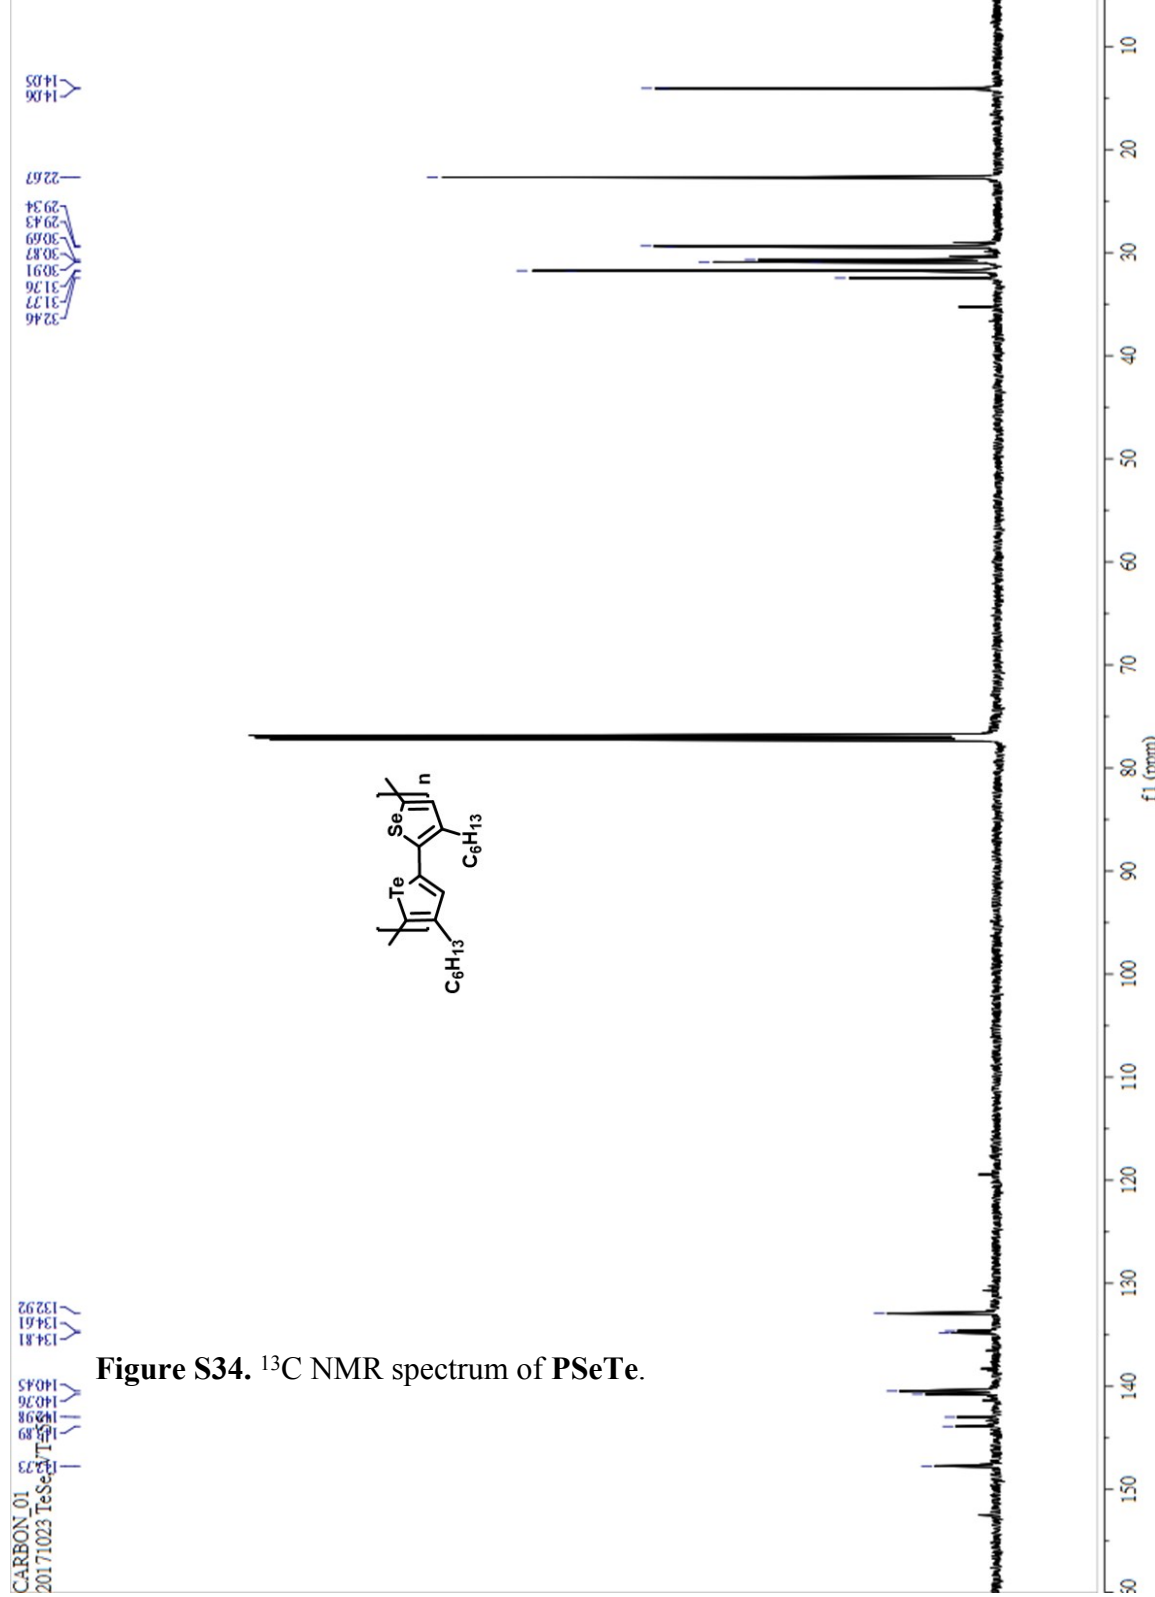

Figure S34.  $^{13}\text{C}$  NMR spectrum of PSeTe.

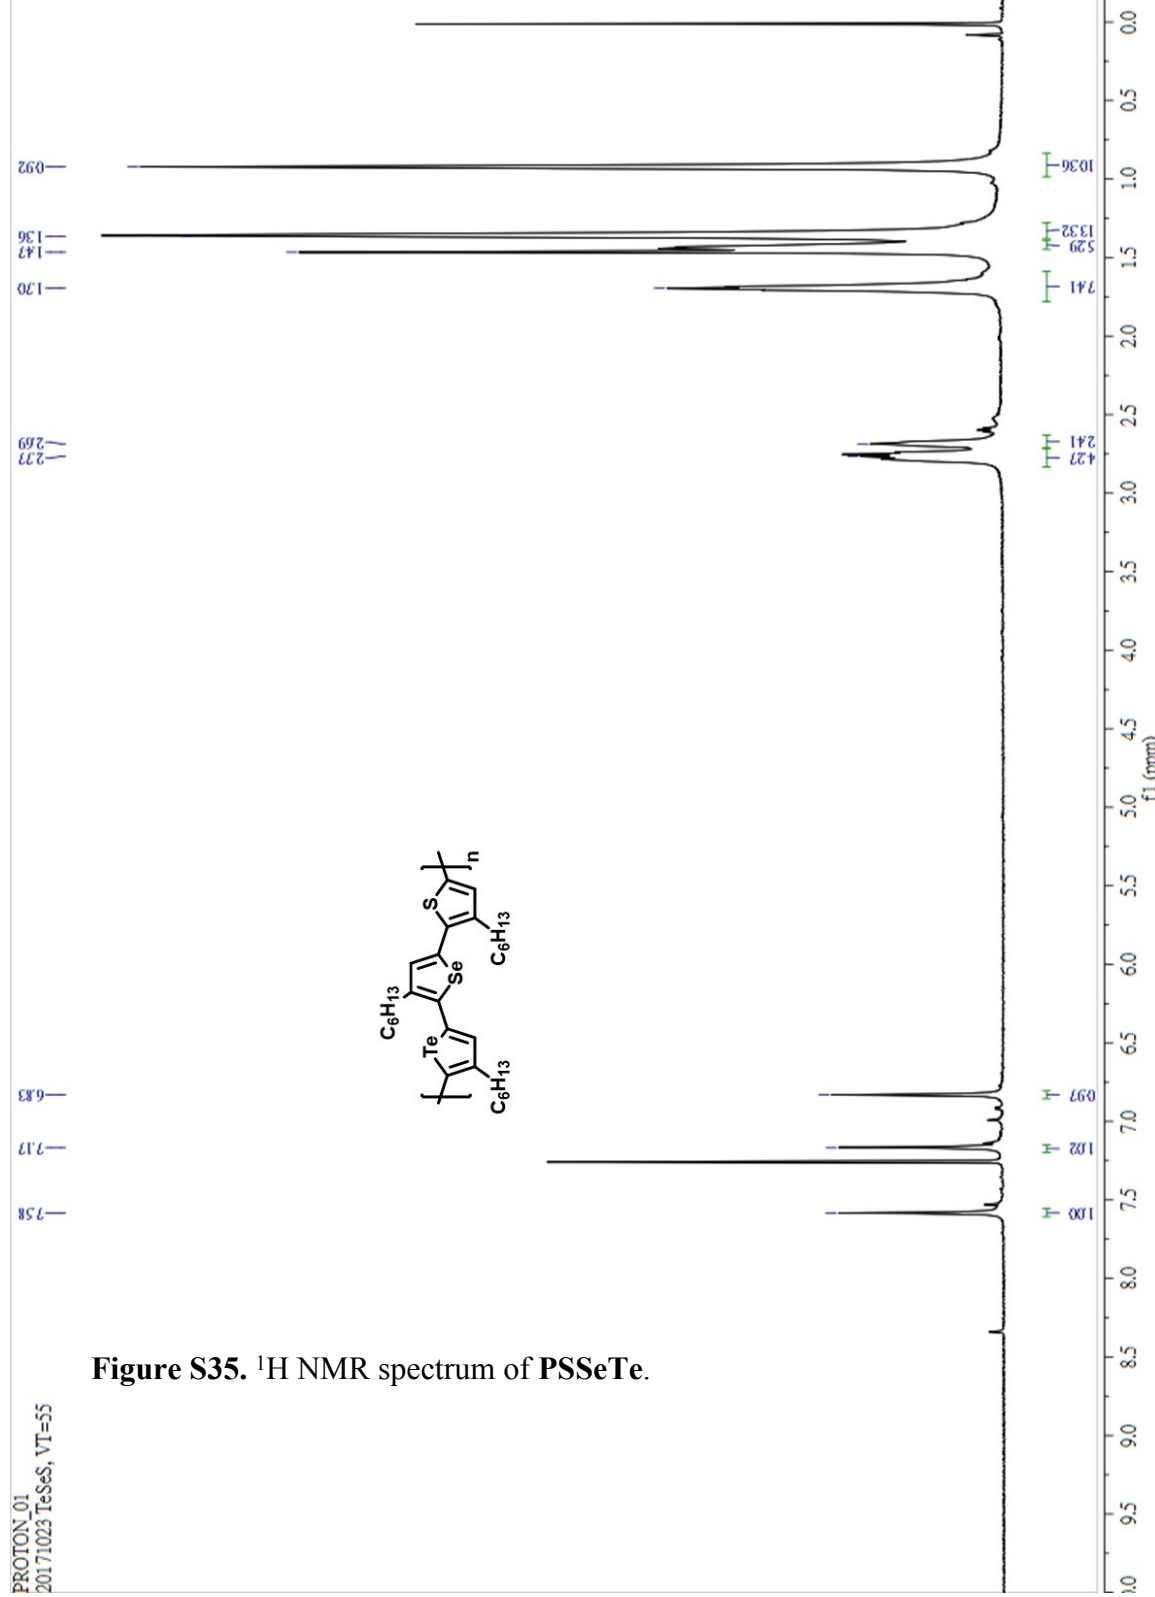

Figure S35.  $^1\text{H}$  NMR spectrum of PSSeTe.



|             | [min]  | [mV]   | [mol]       | Mn      |        |
|-------------|--------|--------|-------------|---------|--------|
| Peak start  | 18.110 | 0.613  | 71,329      | Mw      | 16,492 |
| Peak top    | 19.345 | 11.143 | 25,419      | Mz      | 22,743 |
| Peak end    | 21.460 | 1.817  | 1,900       | Mz+1    | 28,327 |
|             |        |        |             | Mv      | 32,981 |
| Height [mV] |        |        | 10.086      | Mp      | 22,743 |
| Area [mV*s] |        |        | 859.934     | Mz/Mw   | 27,123 |
| Height% [%] |        |        | 100.000     | Mw/Mn   | 1.246  |
| [eta]       |        |        | 22743.15735 | Mz+1/Mw | 1.379  |
|             |        |        |             |         | 1.450  |

**Figure S37.** GPC chromatogram and analysis of **PSSe** (M/Cat. = 50).

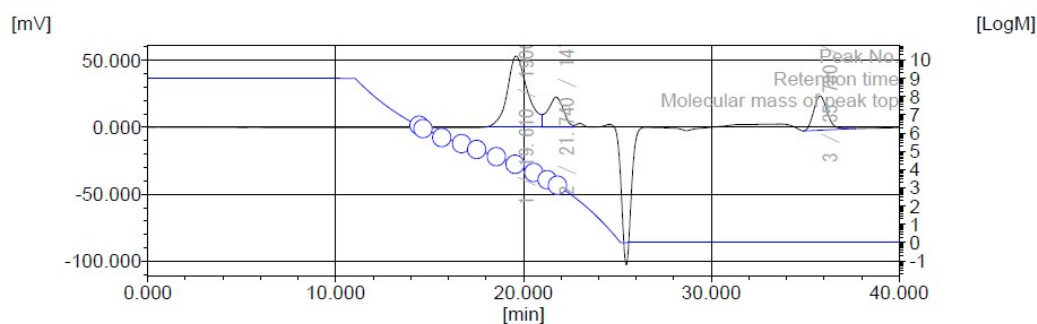

|             | [min]  | [mV]   | [mol]       | Mn      |        |
|-------------|--------|--------|-------------|---------|--------|
| Peak start  | 18.055 | 0.365  | 77,232      | Mw      | 14,422 |
| Peak top    | 19.610 | 53.136 | 19,007      | Mz      | 19,109 |
| Peak end    | 20.980 | 9.391  | 4,156       | Mz+1    | 24,236 |
|             |        |        |             | Mv      | 29,744 |
| Height [mV] |        |        | 52.827      | Mp      | 19,109 |
| Area [mV*s] |        |        | 3887.503    | Mz/Mw   | 19,577 |
| Area% [%]   |        |        | 60.301      | Mw/Mn   | 1.268  |
| [eta]       |        |        | 19109.05046 | Mz+1/Mw | 1.325  |
|             |        |        |             |         | 1.557  |

**Figure S38.** GPC chromatogram and analysis of **PSTe** (M/Cat. = 50).

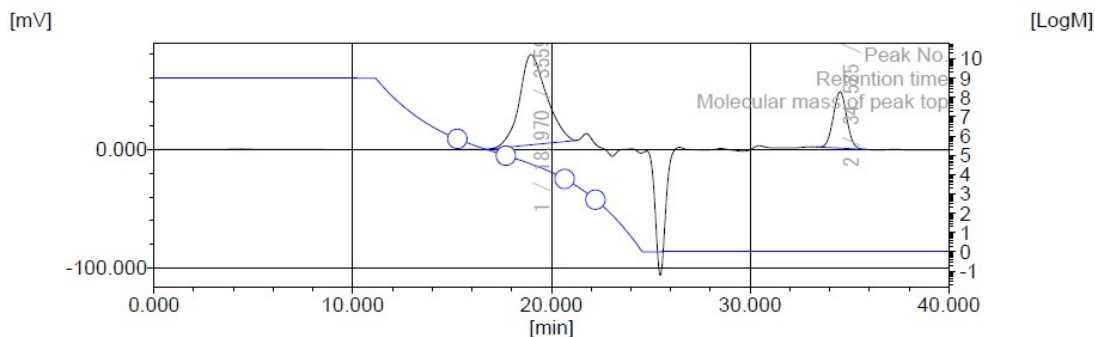

|             | [min]  | [mV]   | [mol]       | Mn      | 23,907 |
|-------------|--------|--------|-------------|---------|--------|
| Peak start  | 16.940 | 0.560  | 170,904     | Mw      | 35,231 |
| Peak top    | 18.970 | 80.033 | 35,597      | Mz      | 47,010 |
| Peak end    | 21.275 | 7.588  | 2,536       | Mz+1    | 59,318 |
|             |        |        |             | Mv      | 35,231 |
| Height [mV] |        |        | 76.182      | Mp      | 37,483 |
| Area [mV*s] |        |        | 7206.998    | Mz/Mw   | 1.334  |
| Height% [%] |        |        | 61.552      | Mw/Mn   | 1.474  |
| [eta]       |        |        | 35231.25895 | Mz+1/Mw | 1.684  |

**Figure S39.** GPC chromatogram and analysis of **PSeTe** (M/Cat. = 50).

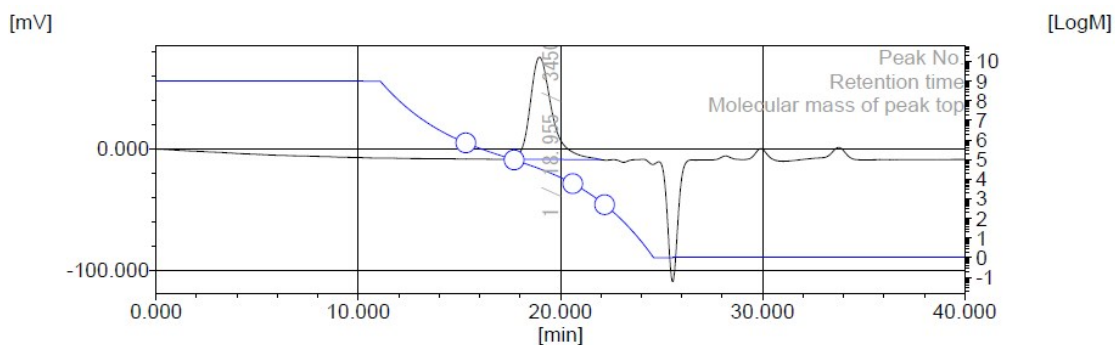

|             | [min]  | [mV]   | [mol]       | Mn      | 20,592 |
|-------------|--------|--------|-------------|---------|--------|
| Peak start  | 17.220 | -8.596 | 140,314     | Mw      | 32,327 |
| Peak top    | 18.955 | 75.662 | 34,504      | Mz      | 39,818 |
| Peak end    | 21.985 | -8.913 | 724         | Mz+1    | 46,365 |
|             |        |        |             | Mv      | 32,327 |
| Height [mV] |        |        | 84.373      | Mp      | 35,438 |
| Area [mV*s] |        |        | 6313.524    | Mz/Mw   | 1.232  |
| Area% [%]   |        |        | 100.000     | Mw/Mn   | 1.570  |
| [eta]       |        |        | 32326.57493 | Mz+1/Mw | 1.434  |

**Figure S40.** GPC chromatogram and analysis of **PSSeTe** (M/Cat. = 50).



## **DFT Computation and Analysis**

### **Computational details.**

Quantum-chemical calculations were performed with the Gaussian09 suite employing the cam-B3LYP density functional in combination with the LANL2DZ(d,P) basis set for the chalcogens, phosphine, and iodine, the LANL2DZ basis set for nickel, and the 6-311G(d,p) basis set for the remaining atoms. Geometry optimizations were performed with tight SCF and convergence criteria and an ultrafine integration grid, applying the GEDIIS optimization algorithm. The nature of each stationary point was confirmed by a frequency analysis.

▪ **3-Hexyl-2-(4-hexyl-5-iodo-selenophen-2-yl)-5-iodo-thiophene**

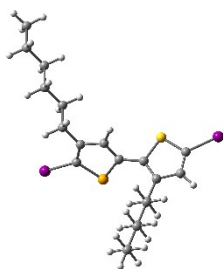

|    |                 |                 |                 |
|----|-----------------|-----------------|-----------------|
| C  | 2.245111877258  | 1.014266772530  | -0.847914146666 |
| C  | 2.164105067687  | 0.359065122688  | 0.340945918701  |
| C  | 0.861144734280  | -0.191349123933 | 0.584402291982  |
| C  | -0.089494763217 | 0.017151855755  | -0.361924668779 |
| H  | 0.640366469535  | -0.735840763442 | 1.495249250091  |
| C  | -1.462595036652 | -0.482448210242 | -0.359709826870 |
| C  | -2.649336795618 | 0.196069071859  | -0.426670762731 |
| C  | -3.776515847383 | -0.681905304343 | -0.391457767545 |
| C  | -3.438018342415 | -1.992331300236 | -0.300937693647 |
| I  | 3.916656667053  | 1.985101234792  | -1.620327103300 |
| I  | -4.738196791028 | -3.606683779194 | -0.217147908423 |
| C  | 3.288077783629  | 0.170587082632  | 1.320375615693  |
| H  | 3.995486948975  | 0.998654874408  | 1.236345992087  |
| H  | 2.881460109646  | 0.209410388717  | 2.335561190996  |
| C  | 4.031943269486  | -1.154846301063 | 1.122346659616  |
| H  | 4.436962913011  | -1.186591243538 | 0.105827672992  |
| H  | 3.320086417979  | -1.984164768518 | 1.194483903218  |
| H  | -4.799829399433 | -0.334159440130 | -0.429216148277 |
| C  | -2.804650623827 | 1.691132533370  | -0.452772437162 |
| H  | -1.859240484269 | 2.160828677891  | -0.729173470192 |
| H  | -3.527062427079 | 1.962470139150  | -1.229745155240 |
| C  | -3.270803278443 | 2.261797535225  | 0.891613441318  |
| H  | -2.540432405336 | 1.993732239817  | 1.661889102278  |
| H  | -4.212767850172 | 1.785897356740  | 1.184684158810  |
| Se | 0.634837006907  | 0.986267660903  | -1.807212911481 |
| C  | 5.158080290178  | -1.357534313159 | 2.130836726351  |
| H  | 5.865614775559  | -0.523506478269 | 2.055303749994  |

|   |                 |                 |                 |
|---|-----------------|-----------------|-----------------|
| H | 4.747759594097  | -1.317563881571 | 3.146961882944  |
| C | 5.907294953074  | -2.672841580012 | 1.941407974251  |
| H | 5.199963998008  | -3.507325434060 | 2.016099090452  |
| H | 6.317206838473  | -2.712946512941 | 0.925377810434  |
| C | 7.036142519325  | -2.879998413161 | 2.947093427489  |
| H | 6.626049173873  | -2.839830457717 | 3.962085966232  |
| H | 7.742597447038  | -2.046253685308 | 2.871781204986  |
| C | 7.778599074956  | -4.197047579936 | 2.748860612972  |
| H | 7.102141510234  | -5.049714562662 | 2.851521872724  |
| H | 8.226666373376  | -4.250274591627 | 1.753109142483  |
| C | -3.452626531820 | 3.775881922375  | 0.859487750079  |
| H | -2.507803722774 | 4.247464447825  | 0.565237373914  |
| H | -4.178813557151 | 4.037786571778  | 0.080721617702  |
| C | -3.912324376921 | 4.357069018722  | 2.192971915888  |
| H | -4.857323160716 | 3.885590257341  | 2.488046846206  |
| H | -3.186571276522 | 4.094928543788  | 2.971850532115  |
| C | -4.094218493870 | 5.871925374891  | 2.165482537448  |
| H | -4.819148886588 | 6.133382295613  | 1.386978641950  |
| H | -3.149796768709 | 6.342314232834  | 1.871253595287  |
| C | -4.553676986395 | 6.442939244036  | 3.502639372265  |
| H | -4.675637234408 | 7.527035554763  | 3.454797871283  |
| H | -5.512513973010 | 6.013847279235  | 3.805499077493  |
| H | -3.830775653861 | 6.224628289139  | 4.293154130262  |
| H | 8.580080911221  | -4.319388011710 | 3.480380345916  |
| S | -1.720408656148 | -2.212869320444 | -0.262827034119 |

**3-Hexyl-2-(4-hexyl-5-iodo-tellurophen-2-yl)-5-iodo-thiophene**

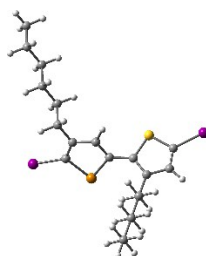

|    |                 |                 |                 |   |                 |                 |                 |
|----|-----------------|-----------------|-----------------|---|-----------------|-----------------|-----------------|
| C  | 2.589986013958  | 0.924787331284  | -0.666955046670 | C | -2.917398813433 | 4.192059486188  | 1.151722916932  |
| C  | 2.329648340393  | 0.272140754498  | 0.494142085521  | H | -1.969878319088 | 4.592070896267  | 0.772368321937  |
| C  | 0.952571634589  | -0.116167265007 | 0.685468121416  | H | -3.690257190282 | 4.518951324485  | 0.445795832941  |
| C  | 0.017719656443  | 0.190550098552  | -0.246134421665 | C | -3.203598980407 | 4.791503440974  | 2.525078800172  |
| H  | 0.667255814951  | -0.642667219155 | 1.591058375976  | H | -4.150940968440 | 4.391371083507  | 2.905616123130  |
| C  | -1.390989795672 | -0.195377155111 | -0.199311874568 | H | -2.431031659063 | 4.464615398361  | 3.231002852302  |
| C  | -2.522637284713 | 0.574927090491  | -0.218149520871 | C | -3.267838555641 | 6.316122327090  | 2.521592716804  |
| C  | -3.714694280267 | -0.210167820587 | -0.147430012779 | H | -4.039900162536 | 6.642310483760  | 1.816254393204  |
| C  | -3.480005634730 | -1.544431292122 | -0.079760882414 | H | -2.321187917410 | 6.715123527205  | 2.141556811760  |
| I  | 4.459909551600  | 1.640266208108  | -1.262631090524 | C | -3.553471807059 | 6.905306740916  | 3.898704345338  |
| I  | -4.902142785927 | -3.050502215348 | 0.034916961433  | H | -3.593943252437 | 7.996094801292  | 3.867398569098  |
| C  | 3.351003808015  | -0.085815174921 | 1.540464638211  | H | -4.510312654063 | 6.548468715453  | 4.289013114337  |
| H  | 4.170288596572  | 0.635820963215  | 1.522700478663  | H | -2.778874968698 | 6.622191053261  | 4.616335416970  |
| H  | 2.886063592809  | -0.006468304426 | 2.527942841673  | H | 7.814371542392  | -5.302305424939 | 3.925707260672  |
| C  | 3.914950293295  | -1.499242713485 | 1.357812651043  | S | -1.784942656436 | -1.901150776289 | -0.104492267539 |
| H  | 4.378935452419  | -1.571382560595 | 0.368994799353  |   |                 |                 |                 |
| H  | 3.092057669143  | -2.222181496578 | 1.363802434147  |   |                 |                 |                 |
| H  | -4.707238066201 | 0.219439058041  | -0.144684031077 |   |                 |                 |                 |
| C  | -2.559402984571 | 2.077638759654  | -0.224058625632 |   |                 |                 |                 |
| H  | -1.607957226602 | 2.475587933930  | -0.581813140224 |   |                 |                 |                 |
| H  | -3.325684370590 | 2.414808899367  | -0.929882911740 |   |                 |                 |                 |
| C  | -2.852898070242 | 2.668206173415  | 1.160096419690  |   |                 |                 |                 |
| H  | -2.077676143719 | 2.334901502532  | 1.857522770830  |   |                 |                 |                 |
| H  | -3.798189957875 | 2.262759436919  | 1.536594742045  |   |                 |                 |                 |
| Te | 0.912569253833  | 1.168170369801  | -1.845010123792 |   |                 |                 |                 |
| C  | 4.931980708415  | -1.872719709297 | 2.431396413388  | C | -3.053546601961 | -0.129508424419 | -0.143181949108 |
| H  | 5.751295262105  | -1.144361482131 | 2.422066840791  | C | -2.448415145328 | -0.940832817302 | -1.047271096265 |
| H  | 4.46377734435   | -1.791690897709 | 3.419672066981  | C | -1.013773970596 | -0.802344867113 | -1.134377441584 |
| C  | 5.503579733056  | -3.276509050873 | 2.258304690138  | C | -0.363726917257 | 0.102402843235  | -0.363689271577 |
| H  | 4.684521785049  | -4.005435926993 | 2.266793073103  | H | -0.458854288807 | -1.419099117212 | -1.834799725496 |
| H  | 5.971413145839  | -3.357631734952 | 1.270121396035  | C | 1.081636386579  | 0.312956954233  | -0.317675410306 |
| C  | 6.522900931458  | -3.654108423686 | 3.329271985735  | C | 1.811110795420  | 1.408963630685  | -0.676255704831 |
| H  | 6.054929443072  | -3.572848941246 | 4.316388415125  | C | 3.227502596474  | 1.263804784324  | -0.494327357235 |
| H  | 7.340927506213  | -2.925665322184 | 3.320109842694  | C | 3.636557324402  | 0.075103804229  | 0.005021651315  |
| C  | 7.088511693989  | -5.058430847041 | 3.147160710061  | I | -5.106089290918 | -0.060112992527 | 0.239810551620  |
| H  | 6.295656563507  | -5.810185629898 | 3.184921907718  | I | 5.605108634572  | -0.467301201139 | 0.388438213397  |
| H  | 7.591038778548  | -5.158159473993 | 2.181419812133  | C | -3.146376289008 | -1.959267397754 | -1.908607884146 |

### 3-Hexyl-2-(4-hexyl-5-iodo-telluromphen-2-yl)-5-iodo-selenophene

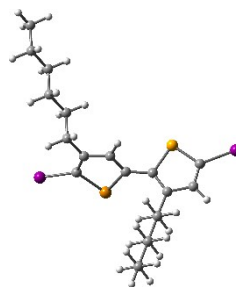

|    |                 |                 |                 |   |                 |                 |                 |
|----|-----------------|-----------------|-----------------|---|-----------------|-----------------|-----------------|
| H  | -4.173996234621 | -1.643255128397 | -2.099413051307 | H | 1.749457032185  | 5.341065465080  | -7.346899029615 |
| H  | -2.646311568006 | -1.999814619204 | -2.881183556754 | H | 0.187222983485  | 4.553094809302  | -7.568186097371 |
| C  | -3.153253248644 | -3.358664781118 | -1.283561849310 | H | -5.055156575969 | -8.950707620738 | -2.456368905260 |
| H  | -3.654006664730 | -3.310869757005 | -0.311338368441 |   |                 |                 |                 |
| H  | -2.122942645341 | -3.671886357016 | -1.082833548424 |   |                 |                 |                 |
| H  | 3.918934129980  | 2.058315433968  | -0.745098617433 |   |                 |                 |                 |
| C  | 1.237242946367  | 2.658202019755  | -1.288611861848 |   |                 |                 |                 |
| H  | 0.170774244348  | 2.727713099957  | -1.066584857205 |   |                 |                 |                 |
| H  | 1.711774756400  | 3.532490341595  | -0.830641138690 |   |                 |                 |                 |
| C  | 1.432744275700  | 2.715709625576  | -2.808112173594 |   |                 |                 |                 |
| H  | 0.946667271453  | 1.844669963830  | -3.259251066518 |   |                 |                 |                 |
| H  | 2.498877184235  | 2.627253048576  | -3.043426278659 |   |                 |                 |                 |
| Te | -1.721813700851 | 1.083291212692  | 0.865598049007  |   |                 |                 |                 |
| Se | 2.195171878189  | -1.071735367718 | 0.327135983848  |   |                 |                 |                 |
| C  | -3.840643913177 | -4.396223034855 | -2.165292461174 | C | 2.096932573068  | 0.912704465657  | -0.827197553938 |
| H  | -4.870158690018 | -4.076209484182 | -2.364103544095 | C | 2.068105494431  | 0.292326307600  | 0.386638532727  |
| H  | -3.339929388456 | -4.434082592896 | -3.140132285942 | C | 0.779285241790  | -0.271815135093 | 0.638242262151  |
| C  | -3.856536269395 | -5.793160865291 | -1.552449246357 | C | -0.137161844175 | -0.073113923086 | -0.348979074673 |
| H  | -2.827081258765 | -6.113792690750 | -1.353140517651 | H | 0.539924513791  | -0.801334064479 | 1.551826696656  |
| H  | -4.356425274575 | -5.755128002332 | -0.577450506703 | C | -1.516781793931 | -0.552302233269 | -0.410537246009 |
| C  | -4.545579390245 | -6.834179499862 | -2.430010636711 | C | -2.677163396293 | 0.159230339020  | -0.500990253127 |
| H  | -4.045816053430 | -6.871676326509 | -3.404088297878 | C | -3.862336219519 | -0.649520295137 | -0.540789904151 |
| H  | -5.573975297388 | -6.513442866322 | -2.628476810353 | C | -3.663059724767 | -1.986292409481 | -0.483870091885 |
| C  | -4.556590655974 | -8.226623536265 | -1.808600199509 | I | 3.700078541814  | 1.910437030952  | -1.695091353173 |
| H  | -3.539730801145 | -8.585978933403 | -1.629576763490 | I | -5.150022298955 | -3.436762500590 | -0.509439829720 |
| H  | -5.079058205663 | -8.224961602711 | -0.848311159327 | C | 3.214849304713  | 0.164062544948  | 1.346194494431  |
| C  | 0.877261383619  | 3.993791576364  | -3.428196251779 | H | 3.893839146064  | 1.011442434817  | 1.224834268741  |
| H  | -0.188924733150 | 4.078521705090  | -3.187861266110 | H | 2.828229123648  | 0.218330685053  | 2.368396182426  |
| H  | 1.363136535036  | 4.862008204751  | -2.967122812368 | C | 3.996967009754  | -1.142113249708 | 1.168296128681  |
| C  | 1.059664148134  | 4.059147319044  | -4.941382218487 | H | 4.380271967472  | -1.190329864593 | 0.143992867113  |
| H  | 2.125920176861  | 3.973787795644  | -5.182622436901 | H | 3.313758833488  | -1.990908332878 | 1.280078682096  |
| H  | 0.574090494012  | 3.190990914435  | -5.402483753647 | H | -4.849983763862 | -0.211368023520 | -0.608235687413 |
| C  | 0.504211811174  | 5.335722572233  | -5.566253434364 | C | -2.772231705827 | 1.661461087562  | -0.486469812435 |
| H  | 0.989658280818  | 6.202853215550  | -5.105388249919 | H | -1.800413348301 | 2.100607783944  | -0.715984928319 |
| H  | -0.560911474960 | 5.420253363014  | -5.325110503669 | H | -3.454775475358 | 1.983145129259  | -1.280126641919 |
| C  | 0.690792434063  | 5.390901746524  | -7.078631962465 | C | -3.265259287477 | 2.209728304974  | 0.857538169401  |
| H  | 0.285021154871  | 6.313372834353  | -7.499157409314 | H | -2.573799394538 | 1.891129635207  | 1.644361933697  |

### 3-Hexyl-5-(3-hexyl-5-iodo-selenophen-2-yl)-2-iodo-thiophene

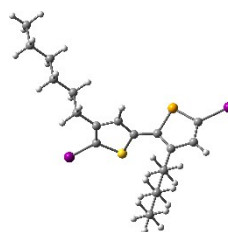

|    |                 |                 |                 |
|----|-----------------|-----------------|-----------------|
| H  | -4.234672063972 | 1.763137648281  | 1.103516223136  |
| C  | 5.151103645399  | -1.280098892352 | 2.155810581383  |
| H  | 5.829988037812  | -0.427111041404 | 2.039954975860  |
| H  | 4.762462503606  | -1.222902272997 | 3.179608605077  |
| C  | 5.937247909136  | -2.576506731921 | 1.986973557318  |
| H  | 5.258735484746  | -3.430014996039 | 2.102888659587  |
| H  | 6.324827205514  | -2.634233070036 | 0.963052887691  |
| C  | 7.094937864231  | -2.718303186190 | 2.971005730148  |
| H  | 6.707253998779  | -2.660316182059 | 3.993910712512  |
| H  | 7.772709807623  | -1.865736120845 | 2.854338487390  |
| C  | 7.873950575247  | -4.017089893642 | 2.793753727608  |
| H  | 7.227388322158  | -4.886839759563 | 2.937530028890  |
| H  | 8.300521345006  | -4.086313429115 | 1.789582540194  |
| C  | -3.388044167187 | 3.730135357786  | 0.865320226514  |
| H  | -2.416488965522 | 4.172652863116  | 0.616454467984  |
| H  | -4.076787967724 | 4.042621889629  | 0.071379085088  |
| C  | -3.870101164197 | 4.290204354908  | 2.199922697584  |
| H  | -4.841770571705 | 3.847698946545  | 2.449801672481  |
| H  | -3.181540266358 | 3.977676417679  | 2.993860587372  |
| C  | -3.993156161836 | 5.811173920417  | 2.211960916061  |
| H  | -4.681448926661 | 6.122918575481  | 1.418865464230  |
| H  | -3.022288207211 | 6.252549469000  | 1.962173017128  |
| C  | -4.474440424582 | 6.361235494186  | 3.550214905346  |
| H  | -4.553333123344 | 7.450198674668  | 3.530900107648  |
| H  | -5.458428555717 | 5.961479447081  | 3.809417100182  |
| H  | -3.786914093826 | 6.092308639981  | 4.356543509376  |
| H  | 8.695485111631  | -4.092513565173 | 3.509179898646  |
| S  | 0.582117202707  | 0.813494992005  | -1.672675748608 |
| Se | -1.845909850785 | -2.411243266586 | -0.376607465182 |

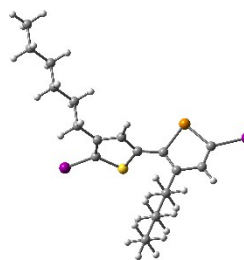

**3-Hexyl-5-(3-hexyl-5-iodo-tellurophen-2-yl)-2-iodo-thiophene**

|   |                 |                 |                 |
|---|-----------------|-----------------|-----------------|
| C | 1.968293064440  | 0.734916510093  | -0.780423377180 |
| C | 1.863319677758  | 0.137102705835  | 0.440155512963  |
| C | 0.548626621381  | -0.389813930605 | 0.637093983337  |
| C | -0.313874321204 | -0.184408488132 | -0.395822096879 |
| H | 0.251889454265  | -0.899393691532 | 1.545288239753  |
| C | -1.706434559150 | -0.616472682029 | -0.520064139837 |
| C | -2.822601204765 | 0.162022357009  | -0.546118597776 |
| C | -4.088680040561 | -0.517548306270 | -0.683098712919 |
| C | -4.090736628400 | -1.864215493811 | -0.777434398154 |
| I | 3.641311290632  | 1.667121607365  | -1.587991213402 |
| I | -5.813806858436 | -3.019146319091 | -0.973429636813 |
| C | 2.957930208581  | -0.004933269453 | 1.456975818509  |
| H | 3.669057548328  | 0.817668247230  | 1.350301516626  |
| H | 2.524584537189  | 0.085564294871  | 2.457700298308  |
| C | 3.705403570133  | -1.338555897866 | 1.347050870193  |
| H | 4.135238191346  | -1.423746468521 | 0.343832026831  |
| H | 2.990928649758  | -2.162986733164 | 1.445609703321  |
| H | -5.009934397788 | 0.053553981436  | -0.706555888439 |
| C | -2.810098293916 | 1.659837895333  | -0.374011201365 |
| H | -1.810894350244 | 2.050694697085  | -0.570363756368 |
| H | -3.474426599486 | 2.109450252047  | -1.119591923888 |
| C | -3.253784909224 | 2.095646378562  | 1.027115649345  |
| H | -2.578537280960 | 1.650984122699  | 1.765368890588  |
| H | -4.249133990704 | 1.691330874830  | 1.240722724230  |
| C | 4.806303480724  | -1.487515667871 | 2.392055659678  |
| H | 5.516726007260  | -0.658941665776 | 2.289020893976  |
| H | 4.371419175644  | -1.392627866011 | 3.394223167832  |
| C | 5.558087039118  | -2.811189710718 | 2.292261916779  |
| H | 4.848205758743  | -3.640462141207 | 2.395895363066  |
| H | 5.991757493792  | -2.906744901370 | 1.289872961965  |
| C | 6.662804188720  | -2.962994297984 | 3.333983440105  |

|    |                 |                 |                 |   |                 |                 |                 |
|----|-----------------|-----------------|-----------------|---|-----------------|-----------------|-----------------|
| H  | 6.229144901854  | -2.866946840239 | 4.335328953957  | C | -2.568152863204 | 0.424779897890  | -0.768593810671 |
| H  | 7.371970430595  | -2.134749012994 | 3.229470193889  | C | -3.858470575775 | -0.218074176319 | -0.697215051583 |
| C  | 7.407858300881  | -4.289024976113 | 3.225925548578  | C | -3.902771797117 | -1.559855928282 | -0.555749966379 |
| H  | 6.728040143675  | -5.134723656323 | 3.359495568141  | I | 4.103966584454  | 1.383773249918  | -2.243846083863 |
| H  | 7.879115580221  | -4.397007065619 | 2.245424815777  | I | -5.665336839849 | -2.664290139255 | -0.432437181566 |
| C  | -3.273038432598 | 3.611651916836  | 1.195344216554  | C | 3.232072892929  | 0.509984093056  | 1.043436927021  |
| H  | -2.275945018868 | 4.012174087654  | 0.978498234785  | H | 3.990993413951  | 1.247176505677  | 0.771935781358  |
| H  | -3.946060686565 | 4.050999670005  | 0.449466374558  | H | 2.781857264209  | 0.855870044608  | 1.978983637782  |
| C  | -3.704207715646 | 4.058958550970  | 2.588649700920  | C | 3.904095319634  | -0.847704871313 | 1.276194295128  |
| H  | -4.701359717763 | 3.658131418236  | 2.806348196053  | H | 4.352625149232  | -1.187879683397 | 0.337303459904  |
| H  | -3.031415775789 | 3.619507634205  | 3.334574957960  | H | 3.141685834470  | -1.589299020067 | 1.538353410601  |
| C  | -3.723814649058 | 5.574999052742  | 2.761502464437  | H | -4.763466345894 | 0.375954176229  | -0.757212052223 |
| H  | -4.396316254326 | 6.013567067278  | 2.016304207465  | C | -2.498846731740 | 1.927360227359  | -0.867787859919 |
| H  | -2.727507821213 | 5.974752678128  | 2.543867035586  | H | -1.514040349642 | 2.231707590299  | -1.225815651162 |
| C  | -4.155047472664 | 6.011845470308  | 4.157342460328  | H | -3.224414395315 | 2.269421867095  | -1.613363724679 |
| H  | -4.160047177189 | 7.099613113929  | 4.253216376301  | C | -2.782996912975 | 2.621005617248  | 0.469350219664  |
| H  | -5.161597373428 | 5.653374252941  | 4.388791044558  | H | -2.045753853417 | 2.283685222944  | 1.205098833740  |
| H  | -3.480384891746 | 5.614302358237  | 4.920225967104  | H | -3.760574248877 | 2.303397193151  | 0.848041041689  |
| H  | 8.191811664951  | -4.371003755390 | 3.981654807618  | C | 4.968864318598  | -0.801210725564 | 2.367265601829  |
| S  | 0.492317701181  | 0.663859283852  | -1.695818763238 | H | 5.727354332637  | -0.056027132559 | 2.100367346298  |
| Te | -2.180770259479 | -2.631493641625 | -0.704452055716 | H | 4.515553512693  | -0.452447801984 | 3.302861717353  |

### 3-Hexyl-5-(3-hexyl-5-iodo-tellurophen-2-yl)-2-iodo-selenophene

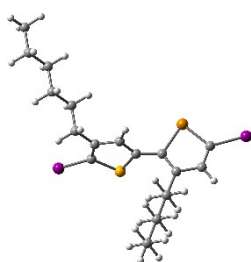

|   |                 |                 |                 |   |                 |                |                 |
|---|-----------------|-----------------|-----------------|---|-----------------|----------------|-----------------|
| C | 2.341720467166  | 0.750267112518  | -1.333394179000 | H | -1.768035762507 | 4.454748081819 | -0.018510506063 |
| C | 2.168012090309  | 0.460482062904  | -0.016581674099 | H | -3.483395753211 | 4.473138214540 | -0.376370477884 |
| C | 0.826172720367  | 0.050340038739  | 0.291076078545  | C | -3.015776095819 | 4.845353248443 | 1.691819416297  |
| C | -0.066547028718 | 0.019802058406  | -0.730268606721 | H | -3.993657961085 | 4.532323505621 | 2.076712503394  |
| H | 0.533885780524  | -0.211026073903 | 1.301753865534  | H | -2.278433846190 | 4.515055503220 | 2.433043277362  |
| C | -1.472956630473 | -0.378912998255 | -0.682860236278 | C | -2.979558492937 | 6.367610957607 | 1.591601214110  |

H -3.716926450708 6.697231558983 0.851628605337  
H -2.002723325656 6.679563938724 1.206539053264  
C -3.248195909241 7.060792540189 2.922947997067  
H -3.216446756093 8.147695648887 2.822526716880  
H -4.232617971769 6.792089855779 3.315295451741  
H -2.505643802237 6.774714721648 3.672602367755  
H 8.144059245940 -3.394947568637 4.711154517592  
Te -2.013135830570 -2.376451531584 -0.478343333210  
Se 0.776975351839 0.522324605311 -2.341996102542

Ni(dppp)  
Ni -0.354550527871 -0.146600764045 -1.879340929270  
P 1.596347167042 -0.276761084107 -1.066220068334  
P -1.878179947338 -0.004473392122 -0.415625742574  
C 1.198770621540 -0.951852126218 0.641432438762  
C -0.889836806282 0.687116495428 1.024781387191  
H 2.120920239500 -1.201829819714 1.174545124703  
H 0.718233642844 -1.906196621507 0.412748710148  
H -1.556447723215 0.944245289311 1.853378214530  
H -0.526699887704 1.638174407574 0.627785176841  
C 2.902259302511 -1.505138524126 -1.569970276294  
C 4.246387607831 -1.418615427330 -1.212147581398  
C 2.483827513539 -2.587476445783 -2.342827710665  
C 5.146958087300 -2.396373758769 -1.611573961202  
H 4.600354196942 -0.577249965365 -0.628938703403  
C 3.380370138857 -3.571800952947 -2.732476108095  
H 1.444108417908 -2.647063623290 -2.646310127439  
C 4.715806766525 -3.476928529550 -2.368239727976  
H 6.190714336687 -2.311966489334 -1.331918059535  
H 3.037311903712 -4.407779038359 -3.330726318644  
H 5.420686724756 -4.238789125045 -2.679559609383  
C 2.581065062881 1.257323107449 -0.724535177778  
C 2.625675870687 2.231781591015 -1.721141483605  
C 3.257652121004 1.497293395613 0.471064377186  
C 3.342091244092 3.405186258798 -1.538020986008  
H 2.085096736272 2.064812773198 -2.646097966020  
C 3.966150544105 2.676169153910 0.661498952710  
H 3.237182488742 0.761239360574 1.265744175205  
C 4.012743205726 3.630787686680 -0.344015670286  
H 3.369113232663 4.148961110811 -2.325606255157  
H 4.483679332001 2.848099014466 1.598077263074  
H 4.565937271487 4.550537835383 -0.195503812971  
C -2.669146511158 -1.533122267932 0.275342779339  
C -3.070198772432 -2.517536281650 -0.627358603797  
C -2.865802859668 -1.759669930517 1.637259320362  
C -3.669281395243 -3.687646059167 -0.185085221118  
H -2.902042429259 -2.360983329706 -1.6870111150877  
C -3.454844800302 -2.935191871290 2.083534067609  
H -2.560007454159 -1.015646415070 2.362951245075  
C -3.861010898615 -3.899853349299 1.173048242793  
H -3.978596934901 -4.439305548707 -0.901711798257  
H -3.597296575493 -3.096631987090 3.145710817506  
H -4.321000393373 -4.816986404310 1.521324542106  
C -3.280186234699 1.221245992139 -0.424091310243  
C -4.402983621716 1.140936287821 0.397541598662  
C -3.172446707495 2.294892303193 -1.306998404468  
C -5.388932355668 2.116327311379 0.341887048157  
H -4.519851684848 0.306204100976 1.077898094297  
C -4.151109103606 3.276940443545 -1.355067449980  
H -2.313597662820 2.349403112509 -1.967358058681  
C -5.263465226982 3.188330198581 -0.530523980541  
H -6.260135069580 2.036764023319 0.981757836489  
H -4.049850360230 4.106153834683 -2.045432143864  
H -6.034688710094 3.948351354945 -0.572826924693  
C 0.294883193585 -0.128451319836 1.581397895801  
H 0.920182784271 0.578875885438 2.133087657052  
H -0.086535030260 -0.828974896550 2.329368356957

S  
C 0.884574669962 -3.285055145343 -1.926223842531  
C 1.622017233896 -2.166834463187 -2.160553113166

C 0.788334051582 -1.022199923616 -2.371338426615  
C -0.536866590392 -1.298261531513 -2.291928765698  
S -0.819783838325 -2.972795702564 -1.956580530937  
H -1.366765954365 -0.618767672564 -2.405028960690  
H 1.175347993165 -0.030757036574 -2.568325341319  
C 3.123795796664 -2.127629693978 -2.217122279561  
H 3.522322121045 -3.064294401284 -1.820072892968  
H 3.487360272388 -1.333938053207 -1.556837289179  
C 3.664348334080 -1.898762824932 -3.630639591809  
H 3.347226057721 -2.700001194845 -4.301091755239  
H 3.299854066727 -0.956760831533 -4.045978217859  
H 4.756018883686 -1.865167446939 -3.631393041232  
H 1.247980492167 -4.282733197921 -1.733251471197

Se  
C 0.915396177174 -3.324159999280 -1.921425147738  
C 1.617912699602 -2.188408964821 -2.155676085885  
C 0.788420031617 -1.033847095054 -2.368541798208  
C -0.544240459813 -1.251473265687 -2.304032362140  
Se -0.931147059030 -3.042392108998 -1.947681540571  
H -1.330780746088 -0.523397436518 -2.427420461280  
H 1.205705568538 -0.052455476230 -2.560879291700  
C 3.120582750711 -2.124288505098 -2.214539474318  
H 3.535725472006 -3.051366236717 -1.812368502553  
H 3.470881919017 -1.319779474237 -1.559970641442  
C 3.654510873528 -1.895196007883 -3.630540864221  
H 3.350433755831 -2.706617215465 -4.294764897514  
H 3.272985840185 -0.962717390862 -4.052068798193  
H 4.745441224633 -1.842354982598 -3.633486544941  
H 1.323935542088 -4.305504960553 -1.732969109298

Te  
C 0.953958774611 -3.376009588693 -1.915955420552  
C 1.612109910603 -2.216735311620 -2.149366100874  
C 0.787919964236 -1.049412904592 -2.364021107633  
C -0.552954067835 -1.191716316254 -2.319396120970  
Te -1.088337888742 -3.139128531079 -1.937738134723  
H -1.270206986731 -0.396227713093 -2.456059522602  
H 1.244708980242 -0.082259566053 -2.548579330211  
C 3.115359015157 -2.118555140031 -2.210921588181  
H 3.552365903650 -3.031599814556 -1.800362696017  
H 3.447095975551 -1.298724147808 -1.565429010024  
C 3.640957997778 -1.891555945778 -3.630423123812  
H 3.355846936750 -2.717781782678 -4.284749465407  
H 3.235998788529 -0.973631593921 -4.061970297585  
H 4.730288780331 -1.811890896065 -3.636129577132  
H 1.430651505870 -4.328729867777 -1.735264024275

complex 1  
Ni 3.797812605974 -0.017469533908 0.532404320786  
P 4.060999073649 1.743568023722 -0.784247063315  
P 4.847766473136 -1.491591362681 -0.741749010642  
C 4.417642982867 1.183331190371 -2.530328364243  
C 6.183531570170 -0.601830830625 -1.700028860650  
H 4.363349416600 2.023812893599 -3.226138243006  
H 3.559353270067 0.546747763434 -2.762571610277  
H 6.880587960225 -1.314322736513 -2.146800182249  
H 6.743903525600 -0.081841254022 -0.918389796052  
C 2.545998254082 2.761640936914 -1.101831872156  
C 2.563745327778 4.123667023803 -1.394238009585  
C 1.320338964481 2.096865950916 -1.054171974578  
C 1.379826394113 4.804293311628 -1.643912853839  
H 3.502823417793 4.662867356487 -1.416860137273  
C 0.139631396357 2.775163703565 -1.317383971788  
H 1.291954290488 1.046563857102 -0.786266453168  
C 0.166936561848 4.131115988967 -1.611811878716  
H 1.406508152430 5.865172899861 -1.863724816828  
H -0.804695555744 2.245253791309 -1.277851619901  
H -0.755902318809 4.664182691214 -1.807613428239  
C 5.377797441168 2.995297507828 -0.434922456723  
C 5.700605760852 3.237689228465 0.899918085030  
C 6.066264623794 3.693882838753 -1.426567028409  
C 6.674653515801 4.166150218896 1.237372803689  
H 5.181837383027 2.686454333602 1.675326971410  
C 7.048219206626 4.615753154776 -1.090919558004  
H 5.837785601458 3.524726270976 -2.471918573731  
C 7.351997259671 4.855595448829 0.241691480582  
H 6.910072262210 4.345754272437 2.279639409215  
H 7.576039055554 5.148922243613 -1.872877228412  
H 8.118126981160 5.575750411906 0.503106288461  
C 3.941127687621 -2.464376919253 -2.024450530099  
C 2.604301552468 -2.771520920580 -1.771105387808  
C 4.514958247737 -2.888482147825 -3.223224802962

C 1.861942447318 -3.497695555042 -2.692109626140  
H 2.145288215107 -2.437655658022 -0.846751905214  
C 3.769186645008 -3.605872124297 -4.147726094513  
H 5.552669320669 -2.664392868382 -3.440567467280  
C 2.441740962791 -3.913395387049 -3.881972577734  
H 0.825826032649 -3.733090295446 -2.479955941578  
H 4.226144106654 -3.927195011898 -5.076353716352  
H 1.860108569470 -4.474631881643 -4.603683381475  
C 5.877005778468 -2.760187084479 0.134542014767  
C 6.037603623427 -4.074270572115 -0.297529741424  
C 6.521525949855 -2.354251419703 1.304160492145  
C 6.835028421950 -4.958099191453 0.418166109379  
H 5.531893952534 -4.417592799602 -1.191260511813  
C 7.329067578872 -3.232396079384 2.010174630755  
H 6.375575229105 -1.342978900281 1.668573108496  
C 7.486525534303 -4.539081236897 1.568387159606  
H 6.944944521841 -5.979718369451 0.073699603408  
H 7.825274142008 -2.899924721977 2.914314620033  
H 8.108120640674 -5.230541824725 2.124633038438  
C 0.775984293028 -0.042952630724 2.107826722944  
C 1.678086865531 0.928308810891 2.333954390789  
C 3.055303184471 0.440479315235 2.336162151896  
C 3.142049247994 -0.962695598063 2.114675704575  
S 1.491351331040 -1.641764475351 1.923153766587  
H 3.863638543938 -1.622124471160 2.579924514807  
C 3.814638230203 0.971312994762 2.902653540815  
H 1.331629793057 2.368641180270 2.578451342001  
H 0.272322535183 2.526365562566 2.360968688531  
H 1.887406318453 2.996249227311 1.874341366027  
C 1.629295237574 2.824915310327 4.009426549638  
H 1.062527215815 2.233086203239 4.731153859573  
H 2.688655349640 2.715343638791 4.251613497279  
H 1.364310953723 3.875932333770 4.146620355390  
C 5.721659135175 0.404390542023 -2.770456724904  
H 5.604386177738 -0.121945977800 -3.721127153583  
H 6.539106565618 1.114479951266 -2.919908545819  
H -0.293698553141 0.075486416929 2.012262993430

complex 2

Ni 3.779774897074 -0.037812352798 0.531154940541  
P 4.031192071105 1.722326095034 -0.792559412611  
C 4.841246416448 -1.505766883567 -0.745870078808  
C 4.427271418075 1.170990900503 -2.531973942632  
C 6.191720832649 -0.598033657441 -1.666627607959  
H 4.380320288483 2.012982475223 -3.226522819135  
H 3.578239009961 0.529063825481 -2.782632773984  
H 6.907218329123 -1.301741226886 -2.097634797747  
H 6.726846968829 -0.071011612567 -0.872189962109  
C 2.504484991916 2.715550189943 -1.130137076295  
C 2.515671498552 4.052721732418 -1.522416168104  
C 1.281186821503 2.058265245880 -1.002659126780  
C 1.326677249238 4.715781534492 -1.791440525169  
H 3.454236041268 4.586898102984 -1.607358612924  
C 0.093994466662 2.719058436312 -1.283648794372  
H 1.260173639660 1.030209630718 -0.658980323865  
C 0.114538506233 4.049079813938 -1.677921601028  
H 1.347763179169 5.757473590942 -2.089593877399  
H -0.849188303434 2.195718356531 -1.180678819423  
H -0.812794515689 4.568570835633 -1.888579542142  
C 5.319006645908 2.997071194365 -0.417558657215  
C 5.582116100467 3.274622935809 0.923746853278  
C 6.040021663269 3.682033223509 -1.395303316916  
C 6.528620464671 4.224076873411 1.279686987558  
H 5.038666342289 2.734505478413 1.689901528816  
C 6.995072555698 4.625024791205 -1.040426475940  
H 5.859330702671 3.485608489514 -2.445123161200  
C 7.238835774441 4.899930676241 0.297473574504  
H 6.717007441993 4.430953742933 2.326450100293  
H 7.548718926400 5.147034096256 -1.811988230569  
H 7.983773822615 5.636511114141 0.573908332751  
C 3.964646635507 -2.456575120085 -2.065573531880  
C 2.607728620446 -2.718254937198 -1.879318759524  
C 4.584057595841 -2.905195600136 -3.232653554069  
C 1.888556045511 -3.423269135900 -2.834948562893  
H 2.114124117052 -2.365882035902 -0.980013136306  
C 3.862694538664 -3.601855811070 -4.191269725804  
H 5.638494771660 -2.716648536128 -3.397346037994  
C 2.513592138318 -3.863546207623 -3.992293258959  
H 0.835678934500 -3.622713294729 -2.674951208470  
H 4.354998253305 -3.942845237463 -5.094452630148  
H 1.950849387130 -4.408486333126 -4.740963237608  
C 5.852847031239 -2.786321770660 0.132676556052  
C 5.967624026314 -4.112248981052 -0.276759648094

C 6.525140298381 -2.379299064607 1.286533603501  
C 6.748265737046 -5.006817371448 0.444545499518  
H 5.439992235353 -4.456333108281 -1.157274664092  
C 7.315958993011 -3.268376514071 1.997281343094  
H 6.414046436561 -1.358477502912 1.636212729544  
C 7.428333486564 -4.587134703347 1.577548251348  
H 6.822410969878 -6.037314479110 0.117431471586  
H 7.834308002817 -2.934738115364 2.888466067977  
H 8.036894758947 -5.286754556054 2.57752986572  
C 0.747982180418 0.075144666891 2.186115953231  
C 1.727529221736 0.971195640982 2.387605647661  
C 3.085908318333 0.426600860363 2.350669723435  
C 3.167474449826 -0.974822729366 2.120208754478  
Se 1.38377368982 -1.694613871032 1.939797296931  
H 8.893292758083 -1.629916462189 2.584420725014  
H 3.867945515831 0.939046193036 2.904841369110  
C 1.478748790589 2.431289675630 2.647889601072  
H 0.429140182159 2.659463824103 2.447474316376  
H 2.064283821170 3.025868490238 1.938889666868  
C 1.826010203955 2.856816597027 4.077132848861  
H 1.231928801591 2.297640533714 4.802862980317  
H 2.879092829245 2.677196564688 4.304318885573  
H 1.631189359775 3.921687426840 4.224798403119  
C 5.741286893095 0.401372483673 -2.747989749462  
H 5.644110557230 -0.129495355142 -3.698375406878  
H 6.556366783211 1.116458268846 -2.885650150460  
H -0.309669856521 0.289782919395 2.129652447989

complex 3

Ni 3.750596300596 -0.060084313034 0.533774161347  
P 3.983662725692 1.699328501879 -0.798662285663  
C 4.830073194134 -1.517857129601 -0.746295614989  
C 4.408864589379 1.152723992161 -2.532021120947  
C 6.186874518422 -0.582473466149 -1.630382285102  
H 4.361028043082 1.993335183237 -3.228129245898  
H 3.572083137006 0.499596416328 -2.794235653886  
H 6.926695625993 -1.271657376546 -2.043088102807  
H 6.691363876782 -0.039700388007 -0.826739075385  
C 2.449794698380 2.676802809232 -1.148367622417  
C 2.456451387967 3.992203669455 -1.609503289289  
C 1.228285410227 2.031588468911 -0.961004789676  
C 1.264358877299 4.645069746246 -1.887388668150  
H 3.394379789755 4.518257297688 -1.740678770308  
C 0.036941989817 2.682475452773 -1.249477438324  
H 1.211618767710 1.022658865749 -0.564793727305  
C 0.052876916208 3.989713822194 -1.712869402736  
H 1.281795061985 5.669805945920 -2.239599287409  
H -0.905144600737 2.168918099075 -1.098603242234  
H -0.877281683470 4.501436524776 -1.930080873377  
C 5.255709204058 2.986735919730 -0.410124293875  
C 5.505060067573 3.266311746210 0.933379152349  
C 5.978107387986 3.679695681446 -1.381308403574  
C 6.438416183202 4.225607787386 1.297596331258  
H 4.961764595228 2.719741261398 1.697879432682  
C 6.919826424542 4.632851019225 -1.018127391244  
H 5.809791312894 3.481264684293 -2.4321761266072  
C 7.149355677080 4.909853731683 0.321831914465  
H 6.615738207214 4.433680372283 2.346050530959  
H 7.474370323557 5.160918630546 -1.784908567847  
H 7.883874344675 5.654371833005 0.604785243838  
C 3.997809072953 -2.453923443186 -2.105768814615  
C 6.222779846510 -2.659743670201 -2.008112024842  
C 4.674718470711 -2.941283121170 -3.224857881607  
C 1.939927029982 -3.346487460652 -3.003447161922  
H 2.085438166510 -2.279447044368 -1.146243885735  
C 3.991267091520 -3.620356318067 -4.2224252697544  
H 5.744716417173 -2.796971541835 -3.319840525260  
C 2.621925183584 -3.825220984424 -4.111848046102  
H 0.871529981015 -3.501632418617 -2.911966768603  
H 4.528220738091 -3.992052286790 -5.087245585412  
H 2.088596636785 -4.356372656438 -4.891328123903  
C 5.831479278001 -2.803321953768 0.135996686517  
C 5.879365923707 -4.146209252523 -0.228491457110  
C 6.554561536422 -2.385870344900 1.255427090324  
C 6.644973279677 -5.047503672450 0.501100817866  
H 5.312741804507 -4.498177821386 -1.081061776264  
C 7.330135125371 -3.282121454312 1.973278146784  
H 6.496078815328 -1.350825476306 1.574545949220  
C 7.376360021946 -4.618287818375 1.597541281469  
H 6.666997196750 -6.090662304806 2.08269290834  
H 7.888773912256 -2.939867526386 2.836401053210  
H 7.973502276142 -5.322787944336 2.164031745145  
C 0.710570797921 0.197309789835 2.80636387068



|    |                |                 |                |   |                 |                 |                 |
|----|----------------|-----------------|----------------|---|-----------------|-----------------|-----------------|
| C  | 1.766456937196 | 1.011650179779  | 2.438851376876 | C | 2.006305383119  | 2.892106878539  | 4.124236147218  |
| C  | 3.106153644935 | 0.415947894574  | 2.367648436279 | H | 1.379736055027  | 2.376809936751  | 4.855057518650  |
| C  | 3.201614720649 | -0.986037095308 | 2.141118794978 | H | 3.045776943904  | 2.640586134033  | 4.345668265718  |
| Te | 1.250405529409 | -1.792432175710 | 1.987178680754 | H | 1.886077205817  | 3.968180461053  | 4.270579378094  |
| H  | 3.958722994246 | -1.610955301693 | 2.598937726500 | C | 5.736523879918  | 0.400373491828  | -2.726503605427 |
| H  | 3.905669994482 | 0.924899285721  | 2.901992099909 | H | 5.658779833767  | -0.141282835650 | -3.672557319915 |
| C  | 1.619710217125 | 2.488853936779  | 2.698628027622 | H | 6.543111557327  | 1.125680465539  | -2.860359103537 |
| H  | 0.586540166310 | 2.787231252832  | 2.506480072239 | H | -0.319758829598 | 0.525729367282  | 2.270285072670  |
| H  | 2.238395249267 | 3.040625011101  | 1.983148352892 |   |                 |                 |                 |

## References

1. A. A. Jahnke, B. Djukic, T. M. McCormick, E. Buchaca Domingo, C. Hellmann, Y. Lee and D. S. Seferos, *J. Am. Chem. Soc.*, 2013, **135**, 951-954.
2. D. J. Turner, R. Anemian, P. R. Mackie, D. C. Cupertino, S. G. Yeates, M. L. Turner and A. C. Spivey, *Org. Biomol. Chem.*, 2007, **5**, 1752-1763.
3. W.-H. Lee, S. K. Son, K. Kim, S. K. Lee, W. S. Shin, S.-J. Moon and I.-N. Kang, *Macromolecules*, 2012, **45**, 1303-1312.
4. C.-H. Tsai, A. Fortney, Y. Qiu, R. R. Gil, D. Yaron, T. Kowalewski and K. J. T. Noonan, *J. Am. Chem. Soc.*, 2016, **138**, 6798-6804.
5. Y.-Y. Lai, T.-C. Tung, W.-W. Liang and Y.-J. Cheng, *Macromolecules*, 2015, **48**, 2978-2988.
